# Supplementary material
Source: PubMed Central journal article supplement (PMC6369765)
Supplement: pnas.1818539116.sapp.pdf [file pnas.1818539116.sapp.pdf]

Supplementary Information for

**Homoharringtonine deregulates *MYC* transcriptional expression by directly binding NF- $\kappa$ B repressing factor**

Xin-Jie CHEN<sup>1,2\*</sup>, Wei-Na ZHANG<sup>1\*</sup>, Bing CHEN<sup>1\*#</sup>, Ying LU<sup>1</sup>, Jin-Yan HUANG<sup>1</sup>, Yue-Ying WANG<sup>1</sup>, Jun LONG<sup>1</sup>, Song-Fang WU<sup>1</sup>, Yun-Xiang ZHANG<sup>1</sup>, Shu WANG<sup>1</sup>, Si-Xing LI<sup>1</sup>, Tong YIN<sup>1</sup>, Min LU<sup>1</sup>, Xiao-Dong XI<sup>1</sup>, Jun-Min LI<sup>1</sup>, Kan-Kan WANG<sup>1</sup>, Zhu CHEN<sup>1#</sup>, and Sai-Juan CHEN<sup>1#</sup>

<sup>1</sup> State Key Laboratory of Medical Genomics, Shanghai Institute of Hematology, National Research Center for Translational Medicine, Shanghai, Rui Jin Hospital Affiliated to Shanghai Jiao Tong University (SJTU) School of Medicine, Shanghai, China.

<sup>2</sup> Current address: Department of Hematology, Rui Jin Hospital North Affiliated to Shanghai Jiao Tong University (SJTU) School of Medicine, Shanghai, China.

\* X-J.CHEN, W-N.ZHANG, and B.CHEN contributed equally to this work.

# **Correspondence:** Sai-Juan CHEN, Zhu CHEN, and Bing CHEN

Email: sjchen@stn.sh.cn, zchen@stn.sh.cn, and chenbing.rjsih@yahoo.com

**This PDF file includes:**

Supplementary text  
Figs. S1 to S17  
Tables S1 to S2  
References for SI reference citations

**Other supplementary materials for this manuscript include the following:**

## **Supplementary Information Text**

### **Supplementary Materials and Methods**

#### **Cell assays**

The Kasumi-1, NB4, HL-60, U937, and THP-1 cells were cultured in RPMI 1640 plus 10% FBS (GIBCO). SKNO-1 cells were maintained in RPMI 1640 plus 20% FBS supplemented with 10  $\mu\text{g/L}$  GM-CSF (R&D).

Cell Counting Kit-8 for detecting cell proliferation was purchased from Dojindo Laboratories. PE-Annexin V Apoptosis Detection Kit I for detecting cell apoptosis and APC BrdU Flow Kits for conducting cell cycle assays were purchased from BD Biosciences. Experiments were conducted according to the manufacturer's instructions.

#### **Microarray and bioinformatics analyses**

For investigating HHT-modulated gene expression, total RNA was extracted using TRIzol Reagent (Life Technologies) following the manufacturer's instructions. The Affymetrix Human U133 Plus 2.0 Chip was used for microarray detection. Slides were scanned with a GeneChip® Scanner 3000 and Command Console Software 3.1 (Affymetrix) with default settings.

For ensuring the highest possible level of data quality, rigorous quality control procedures were implemented on microarray datasets before expression values were generated. The raw data have been deposited in the Gene Expression Omnibus database and are accessible through GEO series number GSE121175.

Microarray data processing was performed using R 3.1.3 and Bioconductor packages. First, raw CEL files were normalized and background-adjusted using Robust Multichip Average algorithm with the Affymetrix package. Then, the k-nearest neighbor algorithm within the impute package was applied for missing value imputation. Differential expression was assessed using the linear

model for microarray data package, a modified t-test that incorporates BH multiple hypothesis correction method. For improving the reliability of differentially expressed genes, the probe sets of the genes were defined as significantly differentially expressed probe sets when the adjusted  $p < 0.01$  and fold changes  $> 2$  between two comparison groups, according to Micro Array Quality Control project recommendations. Gene Set Enrichment Analysis (GSEA) was performed using GSEA software on probe set normalized data. Predefined gene sets were downloaded from the GSEA Molecular Signatures Database (<http://software.broadinstitute.org/gsea/msigdb/index.jsp>). Significantly over- or underrepresented gene sets were returned by GSEA, showing an  $ES < 0$ ,  $p < 0.05$ , and  $FDR < 0.05$  when 1,000 permutations of the gene-set labels were used.

#### **ESI-Q-TOF mass spectrometry and streptavidin (SA) agarose affinity assay**

Biotin-labeled HHT (bio-HHT) was provided by WuXi PharmaTech. For detecting HHT-binding proteins,  $1 \times 10^8$  Kasumi-1 cells were lysed with RIPA buffer (50 mM Tris-HCl, pH 8.0, 150 mM NaCl, 1% NP-40, 0.25% sodium deoxycholate) and treated with 100 ng/mL bio-HHT or biotin (control) overnight. Streptavidin (SA) agarose beads (Thermo) were used to enrich biotin-HHT or biotin-binding proteins. Eluted proteins were separated by SDS-PAGE and visualized by Fast Silver Stain Kit (Beyotime). The entire protein gel lanes were excised and cut into eight slices according to the protein marker: slice 1, proteins exceeding 100 kDa; slice 2, proteins ranging from 95 kDa to 100 kDa; slice 3, proteins ranging from 72 kDa to 95 kDa; slice 4, proteins ranging from 55 kDa to 72 kDa; slice 5, proteins ranging from 43 kDa to 55 kDa; slice 6, proteins ranging from 34 kDa to 43 kDa; slice 7, proteins ranging from 26 kDa to 34 kDa; and slice 8, proteins below 26 kDa. Every gel slice was subjected to in-gel digestion with trypsin.<sup>21</sup> The resulting tryptic peptides were extracted and subjected to electrospray ionization quadrupole time-of-flight (ESI-Q-TOF) mass spectrometry (MS).<sup>22</sup> MS full scans were acquired in Data Analysis (Bruker Daltonics, Bremen, Germany). Peptides were identified from MS/MS spectra by searching against SwissProt database (2015\_04) using the Mascot search algorithm<sup>23</sup>

(<http://www.matrixscience.com>). Among 2,095 prey proteins detected in the bio-HHT group, 1,941 proteins were removed as non-specific binding proteins by using a set of stringent procedures (Supplementary Table 1). Only 154 proteins were considered as potentially enriched in the bio-HHT group. Then, we focused HHT-binding protein study on potential candidates related to *MYC* regulation. The ingenuity pathway analysis (IPA) database was used to select the candidate proteins.

For verifying the interaction of SRC, STAT1, and NKRF proteins with HHT, Kasumi-1 cells were treated with 100 ng/mL biotin-HHT for 6 h and then lysed with RIPA buffer. SA agarose beads were added in cell lysates to bind biotin-HHT binding proteins. The eluted proteins were used to perform Western blot assay, and antibodies of anti-SRC (Cell Signaling), anti-STAT1 (Cell Signaling), and anti-NKRF (Abcam) were used for subsequent immunoblots.

### **Plasmid construction**

For mapping HHT-binding domain in NKRF, the NKRF full-length cDNA was cloned into a pLVX-Puro vector (Clontech), and three truncated cDNAs were cloned into a pFLAG-cmv4 vector (Clontech). All constructed plasmids were transfected into HEK 293T cells as previously described.<sup>1</sup>

For constructing the NKRF deletion, the HA-tagged NKRF full-length plasmid was used as template. The QuikChange® II XL Site-Directed Mutagenesis Kit (Agilent) was used for HA-NKRF- $\Delta$ DSRM1 and HA-NKRF- $\Delta$ DSRM2 plasmid construction according to the manufacturer's instructions.

For constructing NKRF point mutants, the HA-tagged NKRF full-length plasmid was used as template to identify key amino acids involved in HHT binding. The Quick-Fusion Cloning Kit (Selleck) was used to construct NKRF-L476A, NKRF-R477A, NKRF-W478A, NKRF-K479A, NKRF-C480A, and NKRF-K479AC480A plasmids according to the manufacturer's instructions.

For NKRF knockdown in Kasumi-1 cells, pLVX-shRNA1 (Clontech) was used, and transduced cells were selected with 1.0 µg/mL puromycin. A scramble shRNA was used as control for off-target effects of shRNA. The primer sequences are listed in Supplementary Table 2.

### **Bio-layer interferometry (BLI) assay**

The binding affinities of HHT and NKRF proteins were determined using ForteBio Octet RED96 equipped with a SA sensor as previously described.<sup>2</sup> Biotin-HHT (100 µg/mL) was immobilized on SA-coated biosensor tips (ForteBio #18-5019). Bovine serum albumin (BSA) was used as a negative control. The experiments were conducted at room temperature in binding buffer (50 mM Tris-HCl, 150 mM NaCl, 2 mM DTT, 10% Glycerol, pH 7.5, 0.02% Tween-20), and biosensor tips were immersed into wells containing purified NKRF protein within a concentration range of 5-100 µg/mL. Each data set was fitted globally to 1:1 interaction model (ForteBio) to determine the kinetic parameters  $K_{on}$  and  $K_{off}$ . The apparent affinities ( $K_D$ ) were then calculated as a ratio ( $K_{off}/K_{on}$ ) of these rate constants. The recombinant His6-NKRF full-length protein, His6-NKRF-DSRM1 domain, and His6-NKRF-DSRM2 domain were expressed and purified by Shanghai Wanshenghaotian Biotechnology Inc.

### **Real-Time q-PCR (RT-qPCR).**

For mRNA expression analysis of *KIT*, *MYC*, *BAX*, and *CDK4* in the cell lines, RT-qPCR was performed with SYBR green (QIAGEN).  $\Delta CT$  were obtained by normalizing the CT values of the *GAPDH* gene.

To evaluate the mRNA level of *KIT* and *MYC* in AML patients, the mononuclear cells of bone marrow were isolated using Ficoll solution, and the total RNA was extracted using TRIzol Reagent (Life Technologies) following the manufacturer's instructions.  $\Delta CT$  values were obtained by normalizing the CT values of the *ABL1* gene. The primer sequences are listed in Supplementary Table 2.

### **Chromatin immunoprecipitation (ChIP)**

To determine the binding of p65 to *MYC* gene promoter, ChIP-IT High Sensitivity Kit (Active motif), and anti-p65 (Cell Signaling) were used in the chromatin immunoprecipitation (ChIP) assays according to the manufacturer's standard protocol. *MYC* DNA was quantified using real-time PCR with SYBR green (QIAGEN).

### **Nuclear and cytosolic fractionation, immunoprecipitation**

To detect the translocation of NKRF and p65 proteins between nucleus and cytoplasm under the treatment of HHT in TNF- $\alpha$  simulated Kasumi-1 cells, 20nM HHT was added 1 h prior to stimulation by 100 ng/ml TNF- $\alpha$  (for p65 activation) for 4 h. The nuclear and cytoplasmic proteins of Kasumi-1 cells were fractionated using the Qproteome Nuclear Protein Kit (QIAGEN). Western blotting was performed as previously described with NKRF (Abcam) and p65 (Cell Signaling) antibodies.<sup>3</sup>

For mapping the direct binding sites of NKRF protein to HHT, 293T cells transfected with different mutant constructs were incubated with bio-HHT for 12 h. Extracts were immunoprecipitated with streptavidin agarose resin for 4 h.

To detect the interaction between NKRF and p65 in the cytoplasm of Kasumi-1 cells, Protein A+G Agarose (Beyotime Institute of Biotechnology) beads pre-coated with p65 were added to the cytoplasmic lysates and incubated at 4 °C overnight. The beads were washed for three times with 1 $\times$  lysis buffer. Western blotting was performed as previously described.<sup>3</sup>

### **Animal model**

The t(8;21) leukemia murine model harboring RUNX1-RUNX1T1 and KIT<sup>N822K</sup> mutation was generated in our institute as described previously.<sup>4</sup> For evaluating the anti-leukemic effect of HHT, 1 $\times$ 10<sup>5</sup> leukemic cells were transplanted into 8-week-old sublethally irradiated recipient

BALB/C mice for treatment. From day 5, mice of indicated group were injected with single drug or drug combination: HHT 0.5 mg/kg per day on days 1-7, Ara-C 50 mg/kg per day on days 1-7, and Doxorubicin (Doxo, Shenzhen Main Luck Pharmaceuticals Inc.) 3mg/kg on days 1-3, or the combination of Ara-C+HHT (1:1 ratio), Ara-C+Doxo (1:1 ratio), Ara-C+HHT+Doxo (1:1:1 ratio). The lifespan of mice was analyzed by Log-rank (Mantel-Cox) test. A *p* value of < 0.05 was considered statistically significant.

To determine the effect of HHT on leukemia-initiating cells (LICs), gradient-descent (10,000, 1,000, or 100 cells) GFP+/Lin-/Sca-1-/c-kit+ bone marrow cells from HHT or vehicle treated t(8;21) leukemia mice were sorted by flow cytometry and injected into sublethally irradiated recipients. The lifespan of mice was analyzed as described above.

Two xenograft mouse models were established by injecting  $1 \times 10^7$  Kasumi-1 cells expressing shSCR or shNKRF into NOD/SCID mice and  $1 \times 10^7$  SKNO-1 cells expressing shSCR or shNKRF into B-NDG mice. The human CD45+ cells in murine PB were monitored by flow cytometry. When the human leukemia cells were detectable (percentage of GFP+ cells > 0.1%), the mice were intravenously injected with HHT (0.5 mg/kg body weight) daily for 7 consecutive days. The lifespan of mice was analyzed as described above.

All BALB/C and NOD/SCID mice for the murine model were obtained from the Shanghai Laboratory Animal Center, Chinese Academy of Sciences, Shanghai. The B-NDG mice were purchased from BIOCYTOGEN, Beijing, China. The animals were housed under specific pathogen-free conditions. Experiments were conducted according to the National Institutes of Health Guide for Care and Use of Laboratory Animals. All statistical analyses were performed using GraphPad Prism 6.0 for Windows (La Jolla, California, USA).

### **Patient samples.**



37 de-novo AML patients enrolled in this study were diagnosed in Shanghai Ruijin Hospital. All patients provided informed consent for sample collection and research in accordance with the Helsinki Declaration.

## Supplementary Figures:

### Figure S1. Therapeutic effect of HHT on leukemia-initiating cells (LICs) in murine leukemia model and *in vitro* culture system of human t(8;21) AML cell lines.

(A) Chemical structure of Homoharringtonine (HHT).

(B) Body weight of RUNX1-RUNX1T1+KIT<sup>N822K</sup> leukemia mice treated with indicated drugs.

(C) Flow cytometry assay of bone marrow cells from RUNX1-RUNX1T1+KIT<sup>N822K</sup> leukemia mice with indicated markers. GFP<sup>+</sup>/Lin<sup>-</sup> cells were further analyzed using c-Kit and Sca-1 markers. GFP<sup>+</sup>/Lin<sup>-</sup>/Sca-1<sup>-</sup>/c-kit<sup>+</sup> cells (10,000, 1000, 100 cells) which indicated leukemia-initiating cells (LICs) were transplanted into recipient mice.

(D) Cell viability of Kasumi-1, SKNO-1 cells (left panel) and the primary cells from three t(8;21) AML patients (right panel) treated with different doses of HHT.

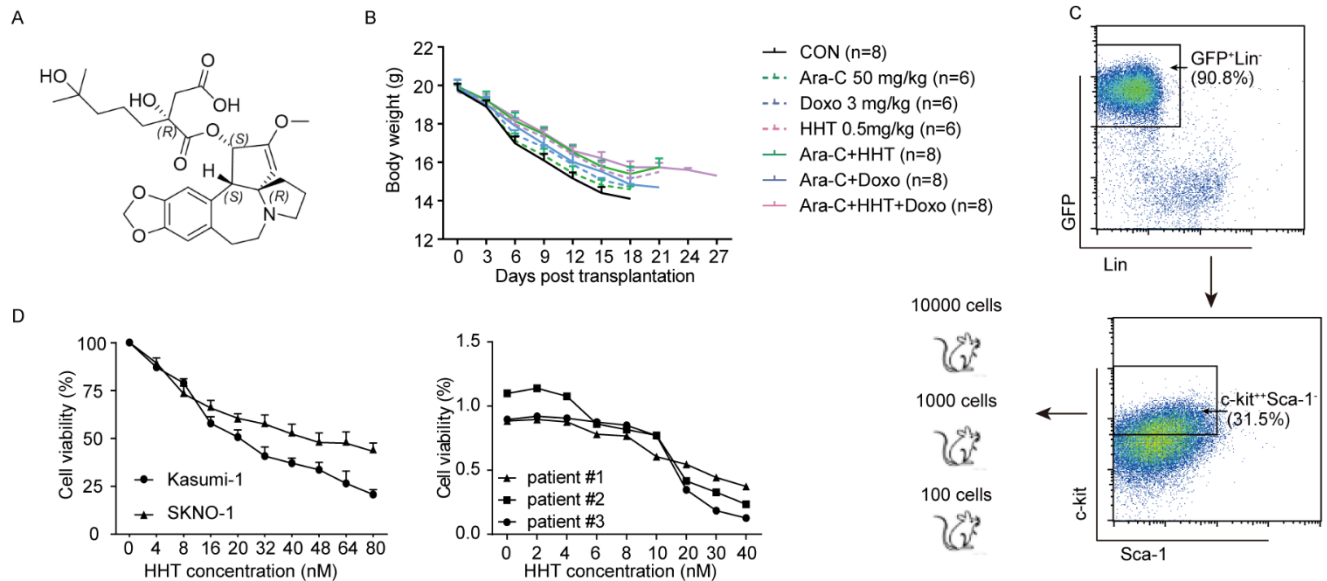

**Figure S2. HHT induces cell-cycle blockage in Kasumi-1 and SKNO-1 cells.**

Cell-cycle arrest of Kasumi-1 cells was assayed upon treatment with 20 nM HHT, 600 nM Ara-C, 500 nM Doxo and 150 nM DNR for 24 h, respectively (upper panel), while cell-cycle status of SKNO-1 cells was examined after treatment with 40 nM HHT, 600 nM Ara-C, 150 nM DNR and 500 nM Doxo for 24 h, respectively (bottom panel). The percentages of cells in each phase are indicated for distinct compartments in flow cytometry analysis (left panel) and represented in

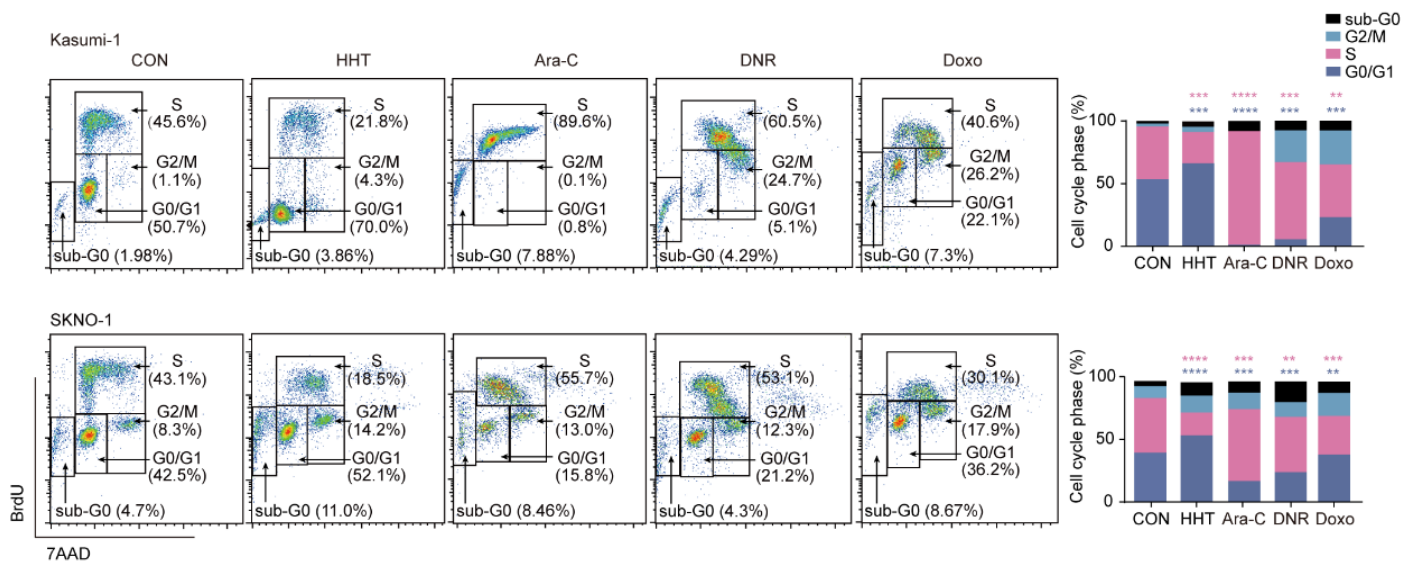

different colors on each column (right panel).

**Figure S3. HHT reduces the expression of MYC-regulated genes.**

(A) Heat map depicting differentially expressed genes altered by HHT. All genes with significantly changed expression level ( $p < 0.01$ ) are included.

(B) GSEA of HHT-induced differentially expressed genes reveals significant correlation with two MYC-upregulated target gene sets. ES, enrichment score; NES, nominal enrichment score; NOM  $p$ -val, nominal  $p$ -value; FDR, false discovery rate.

(C) Quantification of *BAX* and *CDK4* expression in Kasumi-1 cells treated with 20 nM HHT for 24h. Bars are mean  $\pm$  SD normalized to *GAPDH* expression, respectively. \* $p < 0.05$ , \*\* $p < 0.01$ .

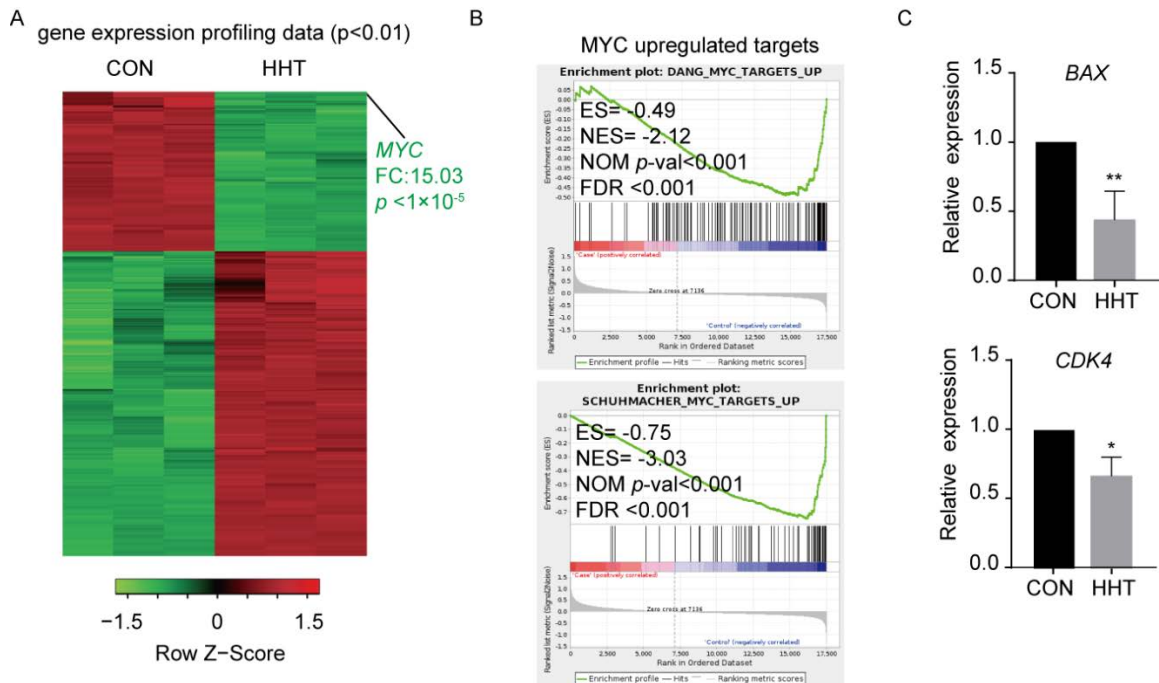

**Figure S4. Endogenous transcriptional level of *MYC* gene and the sensitivity of HHT in Kasumi-1, SKNO-1, NB4, HL-60, U937 and THP-1 cells.**

**(A)** Quantification of *MYC* expression in Kasumi-1, SKNO-1, NB4, HL-60, U937 and THP-1 cells. Bars are mean $\pm$ SD normalized to *GAPDH* gene expression.

**(B)** The correlation between *MYC* expression and HHT IC50 of indicated cell lines. The correlation coefficient ( $r$ ) is measured by the Spearman correlation coefficients.

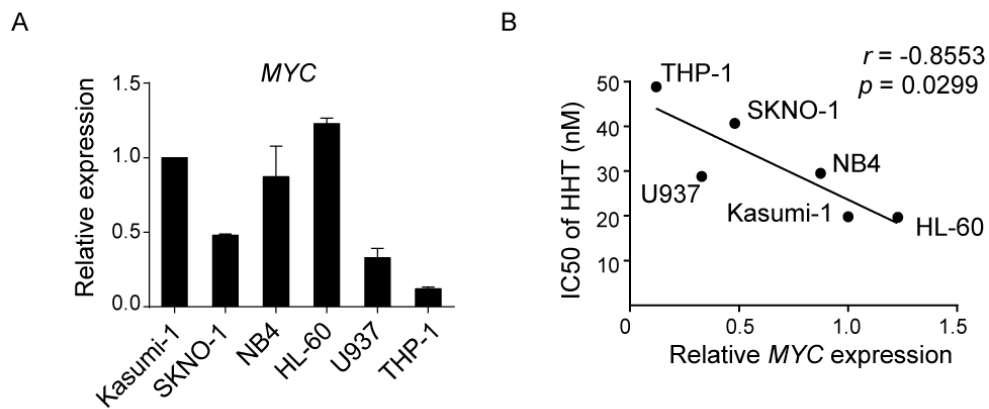

**Figure S5. Identification of NKRF as a direct HHT binding target.**

Nine candidate proteins were revealed by ESI-Q-TOF as potential HHT binding proteins which could be associated with *MYC* expression. The network displayed their regulatory relationships. Symbol shapes denoted the type of protein, solid lines indicated the direct interactions, and dashed lines indicated the indirect interactions.

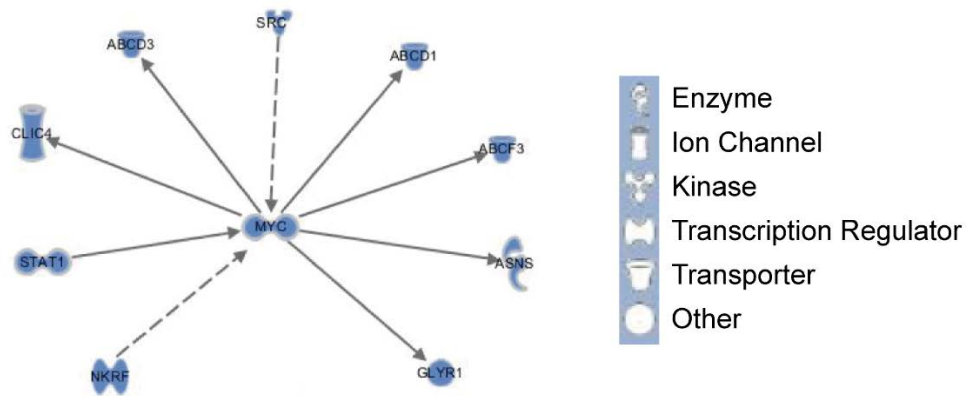

**Figure S6. Identification of direct binding of NKRF by HHT.**

ESI-Q-TOF MS/MS sequencing of two peptides: NYTYML and LESEVIA. These two peptides show a 100% match with the NKRF protein according to NCBI BLAST search (<http://blast.ncbi.nlm.nih.gov/Blast.cgi>).

K.**IN**TYMLTR.C

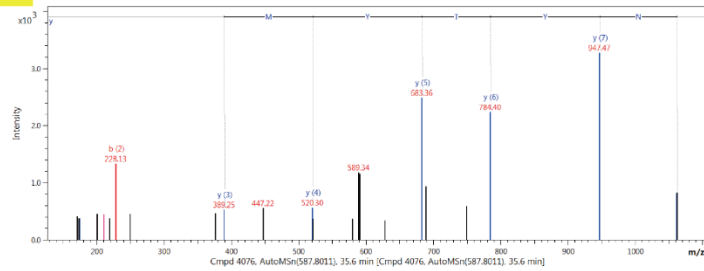

K.**VILESEVIA**EAVGVK.K

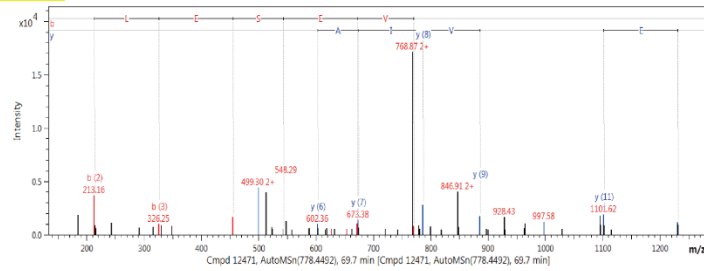

**Figure S7. Identification of the binding region of NKRF by HHT.**

**(A)** Schematic representation of the domain structures of the NKRF full-length protein and truncated mutants (left panel). The binding effect between bio-HHT and the HA-tagged full-length NKRF constructs was detected by immunoprecipitation assay (right panel).

**(B)** BLI analysis of HHT binding affinity to increasing concentrations of 6× His-NKRF-DSRM1 and 6× His-NKRF-DSRM2.

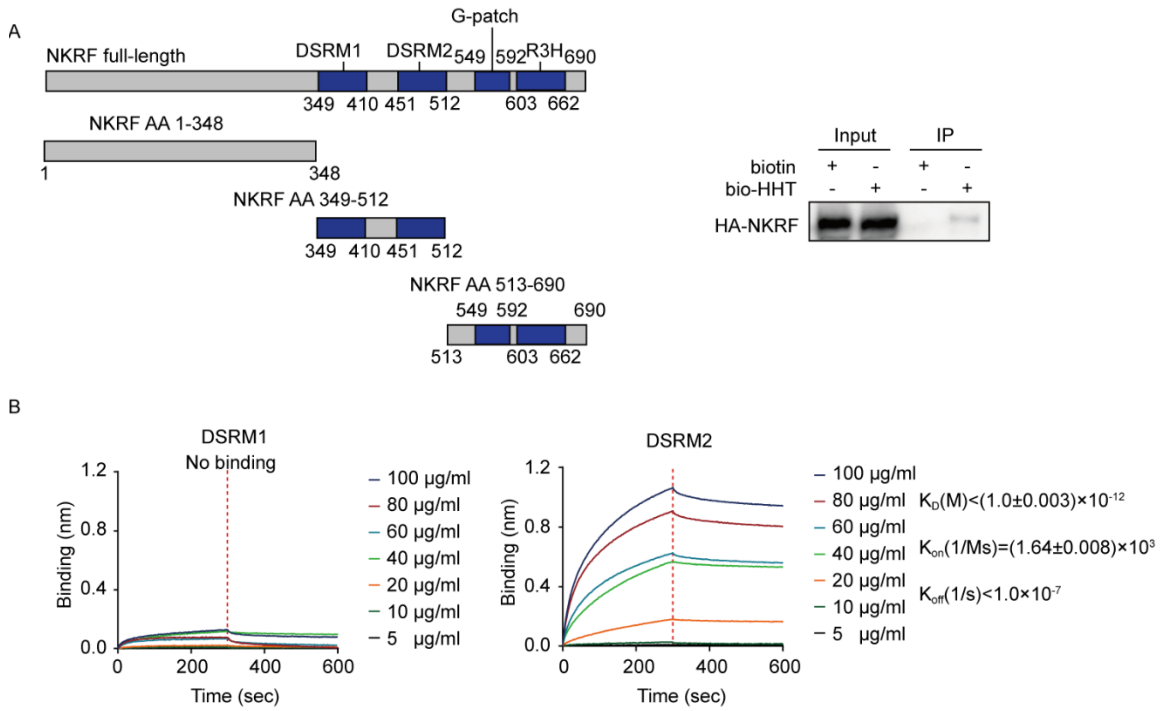



### Figure S8. Mapping of binding motif of NKRF by HHT.

BLI analysis of the binding affinity between HHT to increasing concentrations of NKRF peptides (20-22 amino acids per peptide). The candidate binding amino acids were labelled in red.

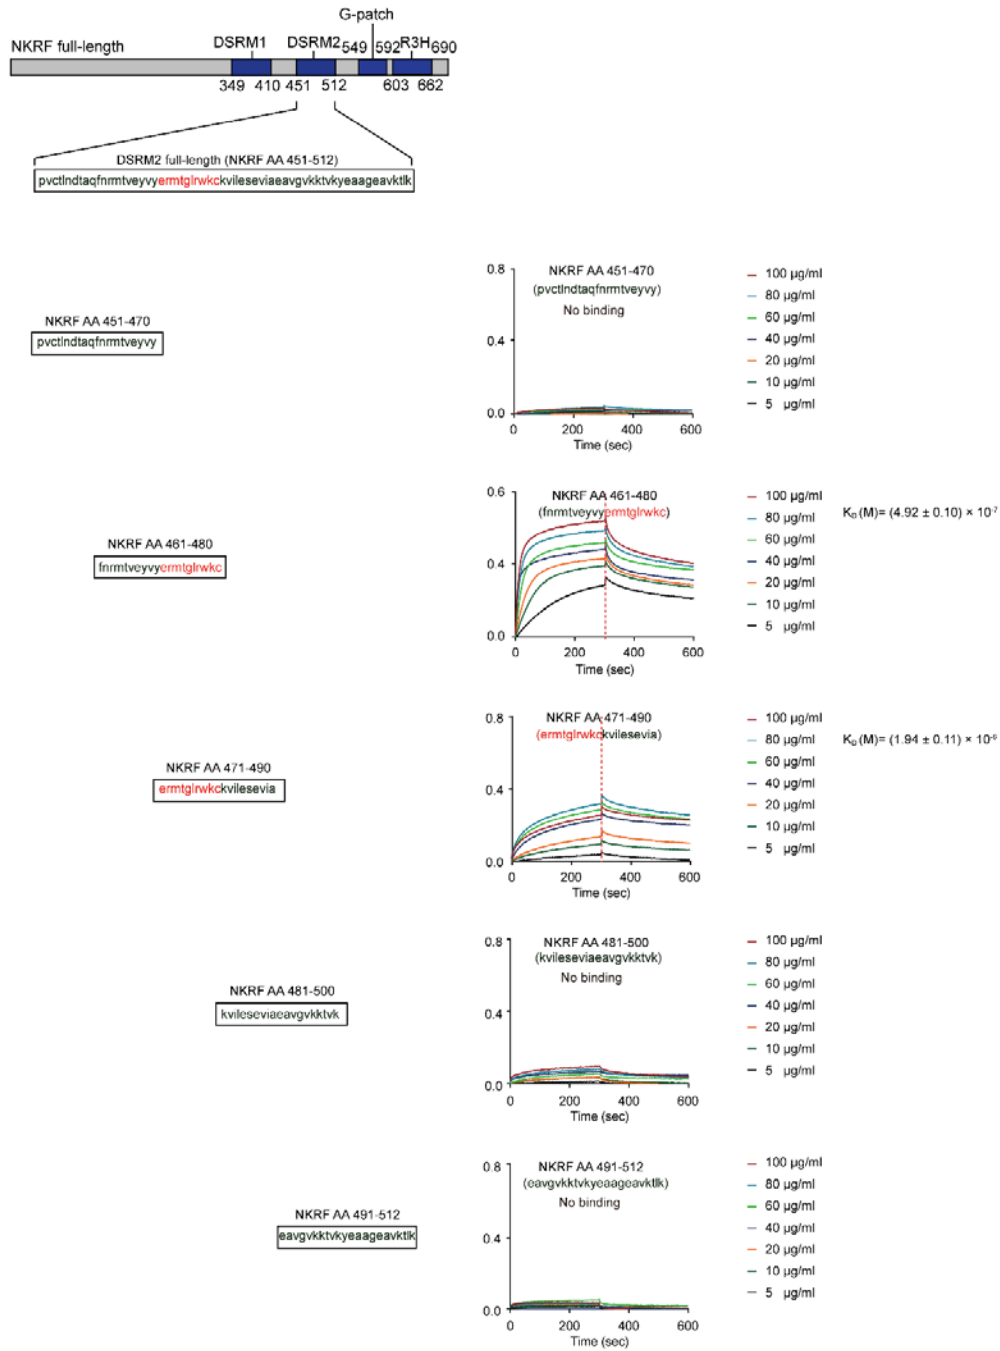

**Figure S9. Identification of binding sites of NKRF by HHT.**

BLI analysis of the binding affinity between HHT to increasing concentrations of NKRF peptides (3-4 amino acids per peptide). The candidate binding amino acids were labelled in red.

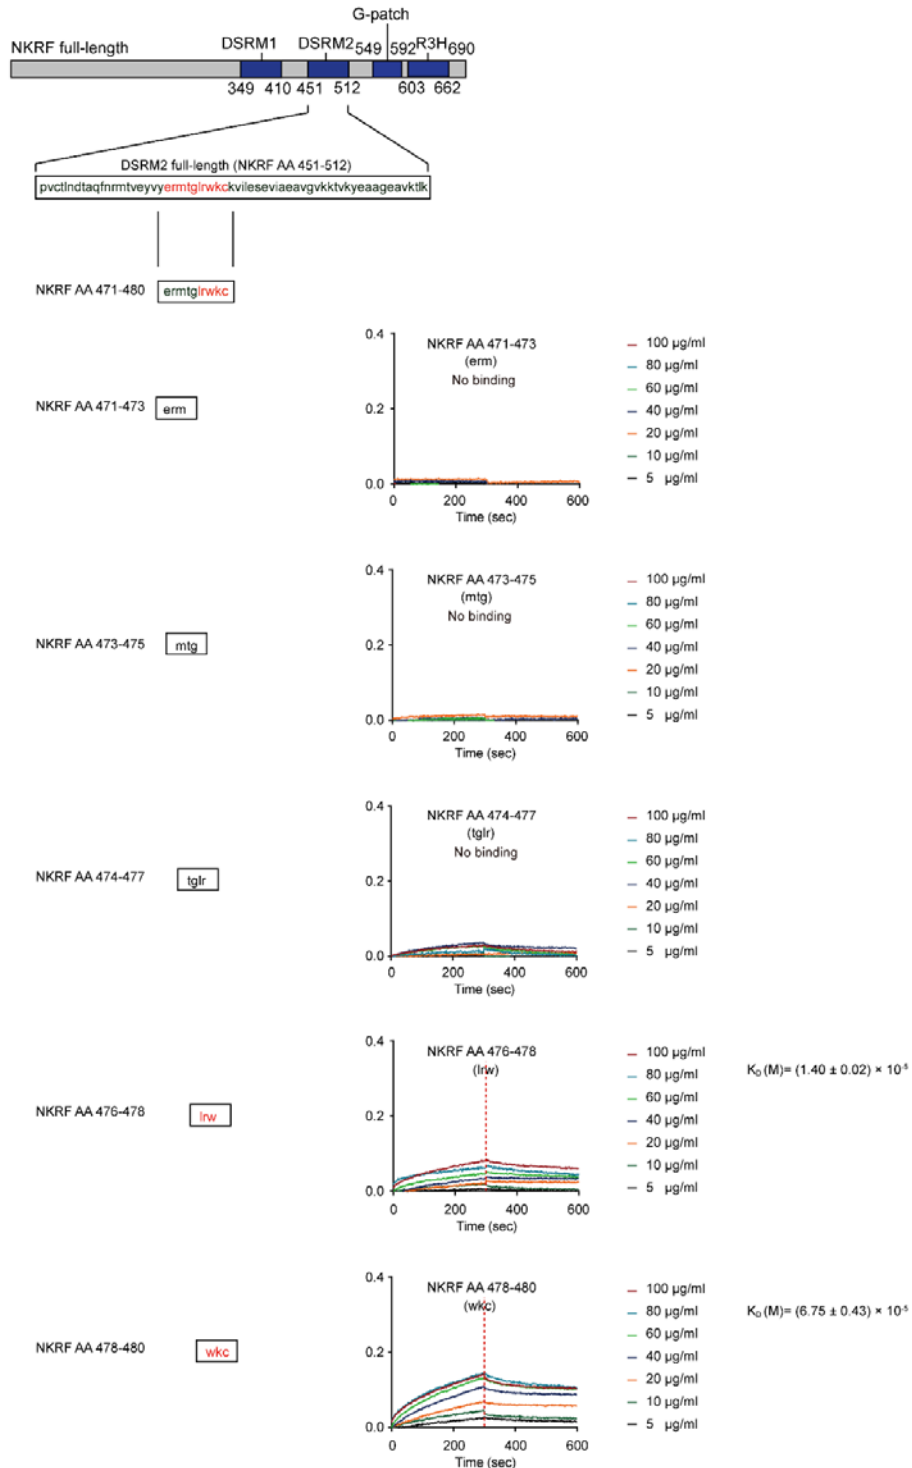

**Figure S10. HHT does not affect the phosphorylation level of p65.**

The protein expression levels of p65, phosphorylated p65, IκB and phosphorylated IκB (the key components of the classical NF-κB pathway) in Kasumi-1 cells treated with 20 nM HHT for 24h.

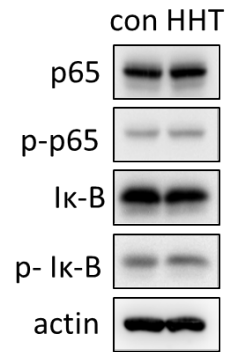

**Figure S11. HHT could still inhibit p65 translocation at low HHT dosage.**

Immunofluorescence staining of NKRF and p65 in TNF- $\alpha$  stimulated Kasumi-1 cells treated with 20 nM, 15 nM, 10 nM HHT as compared to control sample.

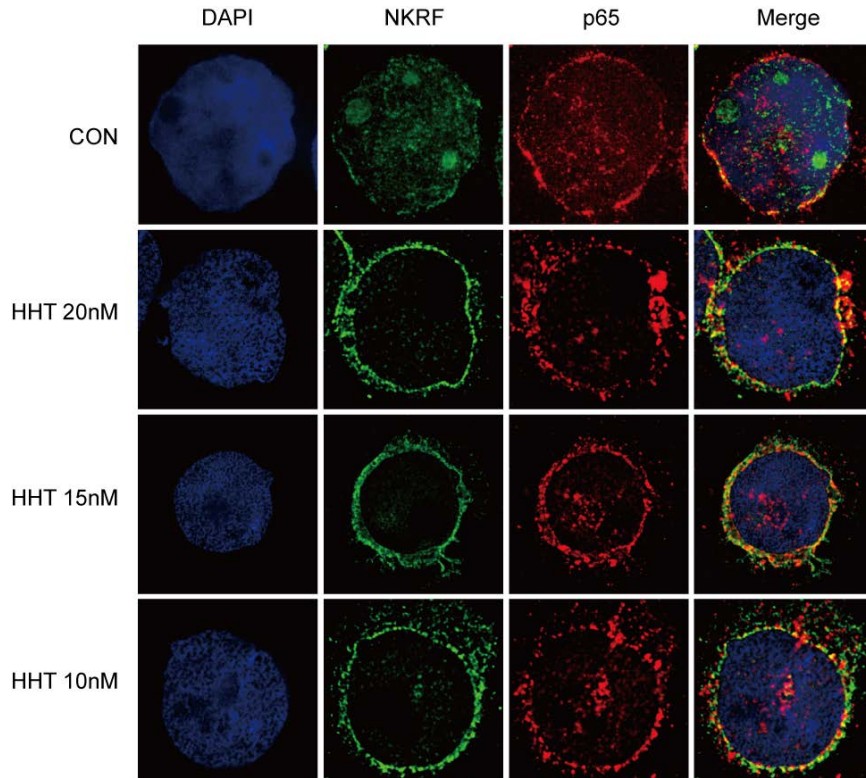

**Figure S12. The knockdown effect of *NKRF* expression in *NKRF* shRNA (shNKRF) transfected Kasumi-1 and SKNO-1 cells.**

(A) The efficacy of shNKRF in Kasumi-1 and SKNO-1 cells.

(B) The shNKRF expressing cells showed an approximately 50% decrease in *NKRF* mRNA levels compared with shSCR (a nonspecific scrambled shRNA). Bars are mean  $\pm$  SD normalized to *GAPDH* expression. \*\*\* $p < 0.001$ .

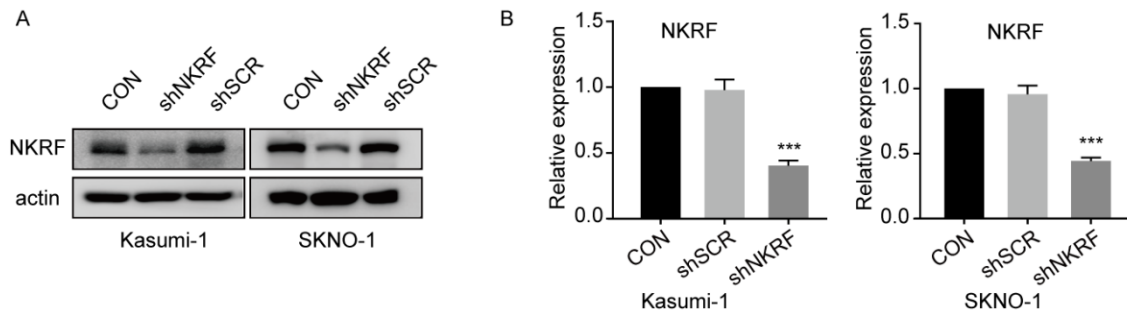

**Figure S13. Quantification of protein levels of MYC in Kasumi-1 shNKRF cells under the treatment with HHT.**

(A) Detection of protein expression levels of MYC in shSCR or shNKRF transfected Kasumi-1 cells treated with 20 nM HHT for 24h.

(B) Quantification of the grey scale of MYC protein bands was based on the data from three independent experiments. The fact that MYC protein level was deeply repressed by HHT in shSCR cells while in NFRF knock-down setting the effect of HHT on MYC protein expression was only partly abrogated suggested HHT may additionally target MYC protein synthesis or stability.

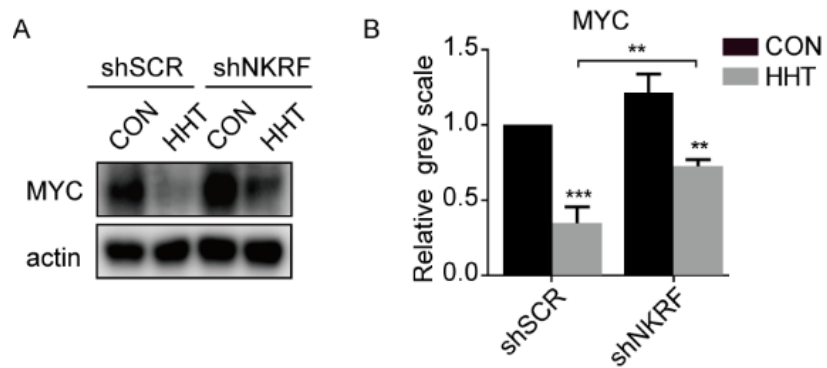

**Figure S14. HHT decreases *KIT* expression in consistence with *MYC* downregulation.**

(A) Clinical parameters and the expression of *MYC* and *KIT* normalized to *ABL1* gene for 37 de-novo AML samples were shown.

(B) The correlation between the expression of *MYC* and *KIT* in 37 primary de-novo AML samples from our clinical center (left panel) and 173 AML samples from TCGA database (right panel). Expression levels were presented as RSEM normalized log2 values of indicated genes. The correlation coefficient ( $r$ ) was measured by the Spearman correlation coefficients.

(C) Detection of mRNA and protein expression levels of *KIT* and *MYC* in Kasumi-1 and SKNO-1 cells treated with 200 nM JQ1 for 24 h: *KIT* mRNA expression level was detected with RT-qPCR and normalized to *GAPDH* gene expression (left panel); the protein expression of *MYC* and *KIT* were detected by Western blot (right panel).

(D) Kasumi-1 cells were transfected with shSCR or shMYC lentiviral vectors. *KIT* mRNA expression level was detected by RT-qPCR and normalized to *GAPDH* gene expression (left panel), *MYC* and *KIT* protein expression was detected by Western blot (right panel). \*\*\* $p < 0.001$ .

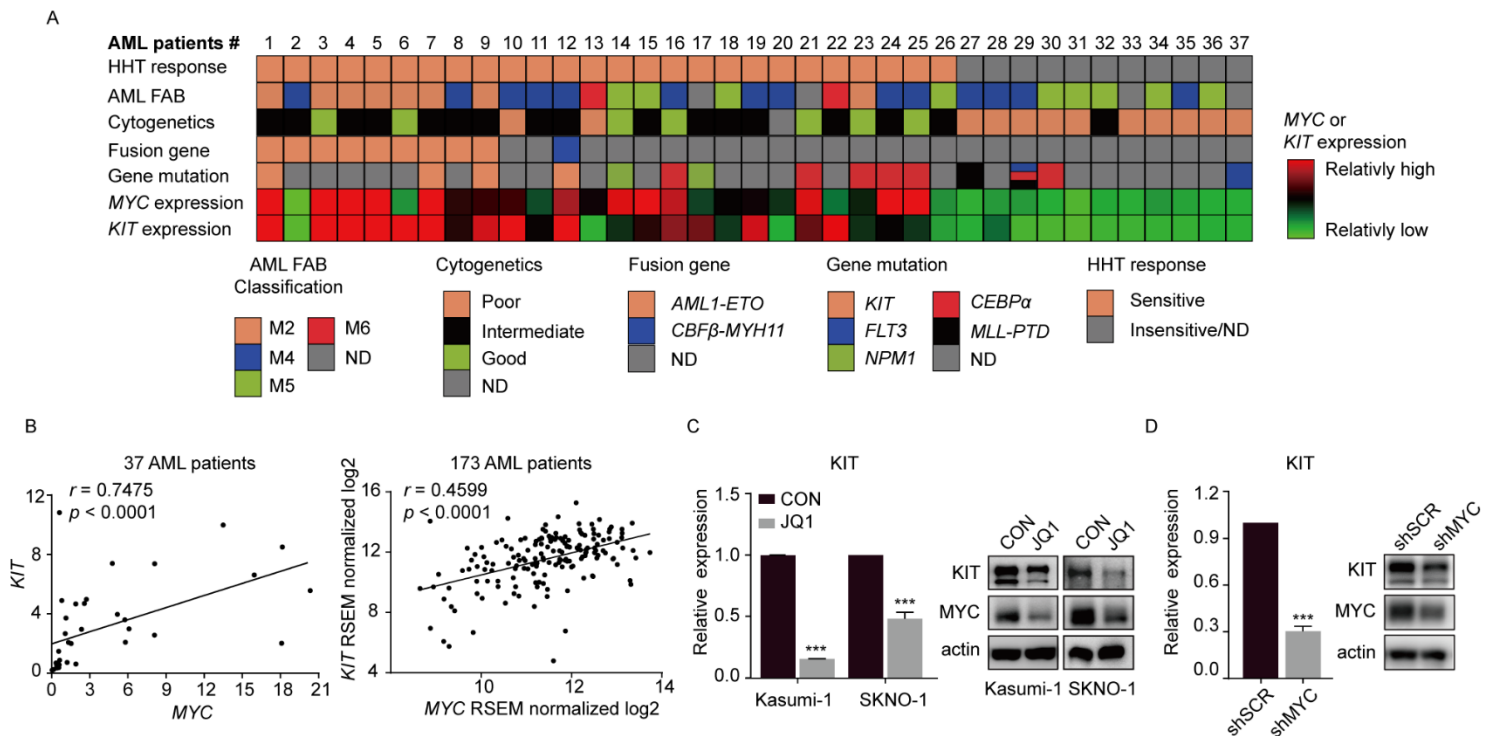

**Figure S15. NKRF knockdown diminishes HHT-induced cell-cycle blockage.**

Cell-cycle arrest of shSCR or shNKRF transfected Kasumi-1 cells treated with 20 nM HHT (upper panel), and shSCR or shNKRF transfected SKNO-1 cells treated with 40 nM HHT (bottom panel). The percentages of cells in each phase are indicated.

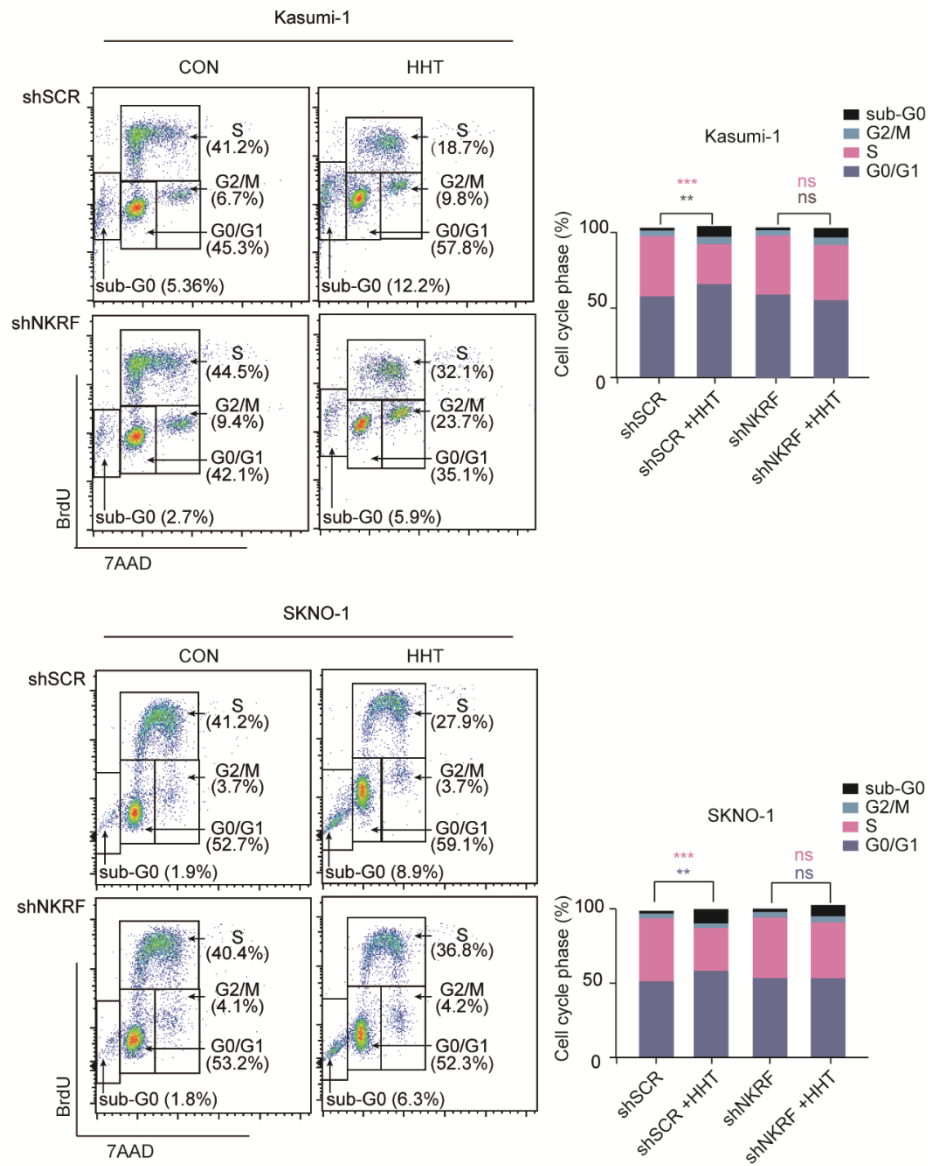



**Figure S16. Anti-leukemia effect of HHT mediated by NKRF *in vitro*.**

Viabilities of shSCR or shNKRF transfected Kasumi-1 (K-1) and SKNO-1 (S-1) cells treated with increasing doses of HHT. The data was based on mean  $\pm$  SEM of three independent experiments.

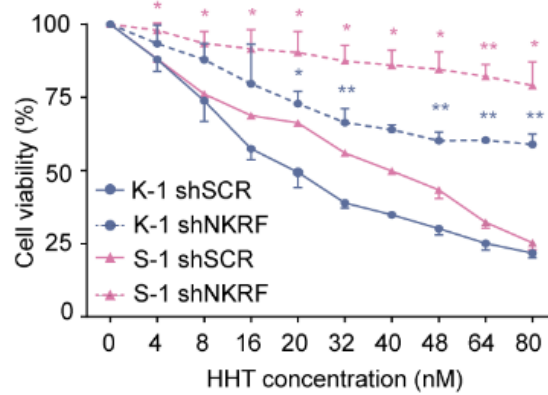

**Figure S17. NKRF does not directly bind to the promoter of *MYC*.**

ChIP-qPCR analysis of NKRF enriched transactivation region of *MYC* and *IL8* gene. Bars are mean  $\pm$  SD. *IL8* gene, which contains the specific negative regulatory elements on its promoter region, was reported to be a NKRF directly binding gene.<sup>5</sup> Here *IL8* gene was used as a positive control.

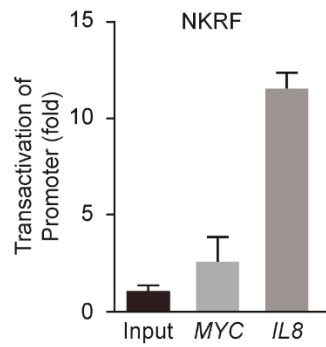

**Table S1.** Identification procedures of HHT specific binding proteins detected by ESI-Q-TOF MS/MS. (Uploaded as a separated file)

**Table S2.** Primer sequences used in this work. (Uploaded as a separated file)

## References

1. Gu Y, Zhou H, Gan Y, Zhang J, Chen J, Gan X, *et al.* Small-molecule induction of phospho-eIF4E sumoylation and degradation via targeting its phosphorylated serine 209 residue. *Oncotarget* 2015; **6**: 15111-15121.
2. Zhang HN, Yang L, Ling JY, Czajkowsky DM, Wang JF, Zhang XW, *et al.* Systematic identification of arsenic-binding proteins reveals that hexokinase-2 is inhibited by arsenic. *Proceedings of the National Academy of Sciences of the United States of America* 2015; **112**: 15084-15089.
3. Liu S, Wu LC, Pang J, Santhanam R, Schwind S, Wu YZ, *et al.* Sp1/NFkappaB/HDAC/miR-29b regulatory network in KIT-driven myeloid leukemia. *Cancer cell* 2010; **17**: 333-347.
4. Wang YY, Zhou GB, Yin T, Chen B, Shi JY, Liang WX, *et al.* AML1-ETO and C-KIT mutation/overexpression in t(8;21) leukemia: implication in stepwise leukemogenesis and response to Gleevec. *Proceedings of the National Academy of Sciences of the United States of America* 2005; **102**: 1104-1109.
5. Bartels M, Schweda AT, Dreikhausen U, Frank R, Resch K, Beil W, *et al.* Peptide-Mediated Disruption of NF  $\kappa$  B/NRF Interaction Inhibits IL-8 Gene Activation by IL-1 or Helicobacter pylori. *The Journal of Immunology* 2007; **179**: 7605-7613.

**Table S1. Identification procedures of HHT specific binding proteins detected by ESI-Q-TOF MS/MS.**

| <b>total prey proteins in bio-HHT group (2095 proteins)</b> |                   |                  |                           |
|-------------------------------------------------------------|-------------------|------------------|---------------------------|
| <b>prot_acc</b>                                             | <b>prot_score</b> | <b>prot_mass</b> | <b>prot_sequences_sig</b> |
| MYH9_HUMAN                                                  | 26838             | 227646           | 79                        |
| MYH10_HUMAN                                                 | 3248              | 229827           | 25                        |
| MYH11_HUMAN                                                 | 2595              | 228054           | 8                         |
| MYH14_HUMAN                                                 | 1278              | 228701           | 4                         |
| ACACA_HUMAN                                                 | 9468              | 267095           | 79                        |
| ACACB_HUMAN                                                 | 1631              | 278361           | 23                        |
| SPTB2_HUMAN                                                 | 3510              | 275237           | 54                        |
| SPTN2_HUMAN                                                 | 328               | 272526           | 5                         |
| SPTB1_HUMAN                                                 | 60                | 247171           | 1                         |
| MY18A_HUMAN                                                 | 3215              | 234168           | 39                        |
| SPTN1_HUMAN                                                 | 3014              | 285163           | 56                        |
| PRKDC_HUMAN                                                 | 1917              | 473749           | 59                        |
| MYO1G_HUMAN                                                 | 1910              | 117395           | 30                        |
| MYO1D_HUMAN                                                 | 35                | 116927           | 1                         |
| PARP1_HUMAN                                                 | 1676              | 113811           | 26                        |
| CLH1_HUMAN                                                  | 1590              | 193260           | 32                        |
| CLH2_HUMAN                                                  | 369               | 189020           | 8                         |
| MYO1F_HUMAN                                                 | 1589              | 125507           | 21                        |
| MYO1C_HUMAN                                                 | 274               | 122461           | 9                         |
| MYO1E_HUMAN                                                 | 323               | 127552           | 3                         |
| MYO1B_HUMAN                                                 | 90                | 132928           | 1                         |
| DHX9_HUMAN                                                  | 1566              | 142181           | 25                        |
| FAS_HUMAN                                                   | 1522              | 275877           | 41                        |
| PYC_HUMAN                                                   | 1408              | 130293           | 24                        |
| IQGA1_HUMAN                                                 | 1267              | 189761           | 34                        |
| IQGA2_HUMAN                                                 | 23                | 181036           | 2                         |
| IQGA3_HUMAN                                                 | 62                | 185268           | 2                         |
| PYR1_HUMAN                                                  | 1125              | 245167           | 27                        |
| HEAT1_HUMAN                                                 | 992               | 244382           | 30                        |
| FLII_HUMAN                                                  | 955               | 146142           | 21                        |
| K2C1_HUMAN                                                  | 944               | 66170            | 9                         |
| GFAP_HUMAN                                                  | 108               | 49907            | 1                         |
| NAT10_HUMAN                                                 | 829               | 116569           | 19                        |
| ACTG_HUMAN                                                  | 675               | 42108            | 9                         |
| ACTB_HUMAN                                                  | 628               | 42052            | 8                         |
| POTEE_HUMAN                                                 | 381               | 122882           | 3                         |
| ACTBL_HUMAN                                                 | 237               | 42318            | 3                         |
| ACTC_HUMAN                                                  | 222               | 42334            | 3                         |
| ACTA_HUMAN                                                  | 219               | 42381            | 2                         |
| ACTBM_HUMAN                                                 | 214               | 42331            | 2                         |
| POTEI_HUMAN                                                 | 21                | 122858           | 1                         |
| K1C10_HUMAN                                                 | 661               | 59020            | 9                         |
| TOP2B_HUMAN                                                 | 636               | 184122           | 19                        |
| TOP2A_HUMAN                                                 | 479               | 175017           | 15                        |
| HNRPU_HUMAN                                                 | 634               | 91269            | 7                         |
| BAZ1B_HUMAN                                                 | 617               | 172392           | 17                        |
| GCN1L_HUMAN                                                 | 617               | 294967           | 25                        |
| FLNB_HUMAN                                                  | 553               | 280157           | 24                        |
| FLNA_HUMAN                                                  | 52                | 283301           | 2                         |
| FLNC_HUMAN                                                  | 99                | 293407           | 2                         |
| IPO7_HUMAN                                                  | 551               | 120751           | 9                         |
| IPO8_HUMAN                                                  | 87                | 120945           | 1                         |
| U520_HUMAN                                                  | 538               | 246006           | 18                        |
| RRP5_HUMAN                                                  | 529               | 209939           | 17                        |
| SYIC_HUMAN                                                  | 523               | 145718           | 20                        |
| MBB1A_HUMAN                                                 | 512               | 149731           | 9                         |
| PRP8_HUMAN                                                  | 499               | 274738           | 19                        |
| XPO1_HUMAN                                                  | 495               | 124447           | 15                        |
| SMCA5_HUMAN                                                 | 495               | 122513           | 14                        |

|             |     |        |    |
|-------------|-----|--------|----|
| SMCA1_HUMAN | 137 | 123211 | 4  |
| U5S1_HUMAN  | 479 | 110336 | 14 |
| ACTN1_HUMAN | 470 | 103563 | 11 |
| ACTN4_HUMAN | 451 | 105245 | 9  |
| ACTN2_HUMAN | 151 | 104358 | 4  |
| ACTN3_HUMAN | 61  | 103917 | 3  |
| CNTRL_HUMAN | 468 | 269860 | 13 |
| FSCN1_HUMAN | 459 | 55123  | 9  |
| SPB1_HUMAN  | 455 | 96898  | 9  |
| NEB2_HUMAN  | 448 | 89309  | 10 |
| NEB1_HUMAN  | 79  | 123552 | 1  |
| NUCL_HUMAN  | 441 | 76625  | 6  |
| MSH6_HUMAN  | 438 | 154514 | 15 |
| DYHC1_HUMAN | 433 | 534809 | 20 |
| K22E_HUMAN  | 430 | 65678  | 5  |
| K2C6A_HUMAN | 151 | 60293  | 3  |
| K2C5_HUMAN  | 122 | 62568  | 2  |
| K22O_HUMAN  | 90  | 66370  | 1  |
| SF3B3_HUMAN | 427 | 136575 | 11 |
| XPO2_HUMAN  | 422 | 111145 | 12 |
| H2B1B_HUMAN | 192 | 13942  | 2  |
| H2B1A_HUMAN | 106 | 14159  | 1  |
| NEK10_HUMAN | 47  | 134145 | 1  |
| CU129_HUMAN | 40  | 15541  | 1  |
| LPPRC_HUMAN | 407 | 159003 | 16 |
| CB072_HUMAN | 30  | 30918  | 1  |
| UBA1_HUMAN  | 406 | 118858 | 9  |
| ENPL_HUMAN  | 401 | 92696  | 9  |
| SMHD1_HUMAN | 373 | 227942 | 7  |
| TLN1_HUMAN  | 354 | 271766 | 8  |
| PUR2_HUMAN  | 352 | 108953 | 13 |
| TBA1A_HUMAN | 338 | 50788  | 6  |
| TBA3C_HUMAN | 161 | 50612  | 4  |
| TBA4A_HUMAN | 108 | 50634  | 3  |
| TBA8_HUMAN  | 42  | 50746  | 2  |
| TBA4B_HUMAN | 20  | 27819  | 1  |
| ACLY_HUMAN  | 338 | 121674 | 10 |
| MATR3_HUMAN | 335 | 95078  | 4  |
| MYO5A_HUMAN | 329 | 216979 | 10 |
| MYO5B_HUMAN | 44  | 215135 | 1  |
| MYO5C_HUMAN | 39  | 203994 | 1  |
| UT14A_HUMAN | 324 | 88095  | 7  |
| UT14C_HUMAN | 118 | 87249  | 3  |
| C1TC_HUMAN  | 318 | 102180 | 10 |
| MCM3_HUMAN  | 314 | 91551  | 7  |
| SYLC_HUMAN  | 307 | 135577 | 12 |
| NOG2_HUMAN  | 306 | 83831  | 6  |
| DOCK2_HUMAN | 305 | 213123 | 13 |
| DHX30_HUMAN | 305 | 134938 | 15 |
| TOP1_HUMAN  | 299 | 91125  | 8  |
| TOP1M_HUMAN | 91  | 70398  | 2  |
| COPA_HUMAN  | 299 | 139797 | 14 |
| AT2A2_HUMAN | 297 | 116336 | 7  |
| AT2A3_HUMAN | 114 | 115444 | 1  |
| AT2A1_HUMAN | 64  | 111550 | 2  |
| H2AY_HUMAN  | 297 | 39764  | 7  |
| H2AW_HUMAN  | 92  | 40261  | 1  |
| RRP12_HUMAN | 287 | 145037 | 8  |
| NOL6_HUMAN  | 284 | 128368 | 8  |
| RFC1_HUMAN  | 278 | 128688 | 6  |
| TBB5_HUMAN  | 276 | 50095  | 7  |
| TBB4B_HUMAN | 255 | 50255  | 6  |
| TBB2A_HUMAN | 234 | 50274  | 5  |

|             |     |        |    |
|-------------|-----|--------|----|
| TBB3_HUMAN  | 233 | 50856  | 4  |
| TBB4A_HUMAN | 211 | 50010  | 5  |
| TBB1_HUMAN  | 178 | 50865  | 2  |
| CHD4_HUMAN  | 276 | 219407 | 8  |
| CHD5_HUMAN  | 72  | 224506 | 2  |
| CHD3_HUMAN  | 62  | 227989 | 2  |
| WDR3_HUMAN  | 273 | 107115 | 10 |
| UTP20_HUMAN | 270 | 320805 | 11 |
| SF3B1_HUMAN | 268 | 146479 | 11 |
| DDX21_HUMAN | 268 | 87804  | 8  |
| DDX50_HUMAN | 87  | 83084  | 2  |
| H4_HUMAN    | 257 | 11360  | 2  |
| WDR36_HUMAN | 256 | 106282 | 10 |
| XPOT_HUMAN  | 255 | 111148 | 5  |
| PO210_HUMAN | 249 | 205895 | 6  |
| SMC3_HUMAN  | 248 | 141853 | 9  |
| SYEP_HUMAN  | 247 | 172080 | 9  |
| TDIF2_HUMAN | 244 | 84817  | 6  |
| NOP2_HUMAN  | 243 | 89589  | 5  |
| HS90B_HUMAN | 236 | 83554  | 8  |
| HS90A_HUMAN | 187 | 85006  | 4  |
| TRAP1_HUMAN | 115 | 80345  | 1  |
| HS902_HUMAN | 48  | 39454  | 2  |
| H90B2_HUMAN | 43  | 44492  | 1  |
| H90B3_HUMAN | 37  | 68624  | 3  |
| HS904_HUMAN | 19  | 47796  | 1  |
| ATAD2_HUMAN | 234 | 159825 | 10 |
| ESYT1_HUMAN | 233 | 123293 | 6  |
| PWP2_HUMAN  | 228 | 103357 | 6  |
| GANAB_HUMAN | 225 | 107263 | 8  |
| NOP14_HUMAN | 225 | 98292  | 7  |
| NPA1P_HUMAN | 220 | 256508 | 11 |
| CAND1_HUMAN | 218 | 137999 | 7  |
| K1C9_HUMAN  | 218 | 62255  | 6  |
| DNLI3_HUMAN | 217 | 114317 | 8  |
| PELP1_HUMAN | 212 | 120879 | 7  |
| RPB2_HUMAN  | 209 | 135236 | 5  |
| COPB_HUMAN  | 207 | 108214 | 9  |
| LONM_HUMAN  | 206 | 106936 | 6  |
| NUMA1_HUMAN | 205 | 239199 | 10 |
| CROCC_HUMAN | 204 | 228787 | 8  |
| CROL2_HUMAN | 31  | 33656  | 1  |
| HXK2_HUMAN  | 203 | 103739 | 4  |
| HXK3_HUMAN  | 47  | 100616 | 1  |
| RENT1_HUMAN | 202 | 125578 | 9  |
| HSP74_HUMAN | 201 | 95127  | 5  |
| HS105_HUMAN | 187 | 97716  | 8  |
| HS74L_HUMAN | 36  | 95479  | 2  |
| CE128_HUMAN | 196 | 128565 | 5  |
| PERM_HUMAN  | 188 | 84784  | 7  |
| HYOU1_HUMAN | 187 | 111494 | 7  |
| SP16H_HUMAN | 187 | 120409 | 10 |
| SUGP2_HUMAN | 186 | 121044 | 9  |
| KI67_HUMAN  | 184 | 360698 | 6  |
| ILF3_HUMAN  | 183 | 95678  | 5  |
| STRBP_HUMAN | 23  | 74290  | 1  |
| AT1A1_HUMAN | 182 | 114135 | 6  |
| AT1A3_HUMAN | 113 | 113102 | 3  |
| AT1A2_HUMAN | 64  | 113505 | 2  |
| GELS_HUMAN  | 179 | 86043  | 7  |
| PSMD1_HUMAN | 174 | 106795 | 3  |
| MCM2_HUMAN  | 172 | 102516 | 7  |
| DSRAD_HUMAN | 162 | 137178 | 6  |

|             |     |        |   |
|-------------|-----|--------|---|
| UN13D_HUMAN | 160 | 124288 | 5 |
| XPO5_HUMAN  | 158 | 138332 | 3 |
| EF2_HUMAN   | 154 | 96246  | 7 |
| H15_HUMAN   | 153 | 22566  | 2 |
| SIPA1_HUMAN | 152 | 112821 | 4 |
| SMC2_HUMAN  | 152 | 136085 | 8 |
| DIAP1_HUMAN | 151 | 141942 | 7 |
| KIF23_HUMAN | 151 | 111016 | 6 |
| UHRF1_HUMAN | 150 | 91297  | 6 |
| SSFA2_HUMAN | 149 | 139554 | 3 |
| CYTSA_HUMAN | 143 | 124925 | 7 |
| SMC1A_HUMAN | 140 | 143771 | 8 |
| NU205_HUMAN | 138 | 230171 | 5 |
| EF1A1_HUMAN | 138 | 50451  | 4 |
| EF1A2_HUMAN | 31  | 50780  | 2 |
| MYPT1_HUMAN | 135 | 115610 | 5 |
| PP12C_HUMAN | 36  | 85286  | 1 |
| CP250_HUMAN | 134 | 281880 | 6 |
| PSA_HUMAN   | 134 | 103895 | 5 |
| PSAL_HUMAN  | 26  | 54226  | 1 |
| SYMC_HUMAN  | 134 | 102249 | 5 |
| CND3_HUMAN  | 133 | 115345 | 3 |
| BOP1_HUMAN  | 133 | 84261  | 5 |
| MSH2_HUMAN  | 131 | 105418 | 4 |
| HNRL1_HUMAN | 129 | 96250  | 3 |
| HNRL2_HUMAN | 129 | 85622  | 4 |
| MPRIP_HUMAN | 123 | 117260 | 7 |
| CEP89_HUMAN | 120 | 89934  | 1 |
| CEBPZ_HUMAN | 118 | 121526 | 3 |
| RBM19_HUMAN | 116 | 107722 | 4 |
| AAAT_HUMAN  | 114 | 57018  | 2 |
| URB2_HUMAN  | 114 | 172373 | 4 |
| PRP6_HUMAN  | 112 | 107656 | 5 |
| SND1_HUMAN  | 109 | 102618 | 4 |
| CND1_HUMAN  | 108 | 158508 | 4 |
| PDS5A_HUMAN | 107 | 152274 | 2 |
| WDR75_HUMAN | 105 | 95921  | 4 |
| MCM4_HUMAN  | 105 | 97068  | 4 |
| DPOD1_HUMAN | 102 | 125035 | 6 |
| MCM6_HUMAN  | 102 | 93801  | 2 |
| EIF3B_HUMAN | 102 | 92823  | 3 |
| BMS1_HUMAN  | 101 | 146571 | 4 |
| MCCA_HUMAN  | 99  | 80935  | 3 |
| PDIA1_HUMAN | 99  | 57480  | 3 |
| SYVC_HUMAN  | 99  | 141642 | 4 |
| PCNT_HUMAN  | 98  | 380600 | 4 |
| SYAC_HUMAN  | 98  | 107484 | 4 |
| CHD1L_HUMAN | 97  | 101491 | 4 |
| EIF3A_HUMAN | 97  | 166867 | 2 |
| STOM_HUMAN  | 95  | 31882  | 1 |
| RS27A_HUMAN | 95  | 18296  | 1 |
| COPG1_HUMAN | 93  | 98967  | 5 |
| COPG2_HUMAN | 58  | 98700  | 2 |
| NPM_HUMAN   | 93  | 32726  | 2 |
| DDB1_HUMAN  | 92  | 128142 | 4 |
| PYGL_HUMAN  | 90  | 97486  | 3 |
| PYGB_HUMAN  | 19  | 97319  | 1 |
| ALBU_HUMAN  | 89  | 71317  | 2 |
| NOC3L_HUMAN | 89  | 92946  | 2 |
| TBL3_HUMAN  | 89  | 90347  | 4 |
| NIPBL_HUMAN | 88  | 317907 | 5 |
| COR1C_HUMAN | 88  | 53899  | 2 |
| RSF1_HUMAN  | 87  | 165260 | 3 |



|             |    |        |   |
|-------------|----|--------|---|
| TBCD_HUMAN  | 84 | 134283 | 4 |
| SYNE3_HUMAN | 84 | 112774 | 1 |
| ELYS_HUMAN  | 83 | 254223 | 3 |
| NOP56_HUMAN | 82 | 66408  | 2 |
| ARHG2_HUMAN | 81 | 112386 | 5 |
| HUWE1_HUMAN | 80 | 485523 | 3 |
| RPB1_HUMAN  | 79 | 218408 | 3 |
| RBM28_HUMAN | 79 | 86198  | 2 |
| DDX23_HUMAN | 78 | 95866  | 3 |
| RAI14_HUMAN | 74 | 110601 | 4 |
| MPP10_HUMAN | 74 | 78930  | 3 |
| ITPR1_HUMAN | 73 | 317151 | 3 |
| ITPR2_HUMAN | 21 | 311060 | 1 |
| PR40A_HUMAN | 72 | 109022 | 2 |
| ADT3_HUMAN  | 71 | 33073  | 3 |
| ADT2_HUMAN  | 60 | 33059  | 3 |
| ADT1_HUMAN  | 36 | 33271  | 1 |
| RAD50_HUMAN | 70 | 154823 | 3 |
| SART3_HUMAN | 69 | 110721 | 4 |
| AKNA_HUMAN  | 69 | 155842 | 2 |
| PTPRC_HUMAN | 68 | 148644 | 1 |
| CP131_HUMAN | 67 | 122531 | 1 |
| NSUN2_HUMAN | 66 | 87214  | 4 |
| NOC2L_HUMAN | 66 | 85721  | 1 |
| NOL8_HUMAN  | 66 | 132448 | 1 |
| NNTM_HUMAN  | 64 | 114564 | 2 |
| ECM29_HUMAN | 64 | 205985 | 3 |
| DDX54_HUMAN | 62 | 98819  | 5 |
| CDC5L_HUMAN | 62 | 92422  | 1 |
| ESF1_HUMAN  | 60 | 99134  | 2 |
| MICA3_HUMAN | 60 | 225297 | 4 |
| IPO9_HUMAN  | 59 | 116858 | 2 |
| KDM1A_HUMAN | 59 | 93358  | 2 |
| HNRPM_HUMAN | 58 | 77749  | 2 |
| XRN2_HUMAN  | 57 | 109426 | 4 |
| RPA2_HUMAN  | 57 | 129799 | 1 |
| TCOF_HUMAN  | 57 | 152243 | 1 |
| IPO5_HUMAN  | 56 | 125032 | 5 |
| RNBP6_HUMAN | 24 | 126173 | 1 |
| LARP1_HUMAN | 55 | 123833 | 2 |
| SF3B2_HUMAN | 55 | 100279 | 1 |
| XPC_HUMAN   | 55 | 106743 | 4 |
| RAD21_HUMAN | 55 | 71930  | 1 |
| OSBL8_HUMAN | 54 | 101759 | 1 |
| AP3D1_HUMAN | 54 | 131159 | 2 |
| DHX37_HUMAN | 54 | 130547 | 1 |
| RL1D1_HUMAN | 53 | 55167  | 1 |
| K1C14_HUMAN | 53 | 51872  | 1 |
| DDX27_HUMAN | 53 | 90292  | 2 |
| EXOC4_HUMAN | 52 | 111170 | 1 |
| MDC1_HUMAN  | 52 | 227669 | 4 |
| RL6_HUMAN   | 52 | 32765  | 1 |
| DCTN1_HUMAN | 51 | 142348 | 1 |
| COPB2_HUMAN | 51 | 103278 | 4 |
| RPOM_HUMAN  | 50 | 140300 | 1 |
| EIFCL_HUMAN | 50 | 106091 | 2 |
| KIT_HUMAN   | 50 | 111163 | 2 |
| NOP58_HUMAN | 50 | 60054  | 2 |
| CE192_HUMAN | 50 | 215180 | 1 |
| SFPQ_HUMAN  | 49 | 76216  | 2 |
| MCCB_HUMAN  | 49 | 61808  | 5 |
| MYO9B_HUMAN | 49 | 244846 | 2 |
| PTSS1_HUMAN | 49 | 56175  | 1 |

|             |    |        |   |
|-------------|----|--------|---|
| TFR1_HUMAN  | 49 | 85274  | 2 |
| DNMT1_HUMAN | 49 | 185388 | 2 |
| SRGP1_HUMAN | 49 | 125099 | 1 |
| SR140_HUMAN | 49 | 118675 | 3 |
| DYN2_HUMAN  | 49 | 98345  | 3 |
| DYN1_HUMAN  | 35 | 97746  | 1 |
| F120A_HUMAN | 48 | 123008 | 3 |
| SAFB1_HUMAN | 48 | 103036 | 2 |
| SAFB2_HUMAN | 42 | 107921 | 1 |
| VAV_HUMAN   | 48 | 99677  | 2 |
| VAV3_HUMAN  | 26 | 99082  | 1 |
| RPTOR_HUMAN | 48 | 150653 | 1 |
| SMC4_HUMAN  | 48 | 147775 | 3 |
| RBM5_HUMAN  | 47 | 92610  | 1 |
| CENPC_HUMAN | 47 | 107396 | 1 |
| SVIL_HUMAN  | 46 | 249417 | 2 |
| SON_HUMAN   | 46 | 264063 | 1 |
| AKAP9_HUMAN | 45 | 455725 | 1 |
| CE120_HUMAN | 45 | 113198 | 1 |
| SRRM1_HUMAN | 45 | 102331 | 2 |
| GTF2I_HUMAN | 45 | 112859 | 2 |
| FILA2_HUMAN | 45 | 249296 | 1 |
| SYIM_HUMAN  | 45 | 114688 | 2 |
| H2A1B_HUMAN | 45 | 14127  | 1 |
| IF2P_HUMAN  | 44 | 139198 | 2 |
| TPR_HUMAN   | 44 | 267530 | 2 |
| BRD1_HUMAN  | 44 | 121554 | 1 |
| TTLL7_HUMAN | 43 | 103846 | 1 |
| PCM1_HUMAN  | 43 | 230046 | 1 |
| IREB2_HUMAN | 42 | 106004 | 1 |
| XRCC6_HUMAN | 41 | 70084  | 3 |
| SF3A1_HUMAN | 41 | 88888  | 1 |
| XRCC5_HUMAN | 41 | 83222  | 4 |
| SPTA3_HUMAN | 41 | 21572  | 1 |
| HP1B3_HUMAN | 41 | 61454  | 1 |
| HNRPC_HUMAN | 40 | 33707  | 2 |
| HNRC1_HUMAN | 39 | 32180  | 1 |
| HSP72_HUMAN | 40 | 70263  | 1 |
| SMRC2_HUMAN | 40 | 133196 | 1 |
| MMS19_HUMAN | 40 | 114928 | 1 |
| HLTF_HUMAN  | 40 | 114883 | 3 |
| RB12B_HUMAN | 40 | 118372 | 2 |
| ABCF1_HUMAN | 39 | 96323  | 2 |
| TIF1B_HUMAN | 39 | 90261  | 2 |
| TERA_HUMAN  | 39 | 89950  | 1 |
| PFKAL_HUMAN | 38 | 85762  | 1 |
| BRPF1_HUMAN | 38 | 139066 | 1 |
| CHERP_HUMAN | 38 | 104150 | 2 |
| SK2L2_HUMAN | 38 | 118756 | 2 |
| KIF14_HUMAN | 37 | 187743 | 1 |
| HNRPK_HUMAN | 37 | 51230  | 1 |
| RPN2_HUMAN  | 37 | 69355  | 1 |
| PDC6I_HUMAN | 37 | 96590  | 2 |
| TCRG1_HUMAN | 37 | 124051 | 1 |
| ACINU_HUMAN | 36 | 152170 | 2 |
| HACD3_HUMAN | 36 | 43360  | 1 |
| SSH1_HUMAN  | 36 | 116465 | 1 |
| SPICE_HUMAN | 36 | 96548  | 1 |
| THOC2_HUMAN | 36 | 184541 | 2 |
| TECR_HUMAN  | 36 | 36410  | 1 |
| RRS1_HUMAN  | 36 | 41225  | 1 |
| RICTR_HUMAN | 36 | 194207 | 2 |
| GEMI4_HUMAN | 35 | 121728 | 2 |

|             |    |        |   |
|-------------|----|--------|---|
| CYFP1_HUMAN | 35 | 146742 | 1 |
| KIF11_HUMAN | 35 | 120111 | 1 |
| PHF14_HUMAN | 34 | 101815 | 1 |
| IPO4_HUMAN  | 34 | 120179 | 2 |
| HNRPF_HUMAN | 34 | 45985  | 1 |
| KRI1_HUMAN  | 34 | 83004  | 1 |
| C170L_HUMAN | 34 | 32628  | 1 |
| PDS5B_HUMAN | 34 | 165818 | 2 |
| MYADM_HUMAN | 34 | 36049  | 1 |
| WRN_HUMAN   | 33 | 164410 | 1 |
| NU160_HUMAN | 33 | 164355 | 1 |
| NXN_HUMAN   | 33 | 48761  | 1 |
| UGGG1_HUMAN | 33 | 177819 | 1 |
| DREB_HUMAN  | 33 | 71842  | 1 |
| MAPK2_HUMAN | 32 | 45938  | 1 |
| STAR7_HUMAN | 32 | 43257  | 1 |
| SSH2_HUMAN  | 32 | 159770 | 2 |
| SHIP1_HUMAN | 32 | 134121 | 1 |
| IPO11_HUMAN | 32 | 113489 | 1 |
| DDX24_HUMAN | 31 | 96899  | 1 |
| CHD1_HUMAN  | 31 | 197707 | 2 |
| CHD6_HUMAN  | 23 | 308071 | 1 |
| FANCI_HUMAN | 31 | 150769 | 1 |
| DDX10_HUMAN | 30 | 101168 | 2 |
| IDE_HUMAN   | 30 | 118692 | 1 |
| ERAP1_HUMAN | 30 | 107736 | 2 |
| COR1A_HUMAN | 30 | 51678  | 1 |
| MAP1S_HUMAN | 30 | 113111 | 1 |
| CK5P2_HUMAN | 30 | 216444 | 3 |
| RB15B_HUMAN | 29 | 97432  | 1 |
| RL13_HUMAN  | 29 | 24304  | 1 |
| WIZ_HUMAN   | 29 | 180217 | 1 |
| DDX5_HUMAN  | 29 | 69618  | 1 |
| DDX3X_HUMAN | 29 | 73597  | 1 |
| ATD2B_HUMAN | 29 | 166351 | 1 |
| VIGLN_HUMAN | 29 | 141995 | 1 |
| MYL6_HUMAN  | 28 | 17090  | 1 |
| DKC1_HUMAN  | 28 | 58094  | 1 |
| YS043_HUMAN | 28 | 23372  | 1 |
| CKAP5_HUMAN | 28 | 227062 | 1 |
| TPM1_HUMAN  | 28 | 32746  | 1 |
| BAZ1A_HUMAN | 27 | 180246 | 1 |
| DGKZ_HUMAN  | 27 | 125704 | 1 |
| XPO7_HUMAN  | 27 | 125196 | 1 |
| USO1_HUMAN  | 27 | 108740 | 1 |
| RBP2_HUMAN  | 26 | 362365 | 2 |
| WAPL_HUMAN  | 26 | 134516 | 1 |
| CWC22_HUMAN | 26 | 105972 | 1 |
| NCKPL_HUMAN | 26 | 129554 | 1 |
| PI4KA_HUMAN | 25 | 233622 | 1 |
| STRUM_HUMAN | 25 | 135113 | 1 |
| CD44_HUMAN  | 25 | 82001  | 1 |
| LBR_HUMAN   | 25 | 71057  | 1 |
| VIP2_HUMAN  | 24 | 141573 | 1 |
| JCAD_HUMAN  | 24 | 149343 | 1 |
| PLCA_HUMAN  | 24 | 32038  | 1 |
| LUZP1_HUMAN | 24 | 120772 | 1 |
| CTNB1_HUMAN | 24 | 86069  | 1 |
| MAP4_HUMAN  | 23 | 121443 | 1 |
| ITB1_HUMAN  | 23 | 91664  | 1 |
| VTA1_HUMAN  | 23 | 34143  | 1 |
| AL2SB_HUMAN | 22 | 52748  | 1 |
| RN213_HUMAN | 22 | 598557 | 1 |

|             |      |        |    |
|-------------|------|--------|----|
| K1875_HUMAN | 22   | 182416 | 1  |
| USP9X_HUMAN | 22   | 295515 | 1  |
| 4F2_HUMAN   | 21   | 68180  | 1  |
| CD34_HUMAN  | 21   | 41091  | 1  |
| SPT6H_HUMAN | 21   | 200203 | 1  |
| E41L2_HUMAN | 21   | 113032 | 1  |
| PRDM1_HUMAN | 20   | 92966  | 1  |
| PININ_HUMAN | 20   | 81679  | 1  |
| HXK1_HUMAN  | 20   | 103561 | 1  |
| DEUP1_HUMAN | 20   | 71503  | 1  |
| HBB_HUMAN   | 20   | 16102  | 1  |
| SMCA4_HUMAN | 20   | 185100 | 1  |
| STT3B_HUMAN | 20   | 94241  | 1  |
| S2548_HUMAN | 19   | 33817  | 1  |
| MFN2_HUMAN  | 19   | 87088  | 1  |
| RPC2_HUMAN  | 19   | 129242 | 1  |
| APC_HUMAN   | 19   | 313622 | 1  |
| OIT3_HUMAN  | 18   | 62206  | 1  |
| CC151_HUMAN | 18   | 69268  | 1  |
| DX39A_HUMAN | 18   | 49611  | 1  |
| AT12A_HUMAN | 18   | 116292 | 1  |
| NDUAA_HUMAN | 17   | 41067  | 1  |
| KPYM_HUMAN  | 17   | 58470  | 1  |
| CHSS1_HUMAN | 17   | 92353  | 1  |
| AMPN_HUMAN  | 17   | 109870 | 1  |
| UBR5_HUMAN  | 17   | 312352 | 1  |
| RB_HUMAN    | 17   | 106947 | 1  |
| SMRC1_HUMAN | 17   | 123303 | 1  |
| ATRX_HUMAN  | 17   | 284863 | 1  |
| PTRF_HUMAN  | 16   | 43450  | 1  |
| LRFN5_HUMAN | 16   | 80421  | 1  |
| PAK2_HUMAN  | 16   | 58291  | 1  |
| TAOK2_HUMAN | 16   | 138964 | 1  |
| CLIC1_HUMAN | 16   | 27248  | 1  |
| SMG7_HUMAN  | 16   | 127886 | 1  |
| MA7D1_HUMAN | 15   | 93106  | 1  |
| RBM25_HUMAN | 15   | 100467 | 1  |
| TRIPB_HUMAN | 15   | 228131 | 1  |
| TTL13_HUMAN | 15   | 94954  | 1  |
| HS905_HUMAN | 161  | 38942  | 2  |
| XPP3_HUMAN  | 113  | 57624  | 1  |
| PERE_HUMAN  | 65   | 81958  | 1  |
| IMB1_HUMAN  | 2721 | 98420  | 12 |
| MCM7_HUMAN  | 2311 | 81884  | 22 |
| RN123_HUMAN | 32   | 149960 | 1  |
| PFKAP_HUMAN | 2163 | 86454  | 16 |
| PFKAM_HUMAN | 138  | 85984  | 1  |
| K2C79_HUMAN | 319  | 58085  | 2  |
| K2C1B_HUMAN | 245  | 62149  | 1  |
| DHX15_HUMAN | 1451 | 91673  | 18 |
| DHX16_HUMAN | 42   | 119874 | 1  |
| KATL2_HUMAN | 51   | 61557  | 1  |
| MCM5_HUMAN  | 886  | 83031  | 16 |
| PSMD2_HUMAN | 850  | 100877 | 11 |
| POTEF_HUMAN | 222  | 123020 | 2  |
| PYGM_HUMAN  | 208  | 97487  | 4  |
| SYTC_HUMAN  | 595  | 84294  | 15 |
| SYTC2_HUMAN | 98   | 93613  | 1  |
| NOL11_HUMAN | 563  | 82041  | 11 |
| SUZ12_HUMAN | 557  | 83744  | 6  |
| TEX10_HUMAN | 547  | 106349 | 11 |
| H2B1C_HUMAN | 495  | 13898  | 2  |
| H2B2C_HUMAN | 53   | 21971  | 1  |

|             |     |        |    |
|-------------|-----|--------|----|
| AATF_HUMAN  | 526 | 63208  | 12 |
| EFR3A_HUMAN | 513 | 93777  | 13 |
| SSRP1_HUMAN | 496 | 81367  | 10 |
| HNRPR_HUMAN | 493 | 71184  | 9  |
| HNRPQ_HUMAN | 81  | 69788  | 4  |
| SYQ_HUMAN   | 457 | 88655  | 13 |
| CALX_HUMAN  | 452 | 67982  | 6  |
| RRP1B_HUMAN | 427 | 84774  | 6  |
| MIC60_HUMAN | 425 | 84026  | 8  |
| TNPO1_HUMAN | 396 | 103771 | 12 |
| TNPO2_HUMAN | 180 | 102862 | 3  |
| LAS1L_HUMAN | 386 | 83982  | 11 |
| TBA1B_HUMAN | 376 | 50804  | 8  |
| TBA1C_HUMAN | 359 | 50548  | 1  |
| ODFP2_HUMAN | 371 | 96140  | 10 |
| TRFM_HUMAN  | 360 | 81760  | 8  |
| ESYT2_HUMAN | 359 | 102807 | 11 |
| UBF1_HUMAN  | 355 | 89692  | 8  |
| VPS35_HUMAN | 354 | 92447  | 8  |
| DDX1_HUMAN  | 311 | 83349  | 11 |
| IF16_HUMAN  | 311 | 88656  | 6  |
| IFIX_HUMAN  | 159 | 55316  | 2  |
| STAT3_HUMAN | 292 | 88810  | 9  |
| NUP93_HUMAN | 290 | 93943  | 11 |
| MOGS_HUMAN  | 277 | 92032  | 5  |
| DDX51_HUMAN | 261 | 72983  | 8  |
| TBK1_HUMAN  | 257 | 84216  | 8  |
| NCBP1_HUMAN | 242 | 92864  | 8  |
| DAAF5_HUMAN | 214 | 94774  | 9  |
| H2A1A_HUMAN | 70  | 14225  | 1  |
| LIMA1_HUMAN | 198 | 85630  | 4  |
| PLOD1_HUMAN | 193 | 84068  | 7  |
| GYS1_HUMAN  | 183 | 84531  | 5  |
| GYS2_HUMAN  | 95  | 81565  | 1  |
| ZW10_HUMAN  | 183 | 89628  | 7  |
| HSP7C_HUMAN | 181 | 71082  | 6  |
| GRP78_HUMAN | 80  | 72402  | 3  |
| HS71L_HUMAN | 97  | 70730  | 2  |
| OPA1_HUMAN  | 180 | 112131 | 9  |
| STA5A_HUMAN | 179 | 91161  | 6  |
| STA5B_HUMAN | 132 | 90323  | 6  |
| PNPT1_HUMAN | 169 | 86524  | 6  |
| TTC27_HUMAN | 155 | 97883  | 4  |
| IF4G2_HUMAN | 155 | 102810 | 8  |
| P5CS_HUMAN  | 154 | 87989  | 7  |
| CUL4A_HUMAN | 151 | 88138  | 4  |
| CSDE1_HUMAN | 149 | 89684  | 8  |
| KS6A4_HUMAN | 146 | 86122  | 5  |
| KS6A5_HUMAN | 46  | 90379  | 1  |
| TNPO3_HUMAN | 145 | 105961 | 6  |
| K1C15_HUMAN | 53  | 49409  | 1  |
| GLU2B_HUMAN | 132 | 60357  | 4  |
| H12_HUMAN   | 128 | 21352  | 1  |
| ARHG6_HUMAN | 124 | 88698  | 5  |
| ARHG7_HUMAN | 68  | 90868  | 2  |
| LOXL3_HUMAN | 123 | 85280  | 4  |
| FUBP2_HUMAN | 122 | 73355  | 6  |
| MRE11_HUMAN | 121 | 80885  | 4  |
| DDX18_HUMAN | 118 | 75702  | 4  |
| XRCC1_HUMAN | 112 | 69776  | 3  |
| AKP8L_HUMAN | 112 | 72060  | 3  |
| EZH2_HUMAN  | 104 | 87247  | 3  |
| RPA34_HUMAN | 104 | 55236  | 7  |

|             |     |        |   |
|-------------|-----|--------|---|
| WRIP1_HUMAN | 100 | 72829  | 6 |
| EXOC6_HUMAN | 98  | 94404  | 4 |
| AP1G1_HUMAN | 98  | 92148  | 2 |
| NUP98_HUMAN | 96  | 198597 | 3 |
| DDX17_HUMAN | 92  | 80906  | 3 |
| A16A1_HUMAN | 89  | 86100  | 3 |
| RFTN1_HUMAN | 89  | 63677  | 1 |
| RIR1_HUMAN  | 87  | 90925  | 4 |
| ARBK1_HUMAN | 85  | 80321  | 3 |
| ARBK2_HUMAN | 47  | 80685  | 1 |
| GMEB1_HUMAN | 48  | 62894  | 1 |
| UN45A_HUMAN | 84  | 104266 | 1 |
| RUNX1_HUMAN | 84  | 48877  | 2 |
| DDX31_HUMAN | 80  | 94770  | 3 |
| SDA1_HUMAN  | 80  | 80277  | 4 |
| SC23A_HUMAN | 80  | 87018  | 3 |
| SC23B_HUMAN | 65  | 87393  | 3 |
| UFL1_HUMAN  | 79  | 89996  | 6 |
| EGLN_HUMAN  | 78  | 71559  | 1 |
| NOL10_HUMAN | 76  | 80822  | 3 |
| CUL1_HUMAN  | 76  | 90306  | 3 |
| STAT1_HUMAN | 72  | 87850  | 4 |
| PLCZ1_HUMAN | 68  | 70880  | 1 |
| EI2BE_HUMAN | 68  | 81071  | 1 |
| AB1IP_HUMAN | 68  | 73593  | 2 |
| NOL9_HUMAN  | 67  | 80527  | 2 |
| CIP2A_HUMAN | 66  | 103318 | 1 |
| VPS51_HUMAN | 65  | 86901  | 3 |
| TBCD5_HUMAN | 63  | 89519  | 3 |
| KS6A3_HUMAN | 63  | 84025  | 4 |
| KS6A2_HUMAN | 30  | 83642  | 2 |
| TELO2_HUMAN | 57  | 92430  | 2 |
| AKAP8_HUMAN | 56  | 76631  | 3 |
| ACON_HUMAN  | 56  | 86113  | 2 |
| NUP88_HUMAN | 54  | 84629  | 1 |
| NKRF_HUMAN  | 54  | 78308  | 2 |
| IL1AP_HUMAN | 50  | 66118  | 3 |
| CEP78_HUMAN | 48  | 77204  | 3 |
| CEP83_HUMAN | 48  | 82180  | 4 |
| LETM1_HUMAN | 47  | 83986  | 2 |
| GNL3_HUMAN  | 45  | 62468  | 1 |
| EZRI_HUMAN  | 44  | 69484  | 2 |
| PESC_HUMAN  | 43  | 68359  | 2 |
| KDM1B_HUMAN | 43  | 93465  | 2 |
| MTG8_HUMAN  | 42  | 68323  | 2 |
| SYCC_HUMAN  | 41  | 86103  | 1 |
| NSMA3_HUMAN | 40  | 94033  | 3 |
| TRI41_HUMAN | 40  | 72708  | 2 |
| VPS16_HUMAN | 39  | 95660  | 2 |
| THOC1_HUMAN | 38  | 76360  | 2 |
| MBD1_HUMAN  | 38  | 68788  | 2 |
| AGAP2_HUMAN | 37  | 125396 | 1 |
| PRC2B_HUMAN | 36  | 243958 | 1 |
| SAE2_HUMAN  | 36  | 71749  | 1 |
| IFT74_HUMAN | 36  | 69310  | 1 |
| KI2L2_HUMAN | 35  | 38961  | 1 |
| ROCK2_HUMAN | 35  | 161939 | 1 |
| SCAFB_HUMAN | 34  | 166319 | 1 |
| MTA1_HUMAN  | 34  | 81420  | 1 |
| P3H1_HUMAN  | 33  | 84196  | 1 |
| WBP11_HUMAN | 33  | 69954  | 2 |
| FUS_HUMAN   | 33  | 53622  | 1 |
| AGO1_HUMAN  | 32  | 98293  | 1 |

|             |    |        |   |
|-------------|----|--------|---|
| TF3C4_HUMAN | 32 | 93235  | 1 |
| PDXD1_HUMAN | 32 | 87565  | 1 |
| OS9_HUMAN   | 32 | 75971  | 1 |
| PRPF3_HUMAN | 31 | 77652  | 1 |
| AP1G2_HUMAN | 31 | 87917  | 1 |
| SYC2L_HUMAN | 30 | 94054  | 1 |
| EWS_HUMAN   | 30 | 68721  | 1 |
| KAT7_HUMAN  | 30 | 71282  | 1 |
| AAR2_HUMAN  | 30 | 43843  | 1 |
| LRIF1_HUMAN | 29 | 84744  | 1 |
| NOG1_HUMAN  | 28 | 74317  | 1 |
| SUV3_HUMAN  | 28 | 88791  | 2 |
| RAGP1_HUMAN | 28 | 63958  | 1 |
| TTL12_HUMAN | 28 | 75154  | 2 |
| TGFA1_HUMAN | 28 | 98236  | 1 |
| APC4_HUMAN  | 27 | 92856  | 1 |
| VINC_HUMAN  | 27 | 124292 | 1 |
| SC24C_HUMAN | 27 | 119789 | 1 |
| CPT1A_HUMAN | 27 | 88995  | 2 |
| NAA15_HUMAN | 26 | 102462 | 1 |
| RIN1_HUMAN  | 25 | 84902  | 1 |
| PLOD3_HUMAN | 25 | 85302  | 1 |
| THRB_HUMAN  | 25 | 71475  | 1 |
| TPRN_HUMAN  | 25 | 75795  | 1 |
| Z280C_HUMAN | 24 | 84867  | 1 |
| ACOC_HUMAN  | 24 | 98850  | 1 |
| NEK9_HUMAN  | 24 | 108868 | 1 |
| EPG5_HUMAN  | 23 | 295201 | 1 |
| PANK4_HUMAN | 23 | 86621  | 1 |
| RUFY1_HUMAN | 23 | 80851  | 1 |
| VILI_HUMAN  | 22 | 93093  | 1 |
| PRIC3_HUMAN | 22 | 70789  | 1 |
| SYF1_HUMAN  | 22 | 100745 | 1 |
| ARNT2_HUMAN | 22 | 79268  | 1 |
| PIBF1_HUMAN | 22 | 90035  | 1 |
| RL4_HUMAN   | 22 | 47953  | 2 |
| CQ085_HUMAN | 21 | 70663  | 1 |
| NATD1_HUMAN | 21 | 13195  | 1 |
| C2C4A_HUMAN | 21 | 40346  | 1 |
| PSIP1_HUMAN | 20 | 60181  | 1 |
| MARK2_HUMAN | 20 | 88255  | 1 |
| CACO1_HUMAN | 20 | 77745  | 1 |
| ACAP2_HUMAN | 20 | 88943  | 1 |
| NR3L1_HUMAN | 20 | 51536  | 1 |
| F179B_HUMAN | 20 | 190611 | 1 |
| AFAD_HUMAN  | 19 | 207702 | 1 |
| GTPB1_HUMAN | 19 | 73035  | 1 |
| ZFP91_HUMAN | 19 | 64261  | 1 |
| FOXK1_HUMAN | 19 | 75867  | 1 |
| SCLT1_HUMAN | 19 | 81203  | 1 |
| CCDC9_HUMAN | 18 | 59781  | 1 |
| RL18_HUMAN  | 18 | 21735  | 1 |
| PML_HUMAN   | 18 | 99143  | 1 |
| UBP5_HUMAN  | 18 | 96638  | 1 |
| PI3R4_HUMAN | 18 | 154318 | 1 |
| ATPA_HUMAN  | 18 | 59828  | 1 |
| CP2CJ_HUMAN | 18 | 56636  | 1 |
| ACADV_HUMAN | 18 | 70745  | 1 |
| LRRK2_HUMAN | 18 | 289568 | 1 |
| ARI3B_HUMAN | 17 | 60714  | 1 |
| HEY2_HUMAN  | 17 | 36071  | 1 |
| ZSC30_HUMAN | 17 | 57469  | 1 |
| C4BPA_HUMAN | 17 | 69042  | 1 |

|             |      |        |    |
|-------------|------|--------|----|
| F91A1_HUMAN | 17   | 94648  | 1  |
| MIO_HUMAN   | 17   | 100232 | 1  |
| PLCL1_HUMAN | 17   | 124360 | 1  |
| MYH7_HUMAN  | 16   | 223757 | 1  |
| RA1L2_HUMAN | 16   | 34375  | 1  |
| SCRN3_HUMAN | 16   | 48969  | 1  |
| COBL_HUMAN  | 16   | 136446 | 1  |
| LAR4B_HUMAN | 15   | 80902  | 1  |
| IQCE_HUMAN  | 15   | 77649  | 1  |
| HSP71_HUMAN | 888  | 70294  | 12 |
| HSP76_HUMAN | 530  | 71440  | 4  |
| HSP77_HUMAN | 279  | 40448  | 1  |
| GRP75_HUMAN | 1891 | 73920  | 14 |
| K2C72_HUMAN | 45   | 56470  | 1  |
| K2C6B_HUMAN | 295  | 60315  | 1  |
| K2C75_HUMAN | 216  | 59809  | 3  |
| K2C7_HUMAN  | 161  | 51411  | 1  |
| K2C71_HUMAN | 21   | 57769  | 1  |
| DDX3Y_HUMAN | 492  | 73564  | 7  |
| ANXA6_HUMAN | 1187 | 76168  | 15 |
| PABP1_HUMAN | 1153 | 70854  | 11 |
| PABP4_HUMAN | 396  | 71080  | 4  |
| PABP3_HUMAN | 606  | 70215  | 5  |
| PAP1L_HUMAN | 136  | 68976  | 2  |
| PAP1M_HUMAN | 96   | 22956  | 1  |
| K0020_HUMAN | 813  | 73937  | 16 |
| GRM1C_HUMAN | 65   | 76273  | 1  |
| SYRC_HUMAN  | 801  | 76129  | 16 |
| MOES_HUMAN  | 796  | 67892  | 15 |
| RADI_HUMAN  | 297  | 68635  | 6  |
| IF2B2_HUMAN | 703  | 66195  | 11 |
| IF2B3_HUMAN | 409  | 64008  | 10 |
| IF2B1_HUMAN | 83   | 63783  | 2  |
| GLGB_HUMAN  | 655  | 80879  | 14 |
| ECHA_HUMAN  | 616  | 83688  | 12 |
| RPN1_HUMAN  | 581  | 68641  | 13 |
| WDR46_HUMAN | 533  | 68485  | 12 |
| BTK_HUMAN   | 523  | 76917  | 11 |
| PYRG1_HUMAN | 519  | 67332  | 10 |
| PYRG2_HUMAN | 99   | 66320  | 1  |
| RBM14_HUMAN | 509  | 69620  | 6  |
| URP2_HUMAN  | 500  | 76475  | 14 |
| NSF_HUMAN   | 475  | 83055  | 10 |
| TKT_HUMAN   | 470  | 68519  | 9  |
| CIR1A_HUMAN | 466  | 77526  | 8  |
| GT251_HUMAN | 432  | 71933  | 9  |
| LMNB1_HUMAN | 431  | 66653  | 7  |
| PCKGM_HUMAN | 378  | 71483  | 12 |
| PCKGC_HUMAN | 49   | 69948  | 1  |
| ACSL4_HUMAN | 376  | 80220  | 11 |
| ACSL3_HUMAN | 108  | 81338  | 3  |
| AFG32_HUMAN | 373  | 88984  | 8  |
| MTA2_HUMAN  | 363  | 75717  | 9  |
| MTA3_HUMAN  | 45   | 68202  | 1  |
| CMC1_HUMAN  | 324  | 75114  | 9  |
| CMC2_HUMAN  | 219  | 74528  | 8  |
| WDR43_HUMAN | 323  | 75813  | 7  |
| RGAP1_HUMAN | 320  | 71666  | 8  |
| K1H1_HUMAN  | 315  | 48633  | 1  |
| KT33B_HUMAN | 260  | 47325  | 1  |
| KRT36_HUMAN | 101  | 53354  | 1  |
| KT33A_HUMAN | 285  | 47166  | 1  |
| KRT35_HUMAN | 219  | 51640  | 1  |
| K1H2_HUMAN  | 194  | 51793  | 1  |
| K1C40_HUMAN | 83   | 50046  | 1  |
| SRP72_HUMAN | 313  | 75130  | 9  |



|             |     |        |    |
|-------------|-----|--------|----|
| RBM39_HUMAN | 298 | 59628  | 5  |
| TBB6_HUMAN  | 188 | 50281  | 4  |
| TBB8_HUMAN  | 182 | 50257  | 1  |
| RFA1_HUMAN  | 286 | 68723  | 10 |
| DNM1L_HUMAN | 278 | 82339  | 8  |
| SYK_HUMAN   | 277 | 68461  | 11 |
| ADAS_HUMAN  | 274 | 73664  | 7  |
| NUP85_HUMAN | 262 | 75826  | 7  |
| RBP56_HUMAN | 251 | 62021  | 3  |
| PDIA4_HUMAN | 247 | 73229  | 8  |
| ZN326_HUMAN | 216 | 65955  | 4  |
| SRP68_HUMAN | 215 | 71199  | 6  |
| SYG_HUMAN   | 209 | 83854  | 5  |
| LRRK1_HUMAN | 28  | 228385 | 1  |
| TBC15_HUMAN | 208 | 80352  | 6  |
| GUAA_HUMAN  | 205 | 77408  | 6  |
| KIF22_HUMAN | 186 | 73616  | 5  |
| RAVR1_HUMAN | 186 | 64464  | 3  |
| FXR1_HUMAN  | 183 | 70020  | 5  |
| ODP2_HUMAN  | 181 | 69466  | 1  |
| AMPB_HUMAN  | 178 | 73234  | 7  |
| ELMO2_HUMAN | 172 | 83018  | 7  |
| ELMO1_HUMAN | 118 | 84517  | 5  |
| ABCF3_HUMAN | 172 | 80094  | 5  |
| TRI25_HUMAN | 170 | 72581  | 6  |
| ARAF_HUMAN  | 166 | 68341  | 1  |
| RAF1_HUMAN  | 89  | 73803  | 2  |
| BRAF_HUMAN  | 84  | 85125  | 1  |
| NDUS1_HUMAN | 166 | 80443  | 8  |
| FBX46_HUMAN | 163 | 65731  | 6  |
| CPSF6_HUMAN | 163 | 59344  | 5  |
| E2AK2_HUMAN | 159 | 62512  | 4  |
| VATA_HUMAN  | 156 | 68660  | 3  |
| PARN_HUMAN  | 153 | 73918  | 4  |
| SUN2_HUMAN  | 145 | 80490  | 3  |
| GNL3L_HUMAN | 144 | 66216  | 7  |
| DDX41_HUMAN | 142 | 70477  | 5  |
| UTP18_HUMAN | 141 | 62421  | 2  |
| KRT85_HUMAN | 139 | 57306  | 1  |
| KRT82_HUMAN | 98  | 57985  | 1  |
| KRT81_HUMAN | 87  | 56832  | 1  |
| ASM3B_HUMAN | 138 | 51237  | 5  |
| KPCA_HUMAN  | 136 | 77841  | 3  |
| KPCB_HUMAN  | 100 | 77960  | 2  |
| AIFM1_HUMAN | 135 | 67144  | 1  |
| MTF2_HUMAN  | 133 | 68374  | 6  |
| LMNB2_HUMAN | 133 | 67762  | 5  |
| CENPB_HUMAN | 132 | 65531  | 3  |
| HNRPL_HUMAN | 129 | 64720  | 4  |
| DHX33_HUMAN | 129 | 79565  | 4  |
| CAN1_HUMAN  | 128 | 82465  | 7  |
| GFPT1_HUMAN | 127 | 79555  | 6  |
| SDHA_HUMAN  | 125 | 73672  | 2  |
| ANM5_HUMAN  | 124 | 73322  | 5  |
| NOP9_HUMAN  | 123 | 70136  | 4  |
| ABCF2_HUMAN | 119 | 71815  | 6  |
| RED_HUMAN   | 117 | 65676  | 4  |
| ABCD3_HUMAN | 114 | 75941  | 6  |
| SYFB_HUMAN  | 112 | 66701  | 1  |
| EIF3D_HUMAN | 108 | 64560  | 3  |
| SF01_HUMAN  | 107 | 68514  | 1  |
| PTCD3_HUMAN | 107 | 79184  | 3  |
| PLAK_HUMAN  | 105 | 82434  | 6  |
| POC5_HUMAN  | 104 | 63711  | 1  |
| TEC_HUMAN   | 102 | 74389  | 3  |
| PLST_HUMAN  | 102 | 71279  | 1  |

|             |     |        |   |
|-------------|-----|--------|---|
| PLSL_HUMAN  | 64  | 70814  | 1 |
| PLSI_HUMAN  | 41  | 70608  | 1 |
| COIL_HUMAN  | 102 | 63254  | 4 |
| ZWILC_HUMAN | 100 | 67685  | 1 |
| MBD4_HUMAN  | 96  | 66808  | 1 |
| DEFI6_HUMAN | 94  | 74435  | 2 |
| PPCE_HUMAN  | 91  | 81560  | 5 |
| SAS10_HUMAN | 88  | 54639  | 2 |
| EXOC5_HUMAN | 84  | 82827  | 2 |
| EXOC7_HUMAN | 82  | 83729  | 3 |
| DDX55_HUMAN | 82  | 69073  | 2 |
| SRPR_HUMAN  | 79  | 70223  | 1 |
| SAMH1_HUMAN | 79  | 72896  | 5 |
| LAP2A_HUMAN | 79  | 76016  | 3 |
| LAP2B_HUMAN | 24  | 50696  | 1 |
| DDX52_HUMAN | 79  | 67798  | 4 |
| PPR18_HUMAN | 78  | 68187  | 1 |
| MECP2_HUMAN | 77  | 52580  | 2 |
| SCFD2_HUMAN | 77  | 75877  | 4 |
| NO66_HUMAN  | 76  | 71384  | 3 |
| SENP3_HUMAN | 76  | 65596  | 1 |
| ZCCHV_HUMAN | 75  | 103135 | 4 |
| S27A2_HUMAN | 75  | 71066  | 3 |
| KEAP1_HUMAN | 73  | 71160  | 1 |
| APC5_HUMAN  | 71  | 85707  | 4 |
| ORC3_HUMAN  | 70  | 83285  | 2 |
| SHCBP_HUMAN | 69  | 76726  | 4 |
| ARHG8_HUMAN | 69  | 68154  | 1 |
| RPAP3_HUMAN | 68  | 75957  | 2 |
| MET13_HUMAN | 67  | 79573  | 3 |
| LARP7_HUMAN | 66  | 67143  | 2 |
| MERL_HUMAN  | 65  | 69874  | 1 |
| SHKB1_HUMAN | 64  | 76923  | 3 |
| LRC40_HUMAN | 64  | 68720  | 1 |
| MAGD2_HUMAN | 63  | 65085  | 1 |
| MAGD1_HUMAN | 24  | 86221  | 1 |
| MIRO1_HUMAN | 63  | 71765  | 1 |
| PAF1_HUMAN  | 61  | 60110  | 3 |
| ACS2L_HUMAN | 60  | 75664  | 2 |
| MEN1_HUMAN  | 59  | 68380  | 2 |
| FUBP1_HUMAN | 59  | 67690  | 4 |
| FUBP3_HUMAN | 27  | 61944  | 1 |
| PPM1G_HUMAN | 58  | 59919  | 1 |
| CBX2_HUMAN  | 58  | 56388  | 1 |
| VTNC_HUMAN  | 58  | 55069  | 1 |
| T2FA_HUMAN  | 58  | 58262  | 1 |
| PWP1_HUMAN  | 57  | 56363  | 3 |
| DESP_HUMAN  | 57  | 334021 | 1 |
| HABP2_HUMAN | 26  | 64740  | 1 |
| SCFD1_HUMAN | 56  | 72676  | 2 |
| ACPH_HUMAN  | 55  | 82142  | 3 |
| SNX1_HUMAN  | 55  | 59147  | 1 |
| STAT6_HUMAN | 55  | 94816  | 1 |
| NXF1_HUMAN  | 54  | 70652  | 1 |
| PGM2_HUMAN  | 53  | 68754  | 1 |
| CTBL1_HUMAN | 53  | 65588  | 1 |
| ANM3_HUMAN  | 44  | 60522  | 1 |
| LRC15_HUMAN | 52  | 65238  | 1 |
| XPP1_HUMAN  | 51  | 70558  | 1 |
| CRNL1_HUMAN | 51  | 100902 | 2 |
| NCDN_HUMAN  | 50  | 80239  | 1 |
| DAF_HUMAN   | 50  | 42400  | 2 |
| KIF2A_HUMAN | 50  | 80589  | 1 |
| SPA5L_HUMAN | 49  | 81515  | 3 |
| 2A5D_HUMAN  | 49  | 70289  | 1 |
| ZDH16_HUMAN | 48  | 44574  | 1 |

|             |    |        |   |
|-------------|----|--------|---|
| STK39_HUMAN | 48 | 59950  | 1 |
| GUF1_HUMAN  | 48 | 74737  | 1 |
| UBS3B_HUMAN | 48 | 73790  | 1 |
| FAKD5_HUMAN | 47 | 87488  | 1 |
| KR87P_HUMAN | 47 | 29555  | 1 |
| PTPRG_HUMAN | 46 | 163042 | 1 |
| ZN512_HUMAN | 46 | 65724  | 2 |
| PRC1_HUMAN  | 46 | 72246  | 1 |
| IF4A1_HUMAN | 45 | 46353  | 1 |
| ATD3A_HUMAN | 45 | 71610  | 1 |
| ABCD1_HUMAN | 45 | 83398  | 2 |
| HNRH1_HUMAN | 43 | 49484  | 1 |
| MFAP1_HUMAN | 43 | 51927  | 2 |
| SMCA2_HUMAN | 42 | 181794 | 1 |
| RBBP5_HUMAN | 41 | 59800  | 1 |
| CPSF3_HUMAN | 41 | 78120  | 1 |
| CHD7_HUMAN  | 41 | 337542 | 1 |
| CAF1B_HUMAN | 40 | 61910  | 1 |
| FAF1_HUMAN  | 40 | 74364  | 3 |
| TCPG_HUMAN  | 39 | 61066  | 2 |
| PGH1_HUMAN  | 39 | 69383  | 1 |
| CSTF3_HUMAN | 39 | 83325  | 2 |
| FACD2_HUMAN | 39 | 165792 | 1 |
| BRAT1_HUMAN | 39 | 89774  | 1 |
| SNX2_HUMAN  | 39 | 58549  | 1 |
| NADE_HUMAN  | 36 | 80545  | 1 |
| CBX4_HUMAN  | 36 | 61672  | 1 |
| LYRIC_HUMAN | 36 | 63856  | 1 |
| SNW1_HUMAN  | 35 | 61514  | 1 |
| PALM_HUMAN  | 35 | 42221  | 1 |
| ASML_HUMAN  | 34 | 69554  | 1 |
| VIP1_HUMAN  | 34 | 161245 | 1 |
| FIP1_HUMAN  | 34 | 66601  | 1 |
| UTP6_HUMAN  | 33 | 70776  | 1 |
| PRP17_HUMAN | 33 | 66164  | 1 |
| SBP1_HUMAN  | 33 | 52928  | 1 |
| HSPB1_HUMAN | 33 | 22826  | 1 |
| GLCNE_HUMAN | 33 | 80193  | 1 |
| DGLB_HUMAN  | 33 | 74882  | 2 |
| ASH2L_HUMAN | 33 | 69307  | 1 |
| ECHP_HUMAN  | 32 | 80072  | 1 |
| AP3B1_HUMAN | 32 | 121815 | 1 |
| TOM70_HUMAN | 32 | 68096  | 1 |
| NRBP_HUMAN  | 32 | 60377  | 1 |
| HCLS1_HUMAN | 31 | 54095  | 1 |
| ECHB_HUMAN  | 31 | 51547  | 1 |
| IRAK1_HUMAN | 31 | 77458  | 1 |
| SCML2_HUMAN | 30 | 78063  | 1 |
| SAMD1_HUMAN | 30 | 56189  | 1 |
| ATG7_HUMAN  | 30 | 79050  | 1 |
| THMS2_HUMAN | 30 | 72801  | 2 |
| ERCC2_HUMAN | 29 | 87652  | 1 |
| SWP70_HUMAN | 29 | 69354  | 1 |
| NPL4_HUMAN  | 28 | 69046  | 1 |
| WDR76_HUMAN | 28 | 70466  | 1 |
| CDCA2_HUMAN | 28 | 114146 | 1 |
| STIP1_HUMAN | 28 | 63227  | 1 |
| THOP1_HUMAN | 28 | 79702  | 2 |
| TAP1_HUMAN  | 27 | 87733  | 1 |
| RS4X_HUMAN  | 27 | 29807  | 1 |
| PDE12_HUMAN | 27 | 68221  | 1 |
| IQCB1_HUMAN | 27 | 69342  | 1 |
| FSIP2_HUMAN | 27 | 785878 | 1 |
| ERG7_HUMAN  | 27 | 84453  | 2 |
| SEPT9_HUMAN | 26 | 65646  | 2 |
| P66A_HUMAN  | 26 | 68363  | 1 |

|              |      |        |    |
|--------------|------|--------|----|
| TNIP1_HUMAN  | 26   | 72105  | 1  |
| SCRIB1_HUMAN | 26   | 61636  | 1  |
| ERLEC_HUMAN  | 25   | 55679  | 1  |
| ASZ1_HUMAN   | 25   | 53938  | 1  |
| DSG4_HUMAN   | 24   | 115462 | 1  |
| MCE1_HUMAN   | 24   | 69425  | 1  |
| UBQL2_HUMAN  | 24   | 65655  | 1  |
| VGLU3_HUMAN  | 24   | 65861  | 1  |
| SATB1_HUMAN  | 24   | 86246  | 2  |
| SATB2_HUMAN  | 24   | 83017  | 1  |
| WDR26_HUMAN  | 24   | 73048  | 1  |
| FHOD1_HUMAN  | 22   | 127328 | 1  |
| DDX4_HUMAN   | 22   | 80113  | 1  |
| PDIP2_HUMAN  | 22   | 42235  | 1  |
| HAUS3_HUMAN  | 21   | 70006  | 1  |
| ZSWM5_HUMAN  | 21   | 132318 | 1  |
| KHDR1_HUMAN  | 21   | 48311  | 1  |
| SYTM_HUMAN   | 21   | 81841  | 1  |
| CSMD3_HUMAN  | 20   | 414007 | 1  |
| THOC5_HUMAN  | 20   | 79199  | 1  |
| PLCH2_HUMAN  | 20   | 155940 | 1  |
| MDHM_HUMAN   | 20   | 35937  | 1  |
| DC1I2_HUMAN  | 20   | 71811  | 1  |
| TIRAP_HUMAN  | 19   | 24267  | 1  |
| SRRM2_HUMAN  | 19   | 300179 | 1  |
| KBP_HUMAN    | 19   | 72453  | 1  |
| ABCE1_HUMAN  | 19   | 68240  | 1  |
| GTPB2_HUMAN  | 19   | 66468  | 1  |
| DSG1_HUMAN   | 19   | 114702 | 1  |
| GALT1_HUMAN  | 19   | 65090  | 1  |
| PXK_HUMAN    | 19   | 65479  | 1  |
| LKHA4_HUMAN  | 18   | 69868  | 1  |
| TAF6L_HUMAN  | 18   | 68342  | 1  |
| PIEZ2_HUMAN  | 18   | 320652 | 1  |
| WASF2_HUMAN  | 18   | 54478  | 1  |
| HEAT3_HUMAN  | 17   | 75789  | 1  |
| KLC1_HUMAN   | 17   | 65782  | 1  |
| CE170_HUMAN  | 17   | 175586 | 1  |
| SPDE1_HUMAN  | 17   | 41041  | 1  |
| ITAV_HUMAN   | 17   | 117048 | 1  |
| DHB4_HUMAN   | 17   | 80092  | 1  |
| KI26B_HUMAN  | 17   | 226481 | 1  |
| TAP2_HUMAN   | 16   | 76186  | 1  |
| SYLM_HUMAN   | 16   | 102823 | 1  |
| NCPR_HUMAN   | 16   | 77097  | 1  |
| NSMA_HUMAN   | 16   | 48128  | 1  |
| KIFC1_HUMAN  | 16   | 74272  | 1  |
| CENPI_HUMAN  | 16   | 87748  | 1  |
| PIDD1_HUMAN  | 15   | 100619 | 1  |
| CH60_HUMAN   | 2272 | 61187  | 23 |
| KPYR_HUMAN   | 96   | 62191  | 1  |
| TBA3E_HUMAN  | 728  | 50568  | 1  |
| TBAL3_HUMAN  | 92   | 50675  | 1  |
| TCPD_HUMAN   | 1233 | 58401  | 14 |
| TCPA_HUMAN   | 1229 | 60819  | 17 |
| TCPQ_HUMAN   | 1167 | 60153  | 17 |
| TCPE_HUMAN   | 822  | 60089  | 14 |
| P4HA1_HUMAN  | 821  | 61296  | 10 |
| TBB8L_HUMAN  | 356  | 50168  | 3  |
| TCPH_HUMAN   | 808  | 59842  | 12 |
| NOC4L_HUMAN  | 768  | 58830  | 15 |
| ATD3C_HUMAN  | 464  | 46635  | 6  |
| ATD3B_HUMAN  | 258  | 73098  | 6  |
| TCPZ_HUMAN   | 725  | 58444  | 12 |
| TCPW_HUMAN   | 198  | 58355  | 3  |
| CPNE2_HUMAN  | 656  | 61835  | 11 |

|             |     |       |    |
|-------------|-----|-------|----|
| CPNE3_HUMAN | 93  | 60947 | 1  |
| U2AF2_HUMAN | 630 | 53809 | 9  |
| G6PI_HUMAN  | 594 | 63335 | 8  |
| PUR9_HUMAN  | 585 | 65089 | 16 |
| EIF3L_HUMAN | 534 | 66912 | 12 |
| IMA1_HUMAN  | 508 | 58168 | 9  |
| IMA8_HUMAN  | 35  | 57529 | 1  |
| SYNC_HUMAN  | 490 | 63758 | 12 |
| NP1L1_HUMAN | 488 | 45631 | 1  |
| KCC2G_HUMAN | 479 | 63311 | 7  |
| KCC2B_HUMAN | 177 | 73544 | 1  |
| KCC2A_HUMAN | 108 | 54624 | 1  |
| UTP15_HUMAN | 477 | 58721 | 7  |
| AP2S1_HUMAN | 77  | 17178 | 1  |
| SYFA_HUMAN  | 407 | 57585 | 6  |
| OXSR1_HUMAN | 401 | 58271 | 6  |
| TBL1R_HUMAN | 370 | 56187 | 8  |
| TBL1X_HUMAN | 71  | 63255 | 2  |
| TBL1Y_HUMAN | 26  | 57280 | 1  |
| COPD_HUMAN  | 367 | 57630 | 8  |
| FKBP4_HUMAN | 366 | 52057 | 9  |
| PSMD3_HUMAN | 351 | 61054 | 11 |
| ARP5_HUMAN  | 43  | 68825 | 1  |
| RTCB_HUMAN  | 339 | 55688 | 9  |
| RIC8A_HUMAN | 337 | 60185 | 10 |
| RIC8B_HUMAN | 28  | 59586 | 1  |
| CGAS_HUMAN  | 328 | 59462 | 9  |
| PDIA3_HUMAN | 323 | 57146 | 8  |
| CALR_HUMAN  | 321 | 48283 | 5  |
| IMA7_HUMAN  | 317 | 60733 | 6  |
| IMA5_HUMAN  | 260 | 60925 | 7  |
| IMA6_HUMAN  | 235 | 61052 | 4  |
| EHD1_HUMAN  | 315 | 60646 | 10 |
| EHD4_HUMAN  | 80  | 61365 | 5  |
| EHD3_HUMAN  | 64  | 60906 | 3  |
| NCLN_HUMAN  | 314 | 63106 | 10 |
| LRRF2_HUMAN | 309 | 82349 | 5  |
| SF3A3_HUMAN | 307 | 59154 | 5  |
| MAOM_HUMAN  | 299 | 66029 | 9  |
| SYYC_HUMAN  | 291 | 59448 | 8  |
| SNUT2_HUMAN | 281 | 65739 | 11 |
| 2AAA_HUMAN  | 274 | 66065 | 9  |
| 2AAB_HUMAN  | 149 | 66799 | 7  |
| PRS4_HUMAN  | 259 | 49325 | 1  |
| PRS8_HUMAN  | 43  | 45768 | 1  |
| NONO_HUMAN  | 248 | 54311 | 5  |
| RCC2_HUMAN  | 244 | 56790 | 8  |
| IMA4_HUMAN  | 237 | 58288 | 7  |
| IMA3_HUMAN  | 101 | 58364 | 3  |
| AAAS_HUMAN  | 237 | 60392 | 9  |
| UBP14_HUMAN | 237 | 56489 | 4  |
| PTBP1_HUMAN | 236 | 57357 | 8  |
| PTBP2_HUMAN | 27  | 57569 | 1  |
| DDX28_HUMAN | 236 | 59773 | 7  |
| EI2BD_HUMAN | 230 | 58035 | 6  |
| NELFD_HUMAN | 210 | 66832 | 6  |
| LYN_HUMAN   | 206 | 58993 | 9  |
| YES_HUMAN   | 116 | 61276 | 6  |
| SRC_HUMAN   | 57  | 60310 | 3  |
| FYN_HUMAN   | 53  | 61237 | 2  |
| HCK_HUMAN   | 41  | 60075 | 1  |
| IMDH2_HUMAN | 206 | 56226 | 5  |
| IRAK3_HUMAN | 201 | 68864 | 8  |
| HDAC1_HUMAN | 199 | 55638 | 5  |
| HDAC2_HUMAN | 170 | 55899 | 4  |
| CCD86_HUMAN | 197 | 40325 | 4  |

|             |     |       |   |
|-------------|-----|-------|---|
| U3IP2_HUMAN | 197 | 52436 | 2 |
| GRWD1_HUMAN | 194 | 49787 | 7 |
| DC1L1_HUMAN | 190 | 56829 | 7 |
| G3BP1_HUMAN | 178 | 52189 | 7 |
| DD19A_HUMAN | 178 | 54397 | 3 |
| DJC11_HUMAN | 172 | 63524 | 6 |
| DDX56_HUMAN | 167 | 62007 | 6 |
| WDR1_HUMAN  | 165 | 66836 | 5 |
| CEP63_HUMAN | 160 | 81863 | 4 |
| GSCR2_HUMAN | 160 | 54470 | 4 |
| CLPX_HUMAN  | 158 | 69922 | 6 |
| PRP19_HUMAN | 157 | 55603 | 7 |
| CTSL2_HUMAN | 153 | 53137 | 5 |
| ACAD9_HUMAN | 152 | 69344 | 3 |
| SCOT1_HUMAN | 151 | 56578 | 6 |
| SCOT2_HUMAN | 19  | 56731 | 1 |
| RD23B_HUMAN | 151 | 43202 | 5 |
| API5_HUMAN  | 147 | 59310 | 5 |
| SERA_HUMAN  | 144 | 57356 | 5 |
| DNJC7_HUMAN | 143 | 57203 | 4 |
| NELFB_HUMAN | 143 | 66283 | 3 |
| NMT1_HUMAN  | 142 | 57112 | 4 |
| NMT2_HUMAN  | 70  | 57286 | 1 |
| EXOS9_HUMAN | 140 | 49545 | 3 |
| ILVBL_HUMAN | 138 | 68452 | 7 |
| COASY_HUMAN | 136 | 62632 | 4 |
| PARP2_HUMAN | 136 | 66734 | 4 |
| ADCK3_HUMAN | 133 | 72418 | 5 |
| ELP3_HUMAN  | 131 | 62789 | 5 |
| PUF60_HUMAN | 130 | 60009 | 7 |
| ETV6_HUMAN  | 130 | 53252 | 3 |
| SYSC_HUMAN  | 129 | 59253 | 4 |
| GDS1_HUMAN  | 125 | 67073 | 5 |
| SQSTM_HUMAN | 125 | 48455 | 1 |
| ATLA3_HUMAN | 124 | 60960 | 4 |
| ATLA2_HUMAN | 26  | 66814 | 1 |
| RU17_HUMAN  | 118 | 51583 | 3 |
| STAU1_HUMAN | 117 | 63428 | 7 |
| SSF1_HUMAN  | 116 | 53446 | 4 |
| SMRD2_HUMAN | 115 | 59112 | 5 |
| DLDH_HUMAN  | 115 | 54713 | 2 |
| VPS4B_HUMAN | 114 | 49443 | 3 |
| FIGL1_HUMAN | 86  | 74829 | 1 |
| SAC1_HUMAN  | 111 | 67437 | 5 |
| SDPR_HUMAN  | 110 | 47202 | 1 |
| CATA_HUMAN  | 110 | 59947 | 3 |
| RCOR1_HUMAN | 110 | 53110 | 1 |
| RCOR3_HUMAN | 47  | 55661 | 2 |
| DPYL2_HUMAN | 108 | 62711 | 5 |
| DPYL1_HUMAN | 36  | 62487 | 1 |
| FA98A_HUMAN | 107 | 55823 | 3 |
| PGM1_HUMAN  | 102 | 61696 | 3 |
| CEP57_HUMAN | 97  | 57396 | 2 |
| HNRH2_HUMAN | 59  | 49517 | 1 |
| DCTN4_HUMAN | 94  | 53216 | 4 |
| APC7_HUMAN  | 90  | 67440 | 2 |
| CPNE1_HUMAN | 89  | 59649 | 3 |
| GLMN_HUMAN  | 87  | 68906 | 3 |
| RRP8_HUMAN  | 85  | 51424 | 5 |
| IKZF1_HUMAN | 85  | 58632 | 2 |
| COR1B_HUMAN | 82  | 54885 | 1 |
| COR2A_HUMAN | 81  | 60239 | 3 |
| SF3A2_HUMAN | 77  | 49338 | 3 |
| EED_HUMAN   | 76  | 50907 | 1 |
| TCHP_HUMAN  | 76  | 61148 | 4 |
| CDC23_HUMAN | 76  | 69588 | 4 |

|             |    |        |   |
|-------------|----|--------|---|
| FAKD3_HUMAN | 74 | 76895  | 1 |
| AL4A1_HUMAN | 74 | 62137  | 1 |
| NUP62_HUMAN | 73 | 53394  | 1 |
| HSP7E_HUMAN | 73 | 55444  | 2 |
| ASNS_HUMAN  | 72 | 64899  | 3 |
| KHDR2_HUMAN | 21 | 38904  | 1 |
| PNKP_HUMAN  | 71 | 57554  | 2 |
| K1C19_HUMAN | 64 | 44079  | 2 |
| NP1L4_HUMAN | 68 | 42968  | 1 |
| YBOX3_HUMAN | 68 | 40066  | 1 |
| CAP1_HUMAN  | 67 | 52325  | 1 |
| TCPB_HUMAN  | 66 | 57794  | 2 |
| STK4_HUMAN  | 66 | 55823  | 3 |
| RO60_HUMAN  | 66 | 61372  | 4 |
| ERO1A_HUMAN | 65 | 55213  | 2 |
| PAPD1_HUMAN | 65 | 66985  | 3 |
| PRP4_HUMAN  | 62 | 59097  | 4 |
| PPP5_HUMAN  | 61 | 57412  | 3 |
| BGAL_HUMAN  | 61 | 76483  | 1 |
| UAP1L_HUMAN | 60 | 57565  | 1 |
| AAPK1_HUMAN | 59 | 64596  | 5 |
| AAPK2_HUMAN | 23 | 62850  | 1 |
| CPSF7_HUMAN | 57 | 52189  | 3 |
| REN3B_HUMAN | 57 | 57841  | 3 |
| NCOA5_HUMAN | 57 | 65725  | 1 |
| MATK_HUMAN  | 56 | 57003  | 4 |
| NASP_HUMAN  | 55 | 85471  | 1 |
| LMAN1_HUMAN | 55 | 57798  | 1 |
| PAK1_HUMAN  | 41 | 60894  | 1 |
| MPP6_HUMAN  | 54 | 61364  | 3 |
| GPTC4_HUMAN | 53 | 50579  | 1 |
| ELF1_HUMAN  | 53 | 67684  | 2 |
| MA2B1_HUMAN | 53 | 114357 | 2 |
| ARMC8_HUMAN | 52 | 76601  | 1 |
| STXB3_HUMAN | 50 | 68633  | 1 |
| TRI26_HUMAN | 50 | 62925  | 2 |
| ARFG2_HUMAN | 49 | 57027  | 1 |
| MUS81_HUMAN | 49 | 61705  | 2 |
| TBCE_HUMAN  | 48 | 59936  | 1 |
| TYY1_HUMAN  | 48 | 45141  | 1 |
| STK38_HUMAN | 48 | 54498  | 1 |
| DHAK_HUMAN  | 48 | 59252  | 4 |
| GRP2_HUMAN  | 46 | 70060  | 2 |
| PRP31_HUMAN | 45 | 55649  | 1 |
| PCYXL_HUMAN | 45 | 54783  | 1 |
| KLHL6_HUMAN | 45 | 71340  | 1 |
| ARI1_HUMAN  | 44 | 65900  | 1 |
| SETD3_HUMAN | 44 | 67557  | 1 |
| INO1_HUMAN  | 44 | 61542  | 1 |
| INT11_HUMAN | 43 | 68360  | 2 |
| TMX3_HUMAN  | 43 | 52181  | 1 |
| SAAL1_HUMAN | 43 | 54436  | 1 |
| GLYR1_HUMAN | 43 | 61088  | 2 |
| SUH_HUMAN   | 43 | 56343  | 2 |
| ULA1_HUMAN  | 42 | 60665  | 2 |
| DEK_HUMAN   | 42 | 42933  | 4 |
| WDR37_HUMAN | 41 | 55316  | 2 |
| TOE1_HUMAN  | 39 | 57367  | 3 |
| KDEL2_HUMAN | 38 | 58934  | 1 |
| ZC3HF_HUMAN | 38 | 48972  | 1 |
| PTN6_HUMAN  | 38 | 67918  | 2 |
| EDC3_HUMAN  | 38 | 56784  | 3 |
| QRIC1_HUMAN | 37 | 86838  | 1 |
| ANT3_HUMAN  | 37 | 53025  | 1 |
| TBRG4_HUMAN | 36 | 71150  | 2 |
| CNOT6_HUMAN | 36 | 63723  | 2 |

|             |    |         |   |
|-------------|----|---------|---|
| TF3C1_HUMAN | 35 | 241062  | 1 |
| CSN1_HUMAN  | 35 | 56071   | 1 |
| RCC1_HUMAN  | 35 | 45397   | 1 |
| CNGB3_HUMAN | 34 | 92679   | 1 |
| WIPF1_HUMAN | 33 | 51284   | 1 |
| IRF5_HUMAN  | 33 | 56579   | 1 |
| GEM15_HUMAN | 33 | 170821  | 1 |
| KAPCB_HUMAN | 33 | 40711   | 1 |
| PSPC1_HUMAN | 32 | 58820   | 2 |
| MTMRE_HUMAN | 32 | 73013   | 1 |
| CCD47_HUMAN | 32 | 56123   | 2 |
| GAPD1_HUMAN | 32 | 166359  | 1 |
| CLPB_HUMAN  | 32 | 79193   | 1 |
| SNX27_HUMAN | 32 | 61854   | 1 |
| THUM3_HUMAN | 31 | 57765   | 1 |
| PUR1_HUMAN  | 31 | 58161   | 1 |
| SRRT_HUMAN  | 31 | 101060  | 1 |
| TRXR1_HUMAN | 31 | 71832   | 2 |
| VWA9_HUMAN  | 31 | 58004   | 1 |
| VP33A_HUMAN | 30 | 67967   | 1 |
| APOA_HUMAN  | 30 | 514737  | 1 |
| CENPU_HUMAN | 30 | 47721   | 1 |
| CNOT2_HUMAN | 30 | 59871   | 1 |
| PIGT_HUMAN  | 29 | 66228   | 1 |
| FBRL_HUMAN  | 29 | 33877   | 1 |
| CO6A1_HUMAN | 29 | 109602  | 1 |
| WASP_HUMAN  | 29 | 53108   | 1 |
| MOS_HUMAN   | 29 | 38366   | 1 |
| G3BP2_HUMAN | 29 | 54145   | 1 |
| TFCP2_HUMAN | 28 | 57676   | 1 |
| BANP_HUMAN  | 28 | 57143   | 2 |
| PRI2_HUMAN  | 27 | 59225   | 1 |
| CTR9_HUMAN  | 27 | 134332  | 1 |
| SYPL1_HUMAN | 27 | 28889   | 1 |
| ZN207_HUMAN | 27 | 51002   | 1 |
| PDCD4_HUMAN | 27 | 52102   | 1 |
| CARM1_HUMAN | 27 | 66382   | 1 |
| RL7A_HUMAN  | 26 | 30148   | 1 |
| CFA57_HUMAN | 26 | 145839  | 1 |
| PIGS_HUMAN  | 26 | 61731   | 1 |
| TF3C5_HUMAN | 26 | 59989   | 1 |
| EIF2A_HUMAN | 25 | 65519   | 2 |
| CDYL1_HUMAN | 24 | 66953   | 1 |
| CEP55_HUMAN | 24 | 54487   | 1 |
| PLRG1_HUMAN | 24 | 57500   | 1 |
| TITIN_HUMAN | 24 | 3842904 | 1 |
| CWC27_HUMAN | 23 | 53985   | 1 |
| ATPB_HUMAN  | 23 | 56525   | 1 |
| STT3A_HUMAN | 23 | 81104   | 1 |
| HACL1_HUMAN | 23 | 64429   | 1 |
| PATZ1_HUMAN | 22 | 75438   | 1 |
| LENG9_HUMAN | 22 | 53818   | 1 |
| AKA11_HUMAN | 21 | 212946  | 1 |
| CCDC6_HUMAN | 21 | 53429   | 1 |
| CD019_HUMAN | 21 | 34234   | 1 |
| FRIL_HUMAN  | 20 | 20064   | 1 |
| MTND_HUMAN  | 20 | 21542   | 1 |
| TF65_HUMAN  | 20 | 60695   | 1 |
| K2C78_HUMAN | 20 | 57629   | 1 |
| VILL_HUMAN  | 20 | 96418   | 1 |
| CDC73_HUMAN | 20 | 60653   | 1 |
| HMCS1_HUMAN | 20 | 57828   | 1 |
| GALT2_HUMAN | 19 | 65433   | 2 |
| RL7_HUMAN   | 19 | 29264   | 1 |
| SRFB1_HUMAN | 19 | 48718   | 1 |
| DPOD3_HUMAN | 18 | 51653   | 1 |



|             |     |        |   |
|-------------|-----|--------|---|
| CTDP1_HUMAN | 18  | 105304 | 1 |
| CO3A1_HUMAN | 18  | 139733 | 1 |
| PLK1_HUMAN  | 17  | 68953  | 1 |
| NUP54_HUMAN | 17  | 55515  | 1 |
| BAIP2_HUMAN | 17  | 61115  | 1 |
| RENT2_HUMAN | 17  | 148972 | 1 |
| UBQL1_HUMAN | 17  | 62479  | 1 |
| RSPRY_HUMAN | 17  | 65450  | 1 |
| DOK1_HUMAN  | 17  | 52815  | 1 |
| HNRPD_HUMAN | 17  | 38581  | 1 |
| TTLL4_HUMAN | 16  | 134606 | 1 |
| CE290_HUMAN | 16  | 290892 | 1 |
| RHGBA_HUMAN | 16  | 114879 | 1 |
| MPP8_HUMAN  | 16  | 97636  | 1 |
| TRI56_HUMAN | 16  | 83147  | 1 |
| BEND5_HUMAN | 16  | 48551  | 1 |
| PLMN_HUMAN  | 16  | 93247  | 1 |
| TM131_HUMAN | 15  | 205809 | 1 |
| CDC45_HUMAN | 15  | 66211  | 1 |
| PGK1_HUMAN  | 453 | 44985  | 2 |
| YBOX1_HUMAN | 274 | 35903  | 2 |
| YBOX2_HUMAN | 60  | 38552  | 1 |
| RUVB2_HUMAN | 271 | 51296  | 6 |
| IDHP_HUMAN  | 228 | 51333  | 3 |
| EBP2_HUMAN  | 200 | 34887  | 3 |
| RBMX_HUMAN  | 165 | 42306  | 2 |
| RMXL1_HUMAN | 152 | 42173  | 1 |
| RMXL2_HUMAN | 37  | 42959  | 1 |
| ENOA_HUMAN  | 163 | 47481  | 1 |
| SAHH_HUMAN  | 143 | 48255  | 2 |
| ARP3_HUMAN  | 141 | 47797  | 5 |
| ARP3B_HUMAN | 100 | 48090  | 2 |
| VRK1_HUMAN  | 122 | 45790  | 3 |
| DNJA1_HUMAN | 116 | 45581  | 1 |
| BZW1_HUMAN  | 114 | 48184  | 2 |
| BZW2_HUMAN  | 79  | 48360  | 1 |
| SYDC_HUMAN  | 108 | 57499  | 2 |
| ARP2_HUMAN  | 103 | 45017  | 3 |
| RBBP4_HUMAN | 99  | 47911  | 3 |
| RBBP7_HUMAN | 88  | 48132  | 2 |
| METK2_HUMAN | 97  | 43975  | 3 |
| METK1_HUMAN | 38  | 44190  | 1 |
| CG025_HUMAN | 95  | 46707  | 1 |
| QCR2_HUMAN  | 93  | 48584  | 2 |
| THIL_HUMAN  | 92  | 45456  | 2 |
| ODO2_HUMAN  | 91  | 49067  | 2 |
| UMPS_HUMAN  | 90  | 52645  | 1 |
| 6PGD_HUMAN  | 87  | 53619  | 1 |
| RRP15_HUMAN | 83  | 31636  | 2 |
| ILEU_HUMAN  | 83  | 42829  | 2 |
| Z355P_HUMAN | 78  | 51424  | 1 |
| MAK16_HUMAN | 75  | 35689  | 2 |
| EIF3F_HUMAN | 74  | 37654  | 2 |
| TMOD3_HUMAN | 71  | 39741  | 3 |
| TMOD1_HUMAN | 39  | 40658  | 1 |
| PUR6_HUMAN  | 67  | 47790  | 3 |
| STK26_HUMAN | 67  | 46785  | 2 |
| S10A8_HUMAN | 67  | 10885  | 1 |
| ILF2_HUMAN  | 66  | 43263  | 1 |
| PA2G4_HUMAN | 65  | 44101  | 2 |
| F10A1_HUMAN | 65  | 41477  | 1 |
| RTN4_HUMAN  | 64  | 130250 | 1 |
| GNAS1_HUMAN | 64  | 111697 | 2 |
| TBG1_HUMAN  | 64  | 51480  | 1 |
| OST48_HUMAN | 63  | 50940  | 2 |
| DHE3_HUMAN  | 61  | 61701  | 1 |

|             |     |        |   |
|-------------|-----|--------|---|
| DNJA2_HUMAN | 56  | 46344  | 1 |
| ROA2_HUMAN  | 54  | 37464  | 1 |
| IF2B_HUMAN  | 54  | 38706  | 1 |
| EFTU_HUMAN  | 53  | 49852  | 1 |
| EIF3E_HUMAN | 52  | 52587  | 1 |
| FLOT2_HUMAN | 52  | 47434  | 1 |
| GNAI2_HUMAN | 49  | 40995  | 1 |
| DDX49_HUMAN | 46  | 54819  | 1 |
| PSD11_HUMAN | 46  | 47719  | 2 |
| MRRP1_HUMAN | 44  | 47602  | 1 |
| CBX8_HUMAN  | 44  | 43483  | 1 |
| BYST_HUMAN  | 44  | 49798  | 1 |
| NAMPT_HUMAN | 40  | 55772  | 1 |
| CP51A_HUMAN | 40  | 57169  | 1 |
| GALK1_HUMAN | 39  | 42702  | 3 |
| IF4A3_HUMAN | 39  | 47126  | 1 |
| SCMC1_HUMAN | 39  | 53548  | 1 |
| PDIA6_HUMAN | 39  | 48490  | 1 |
| WDR12_HUMAN | 39  | 48191  | 1 |
| LYAR_HUMAN  | 39  | 44044  | 1 |
| TRI27_HUMAN | 38  | 59763  | 1 |
| KAP2_HUMAN  | 38  | 45832  | 1 |
| RL3_HUMAN   | 37  | 46365  | 1 |
| LA_HUMAN    | 36  | 46979  | 1 |
| NDUS2_HUMAN | 35  | 52911  | 1 |
| CLC11_HUMAN | 35  | 36015  | 1 |
| RPAC1_HUMAN | 35  | 39453  | 1 |
| SPTC1_HUMAN | 35  | 53281  | 1 |
| CI114_HUMAN | 34  | 42496  | 1 |
| AL1B1_HUMAN | 33  | 57626  | 1 |
| ERF1_HUMAN  | 33  | 49228  | 1 |
| KAPCA_HUMAN | 32  | 40678  | 1 |
| OLA1_HUMAN  | 31  | 44943  | 1 |
| PLEK_HUMAN  | 30  | 40499  | 1 |
| CTBP1_HUMAN | 29  | 47962  | 1 |
| FLOT1_HUMAN | 29  | 47554  | 2 |
| GALT8_HUMAN | 29  | 73432  | 1 |
| DAPK3_HUMAN | 28  | 52674  | 1 |
| VASP_HUMAN  | 28  | 39976  | 1 |
| EF1G_HUMAN  | 28  | 50429  | 1 |
| DDX47_HUMAN | 27  | 50900  | 1 |
| AMPL_HUMAN  | 26  | 56530  | 1 |
| AL7A1_HUMAN | 25  | 59020  | 1 |
| MKL1_HUMAN  | 25  | 99257  | 1 |
| MMTA2_HUMAN | 24  | 29679  | 1 |
| WDR55_HUMAN | 24  | 42557  | 1 |
| KRR1_HUMAN  | 24  | 43866  | 1 |
| MEP50_HUMAN | 23  | 37442  | 1 |
| ARI5B_HUMAN | 22  | 133433 | 1 |
| CO5_HUMAN   | 22  | 189897 | 1 |
| DCA13_HUMAN | 21  | 51996  | 1 |
| PSMD6_HUMAN | 21  | 45787  | 1 |
| GSK3B_HUMAN | 20  | 47228  | 1 |
| F111A_HUMAN | 20  | 71007  | 1 |
| SAMD5_HUMAN | 20  | 19390  | 1 |
| DPTOR_HUMAN | 18  | 46777  | 1 |
| PRS7_HUMAN  | 18  | 49002  | 1 |
| RBM34_HUMAN | 18  | 48649  | 1 |
| DAZP1_HUMAN | 17  | 43584  | 1 |
| TRUA_HUMAN  | 16  | 48010  | 1 |
| NUD14_HUMAN | 16  | 24331  | 1 |
| CQ080_HUMAN | 16  | 68356  | 1 |
| MB211_HUMAN | 22  | 41671  | 1 |
| PP1A_HUMAN  | 965 | 38229  | 9 |
| PP1G_HUMAN  | 807 | 37701  | 8 |
| PP1B_HUMAN  | 780 | 37961  | 7 |

|             |     |        |    |
|-------------|-----|--------|----|
| GNAI3_HUMAN | 377 | 41076  | 4  |
| GNA13_HUMAN | 75  | 44364  | 2  |
| GNAI1_HUMAN | 292 | 40905  | 2  |
| GNA12_HUMAN | 68  | 44422  | 1  |
| FBLL1_HUMAN | 415 | 34711  | 2  |
| G3P_HUMAN   | 792 | 36201  | 8  |
| RLA0_HUMAN  | 697 | 34423  | 6  |
| RLA0L_HUMAN | 388 | 34514  | 3  |
| ROA3_HUMAN  | 621 | 39799  | 7  |
| MK67I_HUMAN | 507 | 34372  | 9  |
| EF1D_HUMAN  | 425 | 31217  | 6  |
| EIF3I_HUMAN | 372 | 36878  | 6  |
| LDHB_HUMAN  | 362 | 36900  | 5  |
| SERC_HUMAN  | 320 | 40796  | 8  |
| PHB2_HUMAN  | 319 | 33276  | 6  |
| ARC1B_HUMAN | 306 | 41722  | 5  |
| RFC5_HUMAN  | 305 | 38757  | 10 |
| NACAM_HUMAN | 283 | 205979 | 4  |
| NACP1_HUMAN | 33  | 23292  | 1  |
| CAZA1_HUMAN | 267 | 33073  | 7  |
| CAZA2_HUMAN | 157 | 33157  | 4  |
| CDK6_HUMAN  | 266 | 37257  | 5  |
| DCAF7_HUMAN | 237 | 39528  | 2  |
| RFC4_HUMAN  | 237 | 40170  | 4  |
| CENPV_HUMAN | 226 | 30383  | 4  |
| RCL1_HUMAN  | 221 | 41273  | 6  |
| HNRDL_HUMAN | 216 | 46580  | 6  |
| RALY_HUMAN  | 213 | 32501  | 2  |
| RALYL_HUMAN | 115 | 32425  | 1  |
| LDHA_HUMAN  | 207 | 36950  | 6  |
| TEAD1_HUMAN | 25  | 48314  | 1  |
| NGDN_HUMAN  | 205 | 35872  | 2  |
| HNRH3_HUMAN | 201 | 36960  | 2  |
| PSD13_HUMAN | 198 | 43203  | 7  |
| VDAC1_HUMAN | 195 | 30868  | 5  |
| VDAC3_HUMAN | 74  | 30981  | 1  |
| ROAA_HUMAN  | 194 | 36316  | 5  |
| PCBP2_HUMAN | 193 | 38955  | 4  |
| PCBP3_HUMAN | 186 | 39725  | 3  |
| PCBP1_HUMAN | 183 | 37987  | 4  |
| RL5_HUMAN   | 186 | 34569  | 5  |
| TRA2B_HUMAN | 181 | 33760  | 2  |
| LEG9_HUMAN  | 179 | 39835  | 3  |
| LEG9B_HUMAN | 111 | 39977  | 2  |
| ABT1_HUMAN  | 177 | 31117  | 5  |
| BACH_HUMAN  | 171 | 42454  | 5  |
| VDAC2_HUMAN | 165 | 32060  | 4  |
| CDCA5_HUMAN | 164 | 27755  | 3  |
| PRPS2_HUMAN | 163 | 35146  | 4  |
| PRPS1_HUMAN | 146 | 35325  | 3  |
| PRPS3_HUMAN | 100 | 35387  | 2  |
| RBM4_HUMAN  | 158 | 40688  | 2  |
| RBM4B_HUMAN | 67  | 40466  | 2  |
| RRP7A_HUMAN | 156 | 32485  | 4  |
| ODPB_HUMAN  | 153 | 39550  | 5  |
| AIMP1_HUMAN | 151 | 34616  | 3  |
| CCNY_HUMAN  | 149 | 39825  | 5  |
| CCYL1_HUMAN | 61  | 41250  | 1  |
| IF2A_HUMAN  | 147 | 36374  | 4  |
| ALDOA_HUMAN | 144 | 39851  | 2  |
| IMP4_HUMAN  | 144 | 33850  | 3  |
| AURKB_HUMAN | 137 | 39571  | 5  |
| DNJB1_HUMAN | 137 | 38191  | 5  |
| DNJB4_HUMAN | 40  | 38011  | 1  |
| ENOB_HUMAN  | 43  | 47299  | 1  |
| IDH3A_HUMAN | 127 | 40022  | 3  |

|             |     |       |   |
|-------------|-----|-------|---|
| ADPPT_HUMAN | 123 | 35981 | 4 |
| SNR40_HUMAN | 123 | 39742 | 6 |
| RPF2_HUMAN  | 122 | 35731 | 4 |
| AATM_HUMAN  | 119 | 47886 | 3 |
| STING_HUMAN | 118 | 42736 | 2 |
| PSMD7_HUMAN | 118 | 37060 | 3 |
| TRA2A_HUMAN | 118 | 32726 | 2 |
| GNAQ_HUMAN  | 112 | 42400 | 3 |
| GNA11_HUMAN | 103 | 42382 | 2 |
| DIM1_HUMAN  | 111 | 35499 | 5 |
| ROA0_HUMAN  | 111 | 30993 | 4 |
| AIMP2_HUMAN | 109 | 35668 | 3 |
| MTNA_HUMAN  | 107 | 39467 | 1 |
| AN32E_HUMAN | 105 | 30902 | 3 |
| SETLP_HUMAN | 104 | 34861 | 2 |
| RFC3_HUMAN  | 101 | 41328 | 4 |
| GBB1_HUMAN  | 100 | 38151 | 2 |
| GBB2_HUMAN  | 87  | 38048 | 1 |
| AAKG1_HUMAN | 97  | 37727 | 3 |
| AAKG2_HUMAN | 91  | 63198 | 1 |
| ADHX_HUMAN  | 94  | 40554 | 2 |
| PCID2_HUMAN | 94  | 46627 | 4 |
| AIP_HUMAN   | 94  | 38068 | 4 |
| SRSF5_HUMAN | 91  | 31359 | 2 |
| RNPS1_HUMAN | 90  | 34188 | 2 |
| CDK9_HUMAN  | 89  | 43149 | 3 |
| MDHC_HUMAN  | 85  | 36631 | 4 |
| OTUB1_HUMAN | 85  | 31492 | 3 |
| DHSO_HUMAN  | 82  | 38927 | 1 |
| NB5R3_HUMAN | 82  | 34441 | 1 |
| CA131_HUMAN | 78  | 32804 | 2 |
| TXNL1_HUMAN | 76  | 32630 | 1 |
| PARVG_HUMAN | 75  | 37576 | 2 |
| ANM1_HUMAN  | 73  | 42059 | 2 |
| AK1A1_HUMAN | 73  | 36892 | 3 |
| ALDR_HUMAN  | 37  | 36230 | 1 |
| MTDC_HUMAN  | 72  | 38042 | 3 |
| SGTA_HUMAN  | 72  | 34270 | 1 |
| NDUA9_HUMAN | 69  | 42654 | 2 |
| PP2AA_HUMAN | 69  | 36142 | 3 |
| U2AF1_HUMAN | 69  | 28368 | 1 |
| PSDE_HUMAN  | 68  | 34726 | 2 |
| PLCE_HUMAN  | 68  | 42387 | 1 |
| ACADS_HUMAN | 67  | 44611 | 1 |
| RING2_HUMAN | 66  | 38088 | 1 |
| APEX1_HUMAN | 65  | 35931 | 1 |
| PCNA_HUMAN  | 65  | 29092 | 3 |
| IPYR_HUMAN  | 64  | 33095 | 3 |
| IPYR2_HUMAN | 49  | 38409 | 1 |
| RT29_HUMAN  | 64  | 45880 | 3 |
| PGK2_HUMAN  | 59  | 45166 | 2 |
| ANXA2_HUMAN | 63  | 38808 | 4 |
| AXA2L_HUMAN | 60  | 38806 | 3 |
| FPPS_HUMAN  | 62  | 48758 | 3 |
| LC7L2_HUMAN | 61  | 46942 | 3 |
| SRS10_HUMAN | 61  | 31339 | 2 |
| SRS12_HUMAN | 49  | 30665 | 1 |
| ISY1_HUMAN  | 60  | 33029 | 1 |
| PR38A_HUMAN | 59  | 37681 | 1 |
| MO4L1_HUMAN | 59  | 41562 | 3 |
| MO4L2_HUMAN | 54  | 32345 | 1 |
| KCRB_HUMAN  | 58  | 42902 | 2 |
| THOC3_HUMAN | 57  | 39431 | 2 |
| ABC3G_HUMAN | 56  | 47233 | 1 |
| TALDO_HUMAN | 56  | 37688 | 1 |
| MK14_HUMAN  | 56  | 41495 | 2 |

|             |    |        |   |
|-------------|----|--------|---|
| MK08_HUMAN  | 52 | 48835  | 1 |
| MAT2B_HUMAN | 54 | 37870  | 1 |
| BRX1_HUMAN  | 52 | 41660  | 3 |
| ARK72_HUMAN | 52 | 40020  | 1 |
| GLRX3_HUMAN | 51 | 37693  | 2 |
| RFC2_HUMAN  | 50 | 39588  | 1 |
| UCHL5_HUMAN | 50 | 37868  | 2 |
| PINX1_HUMAN | 50 | 37183  | 1 |
| ARHG1_HUMAN | 50 | 103056 | 2 |
| RT22_HUMAN  | 49 | 41425  | 4 |
| EIF3M_HUMAN | 48 | 42932  | 2 |
| ODPA_HUMAN  | 48 | 43952  | 2 |
| TIM50_HUMAN | 47 | 39850  | 2 |
| STRAP_HUMAN | 47 | 38756  | 2 |
| SPI1_HUMAN  | 47 | 31177  | 2 |
| M4K4_HUMAN  | 45 | 142754 | 1 |
| MINK1_HUMAN | 42 | 150413 | 1 |
| NTH_HUMAN   | 45 | 34767  | 1 |
| NDK7_HUMAN  | 44 | 42920  | 1 |
| PP2BA_HUMAN | 43 | 59335  | 1 |
| SPSY_HUMAN  | 43 | 41698  | 1 |
| F10A5_HUMAN | 27 | 41579  | 1 |
| TWF2_HUMAN  | 43 | 39751  | 2 |
| PIHD1_HUMAN | 43 | 32513  | 1 |
| DJB11_HUMAN | 42 | 40774  | 1 |
| NUP37_HUMAN | 42 | 37140  | 2 |
| TFB1M_HUMAN | 42 | 39860  | 2 |
| PPID_HUMAN  | 40 | 41137  | 1 |
| RRP1_HUMAN  | 40 | 53035  | 1 |
| MAP11_HUMAN | 39 | 44100  | 2 |
| RPR1A_HUMAN | 38 | 35926  | 1 |
| RTCA_HUMAN  | 37 | 39825  | 1 |
| KC1A_HUMAN  | 37 | 39118  | 2 |
| RUSD3_HUMAN | 37 | 38779  | 1 |
| RL14_HUMAN  | 37 | 23531  | 1 |
| ESTD_HUMAN  | 36 | 31956  | 1 |
| TDIF1_HUMAN | 36 | 37275  | 1 |
| IDH3B_HUMAN | 35 | 42442  | 3 |
| DNJA3_HUMAN | 35 | 53083  | 1 |
| CDK7_HUMAN  | 34 | 39299  | 1 |
| VP26A_HUMAN | 34 | 38260  | 2 |
| CMS1_HUMAN  | 34 | 32149  | 1 |
| ZN761_HUMAN | 34 | 90627  | 1 |
| NALP3_HUMAN | 33 | 120662 | 1 |
| GRHPR_HUMAN | 32 | 36045  | 2 |
| SEC13_HUMAN | 32 | 36031  | 1 |
| BIEA_HUMAN  | 32 | 33692  | 1 |
| ADA23_HUMAN | 32 | 94433  | 1 |
| PDIP3_HUMAN | 31 | 46289  | 1 |
| RAE1L_HUMAN | 31 | 41569  | 1 |
| IGBP1_HUMAN | 31 | 39312  | 1 |
| KC1G1_HUMAN | 30 | 48937  | 1 |
| H1X_HUMAN   | 30 | 22474  | 1 |
| CSK22_HUMAN | 30 | 41358  | 1 |
| DCPS_HUMAN  | 30 | 38756  | 1 |
| PPP6_HUMAN  | 30 | 35806  | 1 |
| SUCA_HUMAN  | 29 | 36626  | 2 |
| SIAS_HUMAN  | 29 | 40738  | 1 |
| TSR1_HUMAN  | 29 | 92151  | 1 |
| WDR5_HUMAN  | 29 | 37136  | 2 |
| CRKL_HUMAN  | 28 | 33870  | 1 |
| STX17_HUMAN | 28 | 33611  | 1 |
| GIPC1_HUMAN | 28 | 36141  | 1 |
| ASNA_HUMAN  | 28 | 39224  | 2 |
| DYN3_HUMAN  | 27 | 98084  | 1 |
| RYR3_HUMAN  | 28 | 557790 | 1 |

|             |      |        |    |
|-------------|------|--------|----|
| NSDHL_HUMAN | 28   | 42159  | 2  |
| FEN1_HUMAN  | 27   | 42908  | 1  |
| RM04_HUMAN  | 27   | 34954  | 1  |
| GPD1L_HUMAN | 26   | 39021  | 1  |
| NUBP1_HUMAN | 26   | 35140  | 1  |
| KPRA_HUMAN  | 26   | 39654  | 2  |
| KPRB_HUMAN  | 16   | 41299  | 1  |
| SRSF8_HUMAN | 26   | 32382  | 1  |
| DNJC9_HUMAN | 26   | 30062  | 1  |
| ATPG_HUMAN  | 25   | 33032  | 1  |
| RS3_HUMAN   | 25   | 26842  | 1  |
| BUB3_HUMAN  | 25   | 37587  | 1  |
| DCD_HUMAN   | 25   | 11391  | 1  |
| GMDS_HUMAN  | 25   | 42265  | 1  |
| THIC_HUMAN  | 24   | 41838  | 1  |
| ELAV1_HUMAN | 24   | 36240  | 1  |
| HEM6_HUMAN  | 23   | 50918  | 1  |
| RIOK3_HUMAN | 23   | 59511  | 1  |
| 3MG_HUMAN   | 22   | 33247  | 1  |
| SPTN5_HUMAN | 22   | 419230 | 1  |
| HDGF_HUMAN  | 22   | 26886  | 1  |
| PDXK_HUMAN  | 21   | 35308  | 1  |
| PP6R1_HUMAN | 21   | 97291  | 1  |
| N2DL2_HUMAN | 21   | 27863  | 1  |
| ASAH1_HUMAN | 21   | 45087  | 1  |
| BST1_HUMAN  | 21   | 36328  | 1  |
| RM39_HUMAN  | 21   | 39200  | 1  |
| ACOD_HUMAN  | 21   | 41667  | 1  |
| HM13_HUMAN  | 20   | 41747  | 1  |
| PEX16_HUMAN | 20   | 38662  | 1  |
| THOC6_HUMAN | 20   | 38081  | 2  |
| TAP26_HUMAN | 20   | 28880  | 1  |
| LASP1_HUMAN | 20   | 30097  | 1  |
| FA92B_HUMAN | 20   | 35048  | 1  |
| I20L2_HUMAN | 20   | 39415  | 1  |
| RPB3_HUMAN  | 19   | 31764  | 1  |
| RL19_HUMAN  | 19   | 23565  | 1  |
| AT10B_HUMAN | 19   | 167679 | 1  |
| EI2BB_HUMAN | 19   | 39193  | 1  |
| RM44_HUMAN  | 18   | 37854  | 1  |
| IDH3G_HUMAN | 18   | 43166  | 1  |
| CD123_HUMAN | 18   | 39566  | 1  |
| PLIN4_HUMAN | 18   | 135204 | 1  |
| PCY1A_HUMAN | 18   | 42047  | 1  |
| B3GT6_HUMAN | 18   | 37513  | 1  |
| LYSC_HUMAN  | 17   | 16982  | 1  |
| ZADH2_HUMAN | 17   | 40457  | 1  |
| UFD1_HUMAN  | 17   | 34763  | 1  |
| DHCR7_HUMAN | 16   | 55195  | 1  |
| ANR26_HUMAN | 16   | 197400 | 1  |
| RL10L_HUMAN | 16   | 24959  | 1  |
| RT05_HUMAN  | 16   | 48489  | 1  |
| CD11A_HUMAN | 16   | 91534  | 1  |
| ADA2B_HUMAN | 15   | 50333  | 1  |
| TPM3_HUMAN  | 1112 | 32987  | 5  |
| TPM2_HUMAN  | 803  | 32945  | 3  |
| SRSF1_HUMAN | 1050 | 27842  | 7  |
| RS8_HUMAN   | 954  | 24475  | 6  |
| GBLP_HUMAN  | 735  | 35511  | 10 |
| RL10A_HUMAN | 658  | 24987  | 7  |
| ADT4_HUMAN  | 53   | 35285  | 1  |
| CDK1_HUMAN  | 486  | 34131  | 10 |
| RS6_HUMAN   | 481  | 28834  | 3  |
| MRT4_HUMAN  | 416  | 27657  | 6  |
| RAN_HUMAN   | 401  | 24579  | 5  |
| 1433E_HUMAN | 388  | 29326  | 5  |

|             |     |       |   |
|-------------|-----|-------|---|
| 1433T_HUMAN | 310 | 28032 | 4 |
| 1433Z_HUMAN | 285 | 27899 | 4 |
| 1433B_HUMAN | 277 | 28179 | 2 |
| 1433F_HUMAN | 195 | 28372 | 2 |
| 1433G_HUMAN | 187 | 28456 | 1 |
| RS2_HUMAN   | 373 | 31590 | 5 |
| RSMB_HUMAN  | 359 | 24765 | 3 |
| RL7L_HUMAN  | 349 | 28757 | 7 |
| ARPC2_HUMAN | 349 | 34426 | 5 |
| DHB12_HUMAN | 342 | 34416 | 7 |
| ECH1_HUMAN  | 334 | 36136 | 1 |
| RS3A_HUMAN  | 325 | 30154 | 5 |
| RU2A_HUMAN  | 313 | 28512 | 5 |
| PHB_HUMAN   | 311 | 29843 | 7 |
| SRSF9_HUMAN | 307 | 25640 | 7 |
| CAPZB_HUMAN | 292 | 31616 | 5 |
| NEP1_HUMAN  | 289 | 26931 | 6 |
| PRDX6_HUMAN | 271 | 25133 | 7 |
| MPCP_HUMAN  | 250 | 40525 | 5 |
| TADBP_HUMAN | 249 | 45053 | 2 |
| IF6_HUMAN   | 243 | 27095 | 4 |
| H11_HUMAN   | 56  | 21829 | 1 |
| THOC4_HUMAN | 237 | 26872 | 3 |
| M2OM_HUMAN  | 236 | 34211 | 4 |
| RAB5C_HUMAN | 226 | 23696 | 3 |
| RAB5A_HUMAN | 141 | 23872 | 2 |
| NSA2_HUMAN  | 226 | 30218 | 6 |
| EF1B_HUMAN  | 220 | 24919 | 2 |
| PNO1_HUMAN  | 215 | 28078 | 3 |
| HCD2_HUMAN  | 214 | 27134 | 6 |
| UTP11_HUMAN | 213 | 30485 | 4 |
| GSTM3_HUMAN | 205 | 26998 | 5 |
| RSSA_HUMAN  | 200 | 32947 | 4 |
| PSA5_HUMAN  | 199 | 26565 | 3 |
| F207A_HUMAN | 197 | 25441 | 4 |
| SRSF7_HUMAN | 186 | 27578 | 2 |
| SRSF3_HUMAN | 130 | 19546 | 2 |
| PGAM1_HUMAN | 184 | 28900 | 4 |
| PGAM4_HUMAN | 47  | 28930 | 2 |
| PGAM2_HUMAN | 42  | 28919 | 1 |
| SPEE_HUMAN  | 182 | 34373 | 5 |
| BOREA_HUMAN | 182 | 31418 | 4 |
| TXTP_HUMAN  | 174 | 34333 | 6 |
| SRPRB_HUMAN | 168 | 29912 | 5 |
| PSA6_HUMAN  | 163 | 27838 | 3 |
| ETFB_HUMAN  | 157 | 28054 | 5 |
| RFA2_HUMAN  | 155 | 29342 | 4 |
| RU2B_HUMAN  | 154 | 25470 | 2 |
| SNRPA_HUMAN | 86  | 31259 | 1 |
| CAH2_HUMAN  | 151 | 29285 | 4 |
| GDIR1_HUMAN | 150 | 23250 | 2 |
| K1C16_HUMAN | 138 | 51578 | 1 |
| PSA7_HUMAN  | 150 | 28041 | 3 |
| PSA7L_HUMAN | 96  | 28683 | 1 |
| SRSF2_HUMAN | 147 | 25461 | 1 |
| PNPH_HUMAN  | 143 | 32325 | 5 |
| DPM1_HUMAN  | 142 | 29673 | 4 |
| GAR1_HUMAN  | 139 | 22505 | 3 |
| HMGB2_HUMAN | 136 | 24190 | 2 |
| HMGB1_HUMAN | 121 | 25049 | 2 |
| HGB1A_HUMAN | 92  | 24394 | 1 |
| HMGB3_HUMAN | 53  | 23137 | 1 |
| CPSF5_HUMAN | 133 | 26268 | 4 |
| RL10_HUMAN  | 127 | 25044 | 2 |
| DHB11_HUMAN | 123 | 33257 | 4 |
| WDR61_HUMAN | 122 | 33731 | 2 |

|             |     |        |   |
|-------------|-----|--------|---|
| GDIR2_HUMAN | 120 | 23031  | 3 |
| GHC1_HUMAN  | 119 | 34904  | 3 |
| GHC2_HUMAN  | 95  | 34340  | 2 |
| PSA3_HUMAN  | 118 | 28643  | 2 |
| SARNP_HUMAN | 117 | 23713  | 3 |
| PSA4_HUMAN  | 109 | 29750  | 2 |
| IF4H_HUMAN  | 108 | 27425  | 1 |
| HPRT_HUMAN  | 108 | 24792  | 1 |
| DNJB6_HUMAN | 107 | 36122  | 2 |
| DNJB3_HUMAN | 66  | 16719  | 1 |
| ENOPH_HUMAN | 106 | 29086  | 1 |
| PA1B3_HUMAN | 105 | 25832  | 1 |
| RPP30_HUMAN | 104 | 29702  | 4 |
| RANG_HUMAN  | 103 | 23467  | 1 |
| TPIS_HUMAN  | 103 | 31057  | 5 |
| ERP29_HUMAN | 99  | 29032  | 2 |
| C1QBP_HUMAN | 97  | 31742  | 3 |
| CYBP_HUMAN  | 95  | 26308  | 4 |
| NUDT5_HUMAN | 95  | 24597  | 4 |
| ANXA5_HUMAN | 93  | 35971  | 2 |
| DIC_HUMAN   | 93  | 31718  | 2 |
| BDH_HUMAN   | 92  | 38532  | 4 |
| AN32B_HUMAN | 91  | 28941  | 3 |
| AN32A_HUMAN | 63  | 28682  | 2 |
| AN32C_HUMAN | 30  | 26917  | 1 |
| GSTO1_HUMAN | 91  | 27833  | 3 |
| MYL6B_HUMAN | 87  | 22864  | 1 |
| RAB14_HUMAN | 86  | 24110  | 4 |
| RAB6A_HUMAN | 56  | 23692  | 2 |
| RAB10_HUMAN | 56  | 22755  | 1 |
| SNP23_HUMAN | 86  | 23682  | 2 |
| SPC24_HUMAN | 85  | 22521  | 1 |
| PSMD8_HUMAN | 82  | 39872  | 2 |
| RAB34_HUMAN | 82  | 29482  | 3 |
| LRC59_HUMAN | 81  | 35308  | 1 |
| DCK_HUMAN   | 80  | 30841  | 2 |
| RRP36_HUMAN | 78  | 29862  | 2 |
| CENPP_HUMAN | 77  | 33429  | 2 |
| SC22B_HUMAN | 77  | 24806  | 1 |
| PSA1_HUMAN  | 77  | 29822  | 2 |
| CLIC4_HUMAN | 76  | 28982  | 3 |
| RL24_HUMAN  | 74  | 17882  | 2 |
| FRG1_HUMAN  | 74  | 29439  | 2 |
| PA1B2_HUMAN | 74  | 25724  | 2 |
| ETFA_HUMAN  | 74  | 35400  | 5 |
| NUBP2_HUMAN | 73  | 29206  | 2 |
| CSK2B_HUMAN | 70  | 25268  | 1 |
| ZNF22_HUMAN | 69  | 26583  | 1 |
| MLEC_HUMAN  | 69  | 32385  | 1 |
| EXOS2_HUMAN | 69  | 32996  | 2 |
| COMT_HUMAN  | 67  | 30474  | 2 |
| CY1_HUMAN   | 67  | 35741  | 1 |
| CC124_HUMAN | 66  | 25820  | 1 |
| PSME1_HUMAN | 66  | 28876  | 3 |
| TMA16_HUMAN | 66  | 24078  | 1 |
| GRB2_HUMAN  | 63  | 25304  | 2 |
| PSME3_HUMAN | 63  | 29602  | 2 |
| GNL1_HUMAN  | 63  | 69132  | 1 |
| ECE2_HUMAN  | 62  | 100509 | 1 |
| RT34_HUMAN  | 62  | 25692  | 1 |
| RB11A_HUMAN | 61  | 24492  | 1 |
| PDC10_HUMAN | 59  | 24686  | 2 |
| ID11_HUMAN  | 58  | 26645  | 2 |
| RT02_HUMAN  | 58  | 33513  | 1 |
| KITH_HUMAN  | 58  | 26079  | 1 |
| AKIP1_HUMAN | 57  | 23328  | 1 |



|             |    |        |   |
|-------------|----|--------|---|
| DCXR_HUMAN  | 56 | 26182  | 1 |
| MEMO1_HUMAN | 56 | 34111  | 2 |
| EXOS6_HUMAN | 55 | 28503  | 2 |
| RNH2A_HUMAN | 55 | 33716  | 1 |
| EXOS4_HUMAN | 55 | 26652  | 2 |
| RPAB1_HUMAN | 54 | 24650  | 2 |
| FBSP1_HUMAN | 53 | 31183  | 1 |
| MTCH2_HUMAN | 52 | 33936  | 1 |
| FA49B_HUMAN | 51 | 37010  | 1 |
| RCD1_HUMAN  | 50 | 33952  | 1 |
| PGAM5_HUMAN | 49 | 32213  | 2 |
| NOL7_HUMAN  | 48 | 29466  | 1 |
| CDK2_HUMAN  | 48 | 34079  | 1 |
| CN166_HUMAN | 48 | 28165  | 3 |
| SPF30_HUMAN | 48 | 26866  | 1 |
| FAH2A_HUMAN | 48 | 34916  | 1 |
| ML12A_HUMAN | 47 | 19839  | 1 |
| CLN6_HUMAN  | 46 | 36010  | 1 |
| GNPI1_HUMAN | 46 | 32819  | 3 |
| GNPI2_HUMAN | 18 | 31293  | 1 |
| NIT2_HUMAN  | 45 | 30988  | 4 |
| GSTM1_HUMAN | 45 | 25923  | 2 |
| GSTM5_HUMAN | 36 | 25829  | 1 |
| GSTM2_HUMAN | 30 | 25899  | 1 |
| RT07_HUMAN  | 45 | 28230  | 3 |
| VWA8_HUMAN  | 44 | 215716 | 1 |
| TFAM_HUMAN  | 44 | 29306  | 1 |
| TSN_HUMAN   | 44 | 26281  | 1 |
| BAG2_HUMAN  | 44 | 23928  | 1 |
| LSM12_HUMAN | 43 | 21972  | 1 |
| SPRE_HUMAN  | 43 | 28316  | 1 |
| NDUS3_HUMAN | 42 | 30337  | 2 |
| RB27A_HUMAN | 42 | 25137  | 1 |
| 6PGL_HUMAN  | 42 | 27815  | 3 |
| DECR2_HUMAN | 42 | 31100  | 2 |
| COPE_HUMAN  | 42 | 34688  | 2 |
| GET4_HUMAN  | 42 | 36709  | 1 |
| RPIA_HUMAN  | 42 | 33533  | 1 |
| GOLP3_HUMAN | 41 | 34075  | 1 |
| CASPG_HUMAN | 41 | 20447  | 1 |
| RS4Y1_HUMAN | 40 | 29665  | 1 |
| F186A_HUMAN | 40 | 262994 | 1 |
| PPIA_HUMAN  | 40 | 18229  | 1 |
| BCL2_HUMAN  | 39 | 26363  | 1 |
| LGUL_HUMAN  | 39 | 20992  | 1 |
| RM01_HUMAN  | 38 | 37113  | 2 |
| RM19_HUMAN  | 38 | 33799  | 2 |
| SUMF2_HUMAN | 38 | 33936  | 2 |
| DR4L1_HUMAN | 37 | 30816  | 1 |
| RSU1_HUMAN  | 37 | 31521  | 1 |
| SGMR1_HUMAN | 36 | 25169  | 1 |
| CMBL_HUMAN  | 36 | 28372  | 1 |
| SPF27_HUMAN | 36 | 26229  | 1 |
| CC71L_HUMAN | 36 | 26473  | 2 |
| PRKRA_HUMAN | 35 | 34839  | 2 |
| NUDT8_HUMAN | 35 | 25753  | 1 |
| KAD2_HUMAN  | 35 | 26689  | 1 |
| COQ5_HUMAN  | 35 | 37402  | 2 |
| RL22_HUMAN  | 34 | 14835  | 1 |
| PIMT_HUMAN  | 34 | 24792  | 1 |
| CC106_HUMAN | 34 | 32241  | 1 |
| DECR_HUMAN  | 33 | 36330  | 1 |
| RL27A_HUMAN | 32 | 16665  | 2 |
| GRIA3_HUMAN | 32 | 101662 | 1 |
| RM45_HUMAN  | 32 | 35613  | 1 |
| RL8_HUMAN   | 32 | 28235  | 1 |

|             |    |        |   |
|-------------|----|--------|---|
| RAD1_HUMAN  | 32 | 32434  | 1 |
| NIPS1_HUMAN | 31 | 33460  | 2 |
| ZCH10_HUMAN | 31 | 21125  | 1 |
| KANK2_HUMAN | 31 | 91916  | 1 |
| PPIE_HUMAN  | 31 | 33695  | 1 |
| LIMS1_HUMAN | 30 | 39108  | 1 |
| HAX1_HUMAN  | 30 | 31601  | 1 |
| SUGT1_HUMAN | 30 | 41284  | 1 |
| RL17_HUMAN  | 30 | 21611  | 1 |
| CF223_HUMAN | 30 | 26211  | 2 |
| NEK6_HUMAN  | 30 | 36261  | 1 |
| TPC_HUMAN   | 29 | 35887  | 2 |
| MCU_HUMAN   | 28 | 40127  | 1 |
| PSME2_HUMAN | 28 | 27555  | 1 |
| NC2A_HUMAN  | 28 | 22450  | 1 |
| WDR82_HUMAN | 28 | 35456  | 1 |
| DTD1_HUMAN  | 28 | 23580  | 1 |
| ZFY16_HUMAN | 27 | 171192 | 1 |
| ZMAT2_HUMAN | 27 | 23768  | 1 |
| PSMG1_HUMAN | 27 | 33631  | 1 |
| ECHD1_HUMAN | 27 | 33848  | 1 |
| CDK4_HUMAN  | 27 | 33936  | 1 |
| PSB1_HUMAN  | 27 | 26700  | 1 |
| TIPRL_HUMAN | 27 | 31652  | 1 |
| PBDC1_HUMAN | 27 | 26155  | 1 |
| MTHSD_HUMAN | 27 | 42488  | 1 |
| T2FB_HUMAN  | 26 | 28420  | 1 |
| RBM7_HUMAN  | 26 | 30485  | 2 |
| PROZ_HUMAN  | 26 | 46026  | 1 |
| NAA10_HUMAN | 25 | 26613  | 1 |
| GSTP1_HUMAN | 24 | 23569  | 1 |
| S28A3_HUMAN | 24 | 77678  | 1 |
| SSU72_HUMAN | 24 | 23016  | 1 |
| CS052_HUMAN | 24 | 29500  | 1 |
| UCK2_HUMAN  | 24 | 29452  | 1 |
| CENPQ_HUMAN | 24 | 30633  | 1 |
| ZCCHL_HUMAN | 24 | 33967  | 1 |
| ES1_HUMAN   | 24 | 28495  | 1 |
| TMX1_HUMAN  | 23 | 32170  | 2 |
| CP1B1_HUMAN | 21 | 61263  | 1 |
| SERPH_HUMAN | 23 | 46525  | 1 |
| 41_HUMAN    | 23 | 97528  | 1 |
| MRGBP_HUMAN | 23 | 22574  | 1 |
| MP2K1_HUMAN | 22 | 43753  | 1 |
| IFT46_HUMAN | 22 | 34436  | 1 |
| EGFL7_HUMAN | 22 | 30739  | 1 |
| SNAH_HUMAN  | 22 | 33667  | 1 |
| PRS10_HUMAN | 22 | 44430  | 1 |
| INT2_HUMAN  | 22 | 136118 | 1 |
| ARC_HUMAN   | 21 | 45573  | 1 |
| PCDG9_HUMAN | 21 | 102195 | 1 |
| AT2B1_HUMAN | 21 | 139637 | 1 |
| SFXN2_HUMAN | 21 | 36493  | 1 |
| FA60A_HUMAN | 21 | 25464  | 1 |
| NUMB_HUMAN  | 21 | 71444  | 1 |
| NMRL1_HUMAN | 21 | 33494  | 1 |
| GOSR1_HUMAN | 20 | 28709  | 1 |
| ITFG3_HUMAN | 20 | 60249  | 1 |
| WDR74_HUMAN | 20 | 42985  | 1 |
| CD022_HUMAN | 20 | 26853  | 1 |
| CASP9_HUMAN | 20 | 46993  | 1 |
| MCAT_HUMAN  | 20 | 33264  | 1 |
| SNP29_HUMAN | 20 | 28953  | 1 |
| MMAB_HUMAN  | 20 | 27713  | 1 |
| AKP13_HUMAN | 19 | 310381 | 1 |
| EI2BA_HUMAN | 19 | 33976  | 1 |

|             |     |        |   |
|-------------|-----|--------|---|
| TPD54_HUMAN | 19  | 22281  | 1 |
| RGPD1_HUMAN | 18  | 198022 | 1 |
| H2AV_HUMAN  | 18  | 13501  | 1 |
| SPD16_HUMAN | 18  | 37874  | 1 |
| H1BP3_HUMAN | 18  | 42868  | 1 |
| HCDH_HUMAN  | 17  | 34329  | 1 |
| PSA2_HUMAN  | 17  | 25996  | 1 |
| TAM41_HUMAN | 16  | 51946  | 1 |
| FCSD1_HUMAN | 16  | 77180  | 1 |
| KAD9_HUMAN  | 16  | 222698 | 1 |
| DYST_HUMAN  | 15  | 865259 | 1 |
| CB047_HUMAN | 15  | 32923  | 1 |
| MYL9_HUMAN  | 48  | 19871  | 1 |
| MYL1_HUMAN  | 99  | 21189  | 1 |
| H2A2B_HUMAN | 189 | 13987  | 1 |
| H90B4_HUMAN | 35  | 58855  | 1 |
| RL15_HUMAN  | 364 | 24245  | 1 |
| RL30_HUMAN  | 363 | 12947  | 2 |
| PROF1_HUMAN | 297 | 15216  | 3 |
| RL37A_HUMAN | 280 | 10497  | 1 |
| RL21_HUMAN  | 239 | 18610  | 1 |
| RS15A_HUMAN | 237 | 14944  | 2 |
| RLA2_HUMAN  | 224 | 11658  | 4 |
| H3C_HUMAN   | 207 | 15318  | 2 |
| MIF_HUMAN   | 206 | 12639  | 2 |
| RS16_HUMAN  | 202 | 16549  | 3 |
| RL38_HUMAN  | 194 | 8270   | 2 |
| PEBB_HUMAN  | 190 | 21723  | 1 |
| RS9_HUMAN   | 183 | 22635  | 3 |
| RS14_HUMAN  | 160 | 16434  | 2 |
| PRDX1_HUMAN | 143 | 22324  | 3 |
| PRDX2_HUMAN | 56  | 22049  | 1 |
| PRDX4_HUMAN | 42  | 30749  | 1 |
| APT_HUMAN   | 142 | 19766  | 2 |
| RL12_HUMAN  | 139 | 17979  | 1 |
| PPAC_HUMAN  | 137 | 18487  | 3 |
| NH2L1_HUMAN | 133 | 14393  | 2 |
| ARP5L_HUMAN | 123 | 16931  | 2 |
| HINT1_HUMAN | 123 | 13907  | 1 |
| RL23A_HUMAN | 123 | 17684  | 1 |
| RL18A_HUMAN | 120 | 21034  | 1 |
| RL9_HUMAN   | 120 | 21964  | 1 |
| THIO_HUMAN  | 115 | 12015  | 1 |
| RS12_HUMAN  | 115 | 14905  | 3 |
| SMD1_HUMAN  | 111 | 13273  | 3 |
| ATPO_HUMAN  | 110 | 23377  | 1 |
| RS20_HUMAN  | 106 | 13478  | 1 |
| USMG5_HUMAN | 102 | 6510   | 1 |
| ARL1_HUMAN  | 102 | 20518  | 1 |
| TEBP_HUMAN  | 100 | 18971  | 1 |
| RS25_HUMAN  | 97  | 13791  | 2 |
| CBX3_HUMAN  | 95  | 20969  | 1 |
| RL27_HUMAN  | 94  | 15788  | 2 |
| R13P3_HUMAN | 92  | 12184  | 1 |
| ARF1_HUMAN  | 90  | 20741  | 2 |
| ARF4_HUMAN  | 83  | 20612  | 1 |
| RL23_HUMAN  | 89  | 14970  | 2 |
| CALM_HUMAN  | 84  | 16827  | 3 |
| ATP5L_HUMAN | 84  | 11421  | 1 |
| PDCD6_HUMAN | 83  | 21912  | 1 |
| RS13_HUMAN  | 83  | 17212  | 1 |
| EIF3K_HUMAN | 77  | 25329  | 1 |
| CIRBP_HUMAN | 75  | 18637  | 1 |
| ARL2_HUMAN  | 75  | 21036  | 1 |
| FABP5_HUMAN | 74  | 15497  | 1 |
| SAR1A_HUMAN | 72  | 22467  | 1 |

|             |    |        |   |
|-------------|----|--------|---|
| ABHEB_HUMAN | 71 | 22446  | 1 |
| RAB1A_HUMAN | 69 | 22891  | 1 |
| SELH_HUMAN  | 68 | 13503  | 1 |
| PRDX5_HUMAN | 64 | 22301  | 1 |
| RBM8A_HUMAN | 60 | 19934  | 1 |
| NUDC_HUMAN  | 60 | 38276  | 1 |
| RS19_HUMAN  | 59 | 16051  | 1 |
| HBA_HUMAN   | 53 | 15305  | 2 |
| ERH_HUMAN   | 51 | 12422  | 1 |
| SPT4H_HUMAN | 51 | 13470  | 1 |
| CGBP1_HUMAN | 50 | 19094  | 1 |
| UB2D2_HUMAN | 48 | 16953  | 1 |
| HMGA1_HUMAN | 45 | 11669  | 1 |
| RAB18_HUMAN | 45 | 23248  | 1 |
| KCY_HUMAN   | 45 | 22436  | 1 |
| TCP4_HUMAN  | 45 | 14386  | 2 |
| RS17L_HUMAN | 43 | 15597  | 1 |
| LLPH_HUMAN  | 42 | 15329  | 1 |
| T126A_HUMAN | 42 | 21742  | 1 |
| RAB7A_HUMAN | 42 | 23760  | 1 |
| SRP09_HUMAN | 41 | 10219  | 1 |
| ARPC4_HUMAN | 41 | 19768  | 1 |
| CCHL_HUMAN  | 41 | 30981  | 1 |
| GOGA7_HUMAN | 40 | 16042  | 1 |
| LEG7_HUMAN  | 39 | 15123  | 1 |
| RS18_HUMAN  | 38 | 17708  | 1 |
| RAP1B_HUMAN | 38 | 21040  | 1 |
| MIP18_HUMAN | 38 | 17766  | 1 |
| RAB2A_HUMAN | 38 | 23702  | 1 |
| LTOR1_HUMAN | 37 | 17848  | 1 |
| NDKB_HUMAN  | 36 | 17401  | 1 |
| TR112_HUMAN | 36 | 14304  | 1 |
| RASN_HUMAN  | 35 | 21501  | 1 |
| RS30_HUMAN  | 35 | 6644   | 1 |
| NHP2_HUMAN  | 34 | 17532  | 1 |
| UBE2N_HUMAN | 33 | 17184  | 1 |
| DUS23_HUMAN | 32 | 16806  | 1 |
| CYTB_HUMAN  | 32 | 11190  | 1 |
| RM22_HUMAN  | 32 | 23797  | 1 |
| RS24_HUMAN  | 31 | 15413  | 1 |
| TRAIP_HUMAN | 31 | 53945  | 1 |
| RLP24_HUMAN | 31 | 19893  | 1 |
| BIRC5_HUMAN | 30 | 16720  | 1 |
| PHF5A_HUMAN | 30 | 13138  | 1 |
| CQ10B_HUMAN | 30 | 27509  | 1 |
| CE042_HUMAN | 29 | 365280 | 1 |
| CBX1_HUMAN  | 29 | 21519  | 1 |
| DEST_HUMAN  | 29 | 18950  | 1 |
| CTBP2_HUMAN | 29 | 49427  | 1 |
| CX6B1_HUMAN | 28 | 10414  | 1 |
| PLB1_HUMAN  | 28 | 164859 | 1 |
| CD248_HUMAN | 28 | 82803  | 1 |
| COPZ1_HUMAN | 27 | 20242  | 1 |
| COF1_HUMAN  | 27 | 18719  | 1 |
| RS27L_HUMAN | 27 | 9813   | 1 |
| OR7C1_HUMAN | 26 | 36122  | 1 |
| PSD10_HUMAN | 25 | 24697  | 1 |
| SMIM4_HUMAN | 24 | 8691   | 1 |
| PPIB_HUMAN  | 23 | 23785  | 1 |
| RL32_HUMAN  | 23 | 15964  | 1 |
| TXND2_HUMAN | 23 | 60709  | 1 |
| IMP3_HUMAN  | 23 | 21951  | 1 |
| SMD3_HUMAN  | 23 | 14021  | 1 |
| TCAF1_HUMAN | 23 | 103144 | 1 |
| CH10_HUMAN  | 22 | 10925  | 1 |
| NOP16_HUMAN | 22 | 21232  | 1 |

|             |    |        |   |
|-------------|----|--------|---|
| FKB1A_HUMAN | 22 | 12000  | 1 |
| KLOTB_HUMAN | 21 | 120473 | 1 |
| FA65A_HUMAN | 21 | 133423 | 1 |
| PTPM1_HUMAN | 21 | 23000  | 1 |
| SNX12_HUMAN | 19 | 19889  | 1 |
| NDKA_HUMAN  | 19 | 17309  | 1 |
| TXD17_HUMAN | 19 | 14217  | 1 |
| MCEE_HUMAN  | 19 | 18851  | 1 |
| MYDGF_HUMAN | 18 | 18897  | 1 |
| ZEP3_HUMAN  | 18 | 261129 | 1 |
| UB2V1_HUMAN | 18 | 16598  | 1 |
| RAP2A_HUMAN | 18 | 20830  | 1 |
| RGF1A_HUMAN | 18 | 55148  | 1 |
| TMM97_HUMAN | 18 | 21005  | 1 |
| SIG15_HUMAN | 17 | 36086  | 1 |
| VWF_HUMAN   | 17 | 322401 | 1 |
| SYSM_HUMAN  | 16 | 58702  | 1 |
| P5CR2_HUMAN | 16 | 33958  | 1 |
| ZN404_HUMAN | 15 | 67264  | 1 |
| KIF12_HUMAN | 15 | 71813  | 1 |

---

**Table S1. Identification procedures of HHT specific binding proteins detected by ESI-Q-TOF MS/MS.**

---

The entire protein gel lanes were cut into 8 slices according to the protein marker

---

| <b>Slice1</b> | <b>Slice2</b> | <b>Slice3</b> | <b>Slice4</b> | <b>Slice5</b> | <b>Slice6</b> | <b>Slice7</b> | <b>Slice8</b> |
|---------------|---------------|---------------|---------------|---------------|---------------|---------------|---------------|
| >100(kDa)     | 95-100(kDa)   | 72-95(kDa)    | 55-72(kDa)    | 43-55(kDa)    | 34-43(kDa)    | 26-34(kDa)    | <26(kDa)      |

---

**Table S1. Identification procedures of HHT specific binding proteins detected by ESI-Q-TOF MS/MS.**

| removed proteins which were also detected in control (1176 proteins) |            |           |                    |
|----------------------------------------------------------------------|------------|-----------|--------------------|
| prot_acc                                                             | prot_score | prot_mass | prot_sequences_sig |
| MYH9_HUMAN                                                           | 26838      | 227646    | 79                 |
| MYH10_HUMAN                                                          | 3248       | 229827    | 25                 |
| MYH11_HUMAN                                                          | 2595       | 228054    | 8                  |
| MYH14_HUMAN                                                          | 1278       | 228701    | 4                  |
| ACACA_HUMAN                                                          | 9468       | 267095    | 79                 |
| SPTB2_HUMAN                                                          | 3510       | 275237    | 54                 |
| MY18A_HUMAN                                                          | 3215       | 234168    | 39                 |
| SPTN1_HUMAN                                                          | 3014       | 285163    | 56                 |
| PRKDC_HUMAN                                                          | 1917       | 473749    | 59                 |
| MYO1G_HUMAN                                                          | 1910       | 117395    | 30                 |
| PARP1_HUMAN                                                          | 1676       | 113811    | 26                 |
| CLH1_HUMAN                                                           | 1590       | 193260    | 32                 |
| CLH2_HUMAN                                                           | 369        | 189020    | 8                  |
| MYO1F_HUMAN                                                          | 1589       | 125507    | 21                 |
| MYO1E_HUMAN                                                          | 323        | 127552    | 3                  |
| DHX9_HUMAN                                                           | 1566       | 142181    | 25                 |
| FAS_HUMAN                                                            | 1522       | 275877    | 41                 |
| IQGA1_HUMAN                                                          | 1267       | 189761    | 34                 |
| PYR1_HUMAN                                                           | 1125       | 245167    | 27                 |
| HEAT1_HUMAN                                                          | 992        | 244382    | 30                 |
| FLII_HUMAN                                                           | 955        | 146142    | 21                 |
| K2C1_HUMAN                                                           | 944        | 66170     | 9                  |
| GFAP_HUMAN                                                           | 108        | 49907     | 1                  |
| NAT10_HUMAN                                                          | 829        | 116569    | 19                 |
| ACTG_HUMAN                                                           | 675        | 42108     | 9                  |
| ACTB_HUMAN                                                           | 628        | 42052     | 8                  |
| POTEE_HUMAN                                                          | 381        | 122882    | 3                  |
| ACTBL_HUMAN                                                          | 237        | 42318     | 3                  |
| ACTC_HUMAN                                                           | 222        | 42334     | 3                  |
| ACTA_HUMAN                                                           | 219        | 42381     | 2                  |
| ACTBM_HUMAN                                                          | 214        | 42331     | 2                  |
| POTEI_HUMAN                                                          | 21         | 122858    | 1                  |
| K1C10_HUMAN                                                          | 661        | 59020     | 9                  |
| TOP2B_HUMAN                                                          | 636        | 184122    | 19                 |
| TOP2A_HUMAN                                                          | 479        | 175017    | 15                 |
| HNRPU_HUMAN                                                          | 634        | 91269     | 7                  |
| BAZ1B_HUMAN                                                          | 617        | 172392    | 17                 |
| GCN1L_HUMAN                                                          | 617        | 294967    | 25                 |
| FLNB_HUMAN                                                           | 553        | 280157    | 24                 |
| FLNC_HUMAN                                                           | 99         | 293407    | 2                  |
| U520_HUMAN                                                           | 538        | 246006    | 18                 |
| RRP5_HUMAN                                                           | 529        | 209939    | 17                 |
| SYIC_HUMAN                                                           | 523        | 145718    | 20                 |
| MBB1A_HUMAN                                                          | 512        | 149731    | 9                  |
| PRP8_HUMAN                                                           | 499        | 274738    | 19                 |
| XPO1_HUMAN                                                           | 495        | 124447    | 15                 |
| SMCA5_HUMAN                                                          | 495        | 122513    | 14                 |
| SMCA1_HUMAN                                                          | 137        | 123211    | 4                  |
| U5S1_HUMAN                                                           | 479        | 110336    | 14                 |
| ACTN1_HUMAN                                                          | 470        | 103563    | 11                 |
| CNTRL_HUMAN                                                          | 468        | 269860    | 13                 |
| FSCN1_HUMAN                                                          | 459        | 55123     | 9                  |
| SPB1_HUMAN                                                           | 455        | 96898     | 9                  |
| NEB2_HUMAN                                                           | 448        | 89309     | 10                 |
| NUCL_HUMAN                                                           | 441        | 76625     | 6                  |
| MSH6_HUMAN                                                           | 438        | 154514    | 15                 |
| DYHC1_HUMAN                                                          | 433        | 534809    | 20                 |
| K22E_HUMAN                                                           | 430        | 65678     | 5                  |
| K2C6A_HUMAN                                                          | 151        | 60293     | 3                  |

|             |     |        |    |
|-------------|-----|--------|----|
| K2C5_HUMAN  | 122 | 62568  | 2  |
| K22O_HUMAN  | 90  | 66370  | 1  |
| SF3B3_HUMAN | 427 | 136575 | 11 |
| XPO2_HUMAN  | 422 | 111145 | 12 |
| H2B1B_HUMAN | 192 | 13942  | 2  |
| H2B1A_HUMAN | 106 | 14159  | 1  |
| NEK10_HUMAN | 47  | 134145 | 1  |
| CU129_HUMAN | 40  | 15541  | 1  |
| LPPRC_HUMAN | 407 | 159003 | 16 |
| UBA1_HUMAN  | 406 | 118858 | 9  |
| ENPL_HUMAN  | 401 | 92696  | 9  |
| SMHD1_HUMAN | 373 | 227942 | 7  |
| TLN1_HUMAN  | 354 | 271766 | 8  |
| PUR2_HUMAN  | 352 | 108953 | 13 |
| TBA1A_HUMAN | 338 | 50788  | 6  |
| TBA3C_HUMAN | 161 | 50612  | 4  |
| TBA4A_HUMAN | 108 | 50634  | 3  |
| TBA8_HUMAN  | 42  | 50746  | 2  |
| TBA4B_HUMAN | 20  | 27819  | 1  |
| ACLY_HUMAN  | 338 | 121674 | 10 |
| MATR3_HUMAN | 335 | 95078  | 4  |
| MYO5A_HUMAN | 329 | 216979 | 10 |
| UT14A_HUMAN | 324 | 88095  | 7  |
| UT14C_HUMAN | 118 | 87249  | 3  |
| C1TC_HUMAN  | 318 | 102180 | 10 |
| MCM3_HUMAN  | 314 | 91551  | 7  |
| SYLC_HUMAN  | 307 | 135577 | 12 |
| NOG2_HUMAN  | 306 | 83831  | 6  |
| DHX30_HUMAN | 305 | 134938 | 15 |
| TOP1_HUMAN  | 299 | 91125  | 8  |
| TOP1M_HUMAN | 91  | 70398  | 2  |
| COPA_HUMAN  | 299 | 139797 | 14 |
| AT2A2_HUMAN | 297 | 116336 | 7  |
| AT2A1_HUMAN | 64  | 111550 | 2  |
| H2AY_HUMAN  | 297 | 39764  | 7  |
| H2AW_HUMAN  | 92  | 40261  | 1  |
| RRP12_HUMAN | 287 | 145037 | 8  |
| NOL6_HUMAN  | 284 | 128368 | 8  |
| RFC1_HUMAN  | 278 | 128688 | 6  |
| TBB5_HUMAN  | 276 | 50095  | 7  |
| TBB2A_HUMAN | 234 | 50274  | 5  |
| TBB3_HUMAN  | 233 | 50856  | 4  |
| TBB4A_HUMAN | 211 | 50010  | 5  |
| TBB1_HUMAN  | 178 | 50865  | 2  |
| CHD4_HUMAN  | 276 | 219407 | 8  |
| CHD5_HUMAN  | 72  | 224506 | 2  |
| WDR3_HUMAN  | 273 | 107115 | 10 |
| UTP20_HUMAN | 270 | 320805 | 11 |
| SF3B1_HUMAN | 268 | 146479 | 11 |
| DDX21_HUMAN | 268 | 87804  | 8  |
| DDX50_HUMAN | 87  | 83084  | 2  |
| H4_HUMAN    | 257 | 11360  | 2  |
| WDR36_HUMAN | 256 | 106282 | 10 |
| XPOT_HUMAN  | 255 | 111148 | 5  |
| PO210_HUMAN | 249 | 205895 | 6  |
| SMC3_HUMAN  | 248 | 141853 | 9  |
| SYEP_HUMAN  | 247 | 172080 | 9  |
| TDIF2_HUMAN | 244 | 84817  | 6  |
| NOP2_HUMAN  | 243 | 89589  | 5  |
| HS90B_HUMAN | 236 | 83554  | 8  |
| HS90A_HUMAN | 187 | 85006  | 4  |
| TRAP1_HUMAN | 115 | 80345  | 1  |
| HS902_HUMAN | 48  | 39454  | 2  |



|             |     |        |    |
|-------------|-----|--------|----|
| H90B2_HUMAN | 43  | 44492  | 1  |
| H90B3_HUMAN | 37  | 68624  | 3  |
| HS904_HUMAN | 19  | 47796  | 1  |
| ATAD2_HUMAN | 234 | 159825 | 10 |
| ESYT1_HUMAN | 233 | 123293 | 6  |
| PWP2_HUMAN  | 228 | 103357 | 6  |
| GANAB_HUMAN | 225 | 107263 | 8  |
| NOP14_HUMAN | 225 | 98292  | 7  |
| NPA1P_HUMAN | 220 | 256508 | 11 |
| K1C9_HUMAN  | 218 | 62255  | 6  |
| DNLI3_HUMAN | 217 | 114317 | 8  |
| PELP1_HUMAN | 212 | 120879 | 7  |
| RPB2_HUMAN  | 209 | 135236 | 5  |
| COPB_HUMAN  | 207 | 108214 | 9  |
| NUMA1_HUMAN | 205 | 239199 | 10 |
| CROCC_HUMAN | 204 | 228787 | 8  |
| RENT1_HUMAN | 202 | 125578 | 9  |
| HSP74_HUMAN | 201 | 95127  | 5  |
| HS105_HUMAN | 187 | 97716  | 8  |
| HS74L_HUMAN | 36  | 95479  | 2  |
| CE128_HUMAN | 196 | 128565 | 5  |
| PERM_HUMAN  | 188 | 84784  | 7  |
| SP16H_HUMAN | 187 | 120409 | 10 |
| SUGP2_HUMAN | 186 | 121044 | 9  |
| KI67_HUMAN  | 184 | 360698 | 6  |
| ILF3_HUMAN  | 183 | 95678  | 5  |
| STRBP_HUMAN | 23  | 74290  | 1  |
| AT1A1_HUMAN | 182 | 114135 | 6  |
| AT1A3_HUMAN | 113 | 113102 | 3  |
| GELS_HUMAN  | 179 | 86043  | 7  |
| PSMD1_HUMAN | 174 | 106795 | 3  |
| MCM2_HUMAN  | 172 | 102516 | 7  |
| DSRAD_HUMAN | 162 | 137178 | 6  |
| UN13D_HUMAN | 160 | 124288 | 5  |
| EF2_HUMAN   | 154 | 96246  | 7  |
| H15_HUMAN   | 153 | 22566  | 2  |
| SIPA1_HUMAN | 152 | 112821 | 4  |
| SMC2_HUMAN  | 152 | 136085 | 8  |
| KIF23_HUMAN | 151 | 111016 | 6  |
| UHRF1_HUMAN | 150 | 91297  | 6  |
| SMC1A_HUMAN | 140 | 143771 | 8  |
| EF1A1_HUMAN | 138 | 50451  | 4  |
| EF1A2_HUMAN | 31  | 50780  | 2  |
| MYPT1_HUMAN | 135 | 115610 | 5  |
| PP12C_HUMAN | 36  | 85286  | 1  |
| SYMC_HUMAN  | 134 | 102249 | 5  |
| CND3_HUMAN  | 133 | 115345 | 3  |
| BOP1_HUMAN  | 133 | 84261  | 5  |
| MSH2_HUMAN  | 131 | 105418 | 4  |
| HNRL1_HUMAN | 129 | 96250  | 3  |
| HNRL2_HUMAN | 129 | 85622  | 4  |
| MPRIP_HUMAN | 123 | 117260 | 7  |
| CEBPZ_HUMAN | 118 | 121526 | 3  |
| RBM19_HUMAN | 116 | 107722 | 4  |
| PRP6_HUMAN  | 112 | 107656 | 5  |
| SND1_HUMAN  | 109 | 102618 | 4  |
| PDS5A_HUMAN | 107 | 152274 | 2  |
| WDR75_HUMAN | 105 | 95921  | 4  |
| MCM4_HUMAN  | 105 | 97068  | 4  |
| MCM6_HUMAN  | 102 | 93801  | 2  |
| EIF3B_HUMAN | 102 | 92823  | 3  |
| BMS1_HUMAN  | 101 | 146571 | 4  |
| MCCA_HUMAN  | 99  | 80935  | 3  |

|             |    |        |   |
|-------------|----|--------|---|
| PDIA1_HUMAN | 99 | 57480  | 3 |
| SYVC_HUMAN  | 99 | 141642 | 4 |
| CHD1L_HUMAN | 97 | 101491 | 4 |
| STOM_HUMAN  | 95 | 31882  | 1 |
| RS27A_HUMAN | 95 | 18296  | 1 |
| COPG1_HUMAN | 93 | 98967  | 5 |
| NPM_HUMAN   | 93 | 32726  | 2 |
| DDB1_HUMAN  | 92 | 128142 | 4 |
| PYGL_HUMAN  | 90 | 97486  | 3 |
| PYGB_HUMAN  | 19 | 97319  | 1 |
| ALBU_HUMAN  | 89 | 71317  | 2 |
| NOC3L_HUMAN | 89 | 92946  | 2 |
| TBL3_HUMAN  | 89 | 90347  | 4 |
| COR1C_HUMAN | 88 | 53899  | 2 |
| RSF1_HUMAN  | 87 | 165260 | 3 |
| ELYS_HUMAN  | 83 | 254223 | 3 |
| NOP56_HUMAN | 82 | 66408  | 2 |
| RPB1_HUMAN  | 79 | 218408 | 3 |
| RBM28_HUMAN | 79 | 86198  | 2 |
| DDX23_HUMAN | 78 | 95866  | 3 |
| MPP10_HUMAN | 74 | 78930  | 3 |
| ITPR2_HUMAN | 21 | 311060 | 1 |
| PR40A_HUMAN | 72 | 109022 | 2 |
| ADT3_HUMAN  | 71 | 33073  | 3 |
| ADT2_HUMAN  | 60 | 33059  | 3 |
| ADT1_HUMAN  | 36 | 33271  | 1 |
| RAD50_HUMAN | 70 | 154823 | 3 |
| SART3_HUMAN | 69 | 110721 | 4 |
| CP131_HUMAN | 67 | 122531 | 1 |
| NSUN2_HUMAN | 66 | 87214  | 4 |
| NOC2L_HUMAN | 66 | 85721  | 1 |
| DDX54_HUMAN | 62 | 98819  | 5 |
| ESF1_HUMAN  | 60 | 99134  | 2 |
| KDM1A_HUMAN | 59 | 93358  | 2 |
| HNRPM_HUMAN | 58 | 77749  | 2 |
| TCOF_HUMAN  | 57 | 152243 | 1 |
| SF3B2_HUMAN | 55 | 100279 | 1 |
| RL1D1_HUMAN | 53 | 55167  | 1 |
| K1C14_HUMAN | 53 | 51872  | 1 |
| DDX27_HUMAN | 53 | 90292  | 2 |
| MDC1_HUMAN  | 52 | 227669 | 4 |
| RL6_HUMAN   | 52 | 32765  | 1 |
| COPB2_HUMAN | 51 | 103278 | 4 |
| NOP58_HUMAN | 50 | 60054  | 2 |
| SFPQ_HUMAN  | 49 | 76216  | 2 |
| MCCB_HUMAN  | 49 | 61808  | 5 |
| TFR1_HUMAN  | 49 | 85274  | 2 |
| DNMT1_HUMAN | 49 | 185388 | 2 |
| SR140_HUMAN | 49 | 118675 | 3 |
| DYN1_HUMAN  | 35 | 97746  | 1 |
| F120A_HUMAN | 48 | 123008 | 3 |
| SAFB1_HUMAN | 48 | 103036 | 2 |
| SAFB2_HUMAN | 42 | 107921 | 1 |
| SMC4_HUMAN  | 48 | 147775 | 3 |
| RBM5_HUMAN  | 47 | 92610  | 1 |
| CENPC_HUMAN | 47 | 107396 | 1 |
| SVIL_HUMAN  | 46 | 249417 | 2 |
| AKAP9_HUMAN | 45 | 455725 | 1 |
| H2A1B_HUMAN | 45 | 14127  | 1 |
| IF2P_HUMAN  | 44 | 139198 | 2 |
| XRCC6_HUMAN | 41 | 70084  | 3 |
| XRCC5_HUMAN | 41 | 83222  | 4 |
| HP1B3_HUMAN | 41 | 61454  | 1 |

|             |      |        |    |
|-------------|------|--------|----|
| HNRPC_HUMAN | 40   | 33707  | 2  |
| HNRC1_HUMAN | 39   | 32180  | 1  |
| HSP72_HUMAN | 40   | 70263  | 1  |
| ABCF1_HUMAN | 39   | 96323  | 2  |
| TIF1B_HUMAN | 39   | 90261  | 2  |
| TERA_HUMAN  | 39   | 89950  | 1  |
| PFKAL_HUMAN | 38   | 85762  | 1  |
| BRPF1_HUMAN | 38   | 139066 | 1  |
| CHERP_HUMAN | 38   | 104150 | 2  |
| SK2L2_HUMAN | 38   | 118756 | 2  |
| HNRPK_HUMAN | 37   | 51230  | 1  |
| RPN2_HUMAN  | 37   | 69355  | 1  |
| PDC6I_HUMAN | 37   | 96590  | 2  |
| ACINU_HUMAN | 36   | 152170 | 2  |
| HACD3_HUMAN | 36   | 43360  | 1  |
| THOC2_HUMAN | 36   | 184541 | 2  |
| TECR_HUMAN  | 36   | 36410  | 1  |
| HNRPF_HUMAN | 34   | 45985  | 1  |
| C170L_HUMAN | 34   | 32628  | 1  |
| UGGG1_HUMAN | 33   | 177819 | 1  |
| MAPK2_HUMAN | 32   | 45938  | 1  |
| STAR7_HUMAN | 32   | 43257  | 1  |
| SHIP1_HUMAN | 32   | 134121 | 1  |
| DDX24_HUMAN | 31   | 96899  | 1  |
| CHD6_HUMAN  | 23   | 308071 | 1  |
| DDX10_HUMAN | 30   | 101168 | 2  |
| COR1A_HUMAN | 30   | 51678  | 1  |
| RB15B_HUMAN | 29   | 97432  | 1  |
| RL13_HUMAN  | 29   | 24304  | 1  |
| WIZ_HUMAN   | 29   | 180217 | 1  |
| DDX5_HUMAN  | 29   | 69618  | 1  |
| DDX3X_HUMAN | 29   | 73597  | 1  |
| ATD2B_HUMAN | 29   | 166351 | 1  |
| MYL6_HUMAN  | 28   | 17090  | 1  |
| DKC1_HUMAN  | 28   | 58094  | 1  |
| TPM1_HUMAN  | 28   | 32746  | 1  |
| CD44_HUMAN  | 25   | 82001  | 1  |
| PLCA_HUMAN  | 24   | 32038  | 1  |
| MAP4_HUMAN  | 23   | 121443 | 1  |
| 4F2_HUMAN   | 21   | 68180  | 1  |
| SPT6H_HUMAN | 21   | 200203 | 1  |
| PININ_HUMAN | 20   | 81679  | 1  |
| HBB_HUMAN   | 20   | 16102  | 1  |
| RPC2_HUMAN  | 19   | 129242 | 1  |
| DX39A_HUMAN | 18   | 49611  | 1  |
| NDUAA_HUMAN | 17   | 41067  | 1  |
| KPYM_HUMAN  | 17   | 58470  | 1  |
| RB_HUMAN    | 17   | 106947 | 1  |
| SMRC1_HUMAN | 17   | 123303 | 1  |
| CLIC1_HUMAN | 16   | 27248  | 1  |
| MA7D1_HUMAN | 15   | 93106  | 1  |
| RBM25_HUMAN | 15   | 100467 | 1  |
| HS905_HUMAN | 161  | 38942  | 2  |
| XPP3_HUMAN  | 113  | 57624  | 1  |
| PERE_HUMAN  | 65   | 81958  | 1  |
| IMB1_HUMAN  | 2721 | 98420  | 12 |
| MCM7_HUMAN  | 2311 | 81884  | 22 |
| RN123_HUMAN | 32   | 149960 | 1  |
| PFKAP_HUMAN | 2163 | 86454  | 16 |
| PFKAM_HUMAN | 138  | 85984  | 1  |
| K2C79_HUMAN | 319  | 58085  | 2  |
| K2C1B_HUMAN | 245  | 62149  | 1  |
| DHX15_HUMAN | 1451 | 91673  | 18 |

|             |     |        |    |
|-------------|-----|--------|----|
| DHX16_HUMAN | 42  | 119874 | 1  |
| KATL2_HUMAN | 51  | 61557  | 1  |
| MCM5_HUMAN  | 886 | 83031  | 16 |
| PSMD2_HUMAN | 850 | 100877 | 11 |
| POTEF_HUMAN | 222 | 123020 | 2  |
| PYGM_HUMAN  | 208 | 97487  | 4  |
| SYTC_HUMAN  | 595 | 84294  | 15 |
| NOL11_HUMAN | 563 | 82041  | 11 |
| SUZ12_HUMAN | 557 | 83744  | 6  |
| TEX10_HUMAN | 547 | 106349 | 11 |
| H2B1C_HUMAN | 495 | 13898  | 2  |
| H2B2C_HUMAN | 53  | 21971  | 1  |
| AATF_HUMAN  | 526 | 63208  | 12 |
| EFR3A_HUMAN | 513 | 93777  | 13 |
| SSRP1_HUMAN | 496 | 81367  | 10 |
| HNRPR_HUMAN | 493 | 71184  | 9  |
| HNRPQ_HUMAN | 81  | 69788  | 4  |
| SYQ_HUMAN   | 457 | 88655  | 13 |
| CALX_HUMAN  | 452 | 67982  | 6  |
| RRP1B_HUMAN | 427 | 84774  | 6  |
| MIC60_HUMAN | 425 | 84026  | 8  |
| TNPO1_HUMAN | 396 | 103771 | 12 |
| TNPO2_HUMAN | 180 | 102862 | 3  |
| LAS1L_HUMAN | 386 | 83982  | 11 |
| TBA1B_HUMAN | 376 | 50804  | 8  |
| ODFP2_HUMAN | 371 | 96140  | 10 |
| TRFM_HUMAN  | 360 | 81760  | 8  |
| ESYT2_HUMAN | 359 | 102807 | 11 |
| UBF1_HUMAN  | 355 | 89692  | 8  |
| VPS35_HUMAN | 354 | 92447  | 8  |
| DDX1_HUMAN  | 311 | 83349  | 11 |
| IF16_HUMAN  | 311 | 88656  | 6  |
| IFIX_HUMAN  | 159 | 55316  | 2  |
| STAT3_HUMAN | 292 | 88810  | 9  |
| NUP93_HUMAN | 290 | 93943  | 11 |
| MOGS_HUMAN  | 277 | 92032  | 5  |
| DDX51_HUMAN | 261 | 72983  | 8  |
| TBK1_HUMAN  | 257 | 84216  | 8  |
| NCBP1_HUMAN | 242 | 92864  | 8  |
| DAAF5_HUMAN | 214 | 94774  | 9  |
| H2A1A_HUMAN | 70  | 14225  | 1  |
| LIMA1_HUMAN | 198 | 85630  | 4  |
| PLOD1_HUMAN | 193 | 84068  | 7  |
| GYS1_HUMAN  | 183 | 84531  | 5  |
| ZW10_HUMAN  | 183 | 89628  | 7  |
| HSP7C_HUMAN | 181 | 71082  | 6  |
| GRP78_HUMAN | 80  | 72402  | 3  |
| HS71L_HUMAN | 97  | 70730  | 2  |
| OPA1_HUMAN  | 180 | 112131 | 9  |
| STA5A_HUMAN | 179 | 91161  | 6  |
| PNPT1_HUMAN | 169 | 86524  | 6  |
| TTC27_HUMAN | 155 | 97883  | 4  |
| IF4G2_HUMAN | 155 | 102810 | 8  |
| P5CS_HUMAN  | 154 | 87989  | 7  |
| CUL4A_HUMAN | 151 | 88138  | 4  |
| CSDE1_HUMAN | 149 | 89684  | 8  |
| KS6A4_HUMAN | 146 | 86122  | 5  |
| TNPO3_HUMAN | 145 | 105961 | 6  |
| K1C15_HUMAN | 53  | 49409  | 1  |
| GLU2B_HUMAN | 132 | 60357  | 4  |
| H12_HUMAN   | 128 | 21352  | 1  |
| ARHG6_HUMAN | 124 | 88698  | 5  |
| ARHG7_HUMAN | 68  | 90868  | 2  |

|             |     |        |   |
|-------------|-----|--------|---|
| LOXL3_HUMAN | 123 | 85280  | 4 |
| FUBP2_HUMAN | 122 | 73355  | 6 |
| MRE11_HUMAN | 121 | 80885  | 4 |
| DDX18_HUMAN | 118 | 75702  | 4 |
| XRCC1_HUMAN | 112 | 69776  | 3 |
| AKP8L_HUMAN | 112 | 72060  | 3 |
| EZH2_HUMAN  | 104 | 87247  | 3 |
| RPA34_HUMAN | 104 | 55236  | 7 |
| WRIP1_HUMAN | 100 | 72829  | 6 |
| AP1G1_HUMAN | 98  | 92148  | 2 |
| NUP98_HUMAN | 96  | 198597 | 3 |
| DDX17_HUMAN | 92  | 80906  | 3 |
| RIR1_HUMAN  | 87  | 90925  | 4 |
| ARBK1_HUMAN | 85  | 80321  | 3 |
| ARBK2_HUMAN | 47  | 80685  | 1 |
| RUNX1_HUMAN | 84  | 48877  | 2 |
| DDX31_HUMAN | 80  | 94770  | 3 |
| SDA1_HUMAN  | 80  | 80277  | 4 |
| SC23B_HUMAN | 65  | 87393  | 3 |
| UFL1_HUMAN  | 79  | 89996  | 6 |
| NOL10_HUMAN | 76  | 80822  | 3 |
| CUL1_HUMAN  | 76  | 90306  | 3 |
| PLCZ1_HUMAN | 68  | 70880  | 1 |
| NOL9_HUMAN  | 67  | 80527  | 2 |
| ACON_HUMAN  | 56  | 86113  | 2 |
| IL1AP_HUMAN | 50  | 66118  | 3 |
| CEP78_HUMAN | 48  | 77204  | 3 |
| LETM1_HUMAN | 47  | 83986  | 2 |
| GNL3_HUMAN  | 45  | 62468  | 1 |
| EZRI_HUMAN  | 44  | 69484  | 2 |
| PESC_HUMAN  | 43  | 68359  | 2 |
| KDM1B_HUMAN | 43  | 93465  | 2 |
| MTG8_HUMAN  | 42  | 68323  | 2 |
| TRI41_HUMAN | 40  | 72708  | 2 |
| THOC1_HUMAN | 38  | 76360  | 2 |
| MBD1_HUMAN  | 38  | 68788  | 2 |
| SCAFB_HUMAN | 34  | 166319 | 1 |
| MTA1_HUMAN  | 34  | 81420  | 1 |
| WBP11_HUMAN | 33  | 69954  | 2 |
| FUS_HUMAN   | 33  | 53622  | 1 |
| TF3C4_HUMAN | 32  | 93235  | 1 |
| PRPF3_HUMAN | 31  | 77652  | 1 |
| SYC2L_HUMAN | 30  | 94054  | 1 |
| EWS_HUMAN   | 30  | 68721  | 1 |
| KAT7_HUMAN  | 30  | 71282  | 1 |
| LRIF1_HUMAN | 29  | 84744  | 1 |
| NOG1_HUMAN  | 28  | 74317  | 1 |
| SUV3_HUMAN  | 28  | 88791  | 2 |
| TTL12_HUMAN | 28  | 75154  | 2 |
| THRB_HUMAN  | 25  | 71475  | 1 |
| ARNT2_HUMAN | 22  | 79268  | 1 |
| RL4_HUMAN   | 22  | 47953  | 2 |
| NATD1_HUMAN | 21  | 13195  | 1 |
| PSIP1_HUMAN | 20  | 60181  | 1 |
| GTPB1_HUMAN | 19  | 73035  | 1 |
| ZFP91_HUMAN | 19  | 64261  | 1 |
| FOKK1_HUMAN | 19  | 75867  | 1 |
| CCDC9_HUMAN | 18  | 59781  | 1 |
| RL18_HUMAN  | 18  | 21735  | 1 |
| PML_HUMAN   | 18  | 99143  | 1 |
| ATPA_HUMAN  | 18  | 59828  | 1 |
| ARI3B_HUMAN | 17  | 60714  | 1 |
| C4BPA_HUMAN | 17  | 69042  | 1 |

|             |      |       |    |
|-------------|------|-------|----|
| RA1L2_HUMAN | 16   | 34375 | 1  |
| HSP71_HUMAN | 888  | 70294 | 12 |
| HSP76_HUMAN | 530  | 71440 | 4  |
| GRP75_HUMAN | 1891 | 73920 | 14 |
| DDX3Y_HUMAN | 492  | 73564 | 7  |
| ANXA6_HUMAN | 1187 | 76168 | 15 |
| PABP1_HUMAN | 1153 | 70854 | 11 |
| PABP4_HUMAN | 396  | 71080 | 4  |
| PABP3_HUMAN | 606  | 70215 | 5  |
| K0020_HUMAN | 813  | 73937 | 16 |
| GRM1C_HUMAN | 65   | 76273 | 1  |
| SYRC_HUMAN  | 801  | 76129 | 16 |
| MOES_HUMAN  | 796  | 67892 | 15 |
| RADI_HUMAN  | 297  | 68635 | 6  |
| IF2B2_HUMAN | 703  | 66195 | 11 |
| IF2B3_HUMAN | 409  | 64008 | 10 |
| IF2B1_HUMAN | 83   | 63783 | 2  |
| GLGB_HUMAN  | 655  | 80879 | 14 |
| ECHA_HUMAN  | 616  | 83688 | 12 |
| RPN1_HUMAN  | 581  | 68641 | 13 |
| WDR46_HUMAN | 533  | 68485 | 12 |
| BTK_HUMAN   | 523  | 76917 | 11 |
| PYRG1_HUMAN | 519  | 67332 | 10 |
| RBM14_HUMAN | 509  | 69620 | 6  |
| URP2_HUMAN  | 500  | 76475 | 14 |
| NSF_HUMAN   | 475  | 83055 | 10 |
| TKT_HUMAN   | 470  | 68519 | 9  |
| CIR1A_HUMAN | 466  | 77526 | 8  |
| GT251_HUMAN | 432  | 71933 | 9  |
| LMNB1_HUMAN | 431  | 66653 | 7  |
| PCKGM_HUMAN | 378  | 71483 | 12 |
| ACSL4_HUMAN | 376  | 80220 | 11 |
| ACSL3_HUMAN | 108  | 81338 | 3  |
| AFG32_HUMAN | 373  | 88984 | 8  |
| MTA2_HUMAN  | 363  | 75717 | 9  |
| WDR43_HUMAN | 323  | 75813 | 7  |
| RGAP1_HUMAN | 320  | 71666 | 8  |
| SRP72_HUMAN | 313  | 75130 | 9  |
| RBM39_HUMAN | 298  | 59628 | 5  |
| TBB6_HUMAN  | 188  | 50281 | 4  |
| RFA1_HUMAN  | 286  | 68723 | 10 |
| DNM1L_HUMAN | 278  | 82339 | 8  |
| SYK_HUMAN   | 277  | 68461 | 11 |
| ADAS_HUMAN  | 274  | 73664 | 7  |
| NUP85_HUMAN | 262  | 75826 | 7  |
| RBP56_HUMAN | 251  | 62021 | 3  |
| PDIA4_HUMAN | 247  | 73229 | 8  |
| ZN326_HUMAN | 216  | 65955 | 4  |
| TBC15_HUMAN | 208  | 80352 | 6  |
| GUAA_HUMAN  | 205  | 77408 | 6  |
| KIF22_HUMAN | 186  | 73616 | 5  |
| RAVR1_HUMAN | 186  | 64464 | 3  |
| FXR1_HUMAN  | 183  | 70020 | 5  |
| NDUS1_HUMAN | 166  | 80443 | 8  |
| FBX46_HUMAN | 163  | 65731 | 6  |
| CPSF6_HUMAN | 163  | 59344 | 5  |
| E2AK2_HUMAN | 159  | 62512 | 4  |
| VATA_HUMAN  | 156  | 68660 | 3  |
| PARN_HUMAN  | 153  | 73918 | 4  |
| GNL3L_HUMAN | 144  | 66216 | 7  |
| DDX41_HUMAN | 142  | 70477 | 5  |
| UTP18_HUMAN | 141  | 62421 | 2  |
| ASM3B_HUMAN | 138  | 51237 | 5  |

|             |      |        |    |
|-------------|------|--------|----|
| MTF2_HUMAN  | 133  | 68374  | 6  |
| LMNB2_HUMAN | 133  | 67762  | 5  |
| CENPB_HUMAN | 132  | 65531  | 3  |
| HNRPL_HUMAN | 129  | 64720  | 4  |
| DHX33_HUMAN | 129  | 79565  | 4  |
| GFPT1_HUMAN | 127  | 79555  | 6  |
| ANM5_HUMAN  | 124  | 73322  | 5  |
| NOP9_HUMAN  | 123  | 70136  | 4  |
| ABCF2_HUMAN | 119  | 71815  | 6  |
| RED_HUMAN   | 117  | 65676  | 4  |
| EIF3D_HUMAN | 108  | 64560  | 3  |
| COIL_HUMAN  | 102  | 63254  | 4  |
| SAS10_HUMAN | 88   | 54639  | 2  |
| DDX55_HUMAN | 82   | 69073  | 2  |
| LAP2A_HUMAN | 79   | 76016  | 3  |
| LAP2B_HUMAN | 24   | 50696  | 1  |
| DDX52_HUMAN | 79   | 67798  | 4  |
| MECP2_HUMAN | 77   | 52580  | 2  |
| NO66_HUMAN  | 76   | 71384  | 3  |
| ZCCHV_HUMAN | 75   | 103135 | 4  |
| KEAP1_HUMAN | 73   | 71160  | 1  |
| ARHG8_HUMAN | 69   | 68154  | 1  |
| RPAP3_HUMAN | 68   | 75957  | 2  |
| MET13_HUMAN | 67   | 79573  | 3  |
| LARP7_HUMAN | 66   | 67143  | 2  |
| MIRO1_HUMAN | 63   | 71765  | 1  |
| PAF1_HUMAN  | 61   | 60110  | 3  |
| ACS2L_HUMAN | 60   | 75664  | 2  |
| MEN1_HUMAN  | 59   | 68380  | 2  |
| FUBP1_HUMAN | 59   | 67690  | 4  |
| FUBP3_HUMAN | 27   | 61944  | 1  |
| VTNC_HUMAN  | 58   | 55069  | 1  |
| PWP1_HUMAN  | 57   | 56363  | 3  |
| CRNL1_HUMAN | 51   | 100902 | 2  |
| DAF_HUMAN   | 50   | 42400  | 2  |
| SPA5L_HUMAN | 49   | 81515  | 3  |
| ZN512_HUMAN | 46   | 65724  | 2  |
| IF4A1_HUMAN | 45   | 46353  | 1  |
| ATD3A_HUMAN | 45   | 71610  | 1  |
| HNRH1_HUMAN | 43   | 49484  | 1  |
| MFAP1_HUMAN | 43   | 51927  | 2  |
| TCPG_HUMAN  | 39   | 61066  | 2  |
| SNW1_HUMAN  | 35   | 61514  | 1  |
| UTP6_HUMAN  | 33   | 70776  | 1  |
| SBP1_HUMAN  | 33   | 52928  | 1  |
| HSPB1_HUMAN | 33   | 22826  | 1  |
| SCML2_HUMAN | 30   | 78063  | 1  |
| STIP1_HUMAN | 28   | 63227  | 1  |
| RS4X_HUMAN  | 27   | 29807  | 1  |
| PDE12_HUMAN | 27   | 68221  | 1  |
| FSIP2_HUMAN | 27   | 785878 | 1  |
| SEPT9_HUMAN | 26   | 65646  | 2  |
| SATB1_HUMAN | 24   | 86246  | 2  |
| PDIP2_HUMAN | 22   | 42235  | 1  |
| KHDR1_HUMAN | 21   | 48311  | 1  |
| MDHM_HUMAN  | 20   | 35937  | 1  |
| ABCE1_HUMAN | 19   | 68240  | 1  |
| SPDE1_HUMAN | 17   | 41041  | 1  |
| DHB4_HUMAN  | 17   | 80092  | 1  |
| CH60_HUMAN  | 2272 | 61187  | 23 |
| KPYR_HUMAN  | 96   | 62191  | 1  |
| TBAL3_HUMAN | 92   | 50675  | 1  |
| TCPD_HUMAN  | 1233 | 58401  | 14 |

|             |      |       |    |
|-------------|------|-------|----|
| TCPA_HUMAN  | 1229 | 60819 | 17 |
| TCPQ_HUMAN  | 1167 | 60153 | 17 |
| TCPE_HUMAN  | 822  | 60089 | 14 |
| P4HA1_HUMAN | 821  | 61296 | 10 |
| TBB8L_HUMAN | 356  | 50168 | 3  |
| TCPH_HUMAN  | 808  | 59842 | 12 |
| NOC4L_HUMAN | 768  | 58830 | 15 |
| ATD3C_HUMAN | 464  | 46635 | 6  |
| ATD3B_HUMAN | 258  | 73098 | 6  |
| TCPZ_HUMAN  | 725  | 58444 | 12 |
| TCPW_HUMAN  | 198  | 58355 | 3  |
| CPNE2_HUMAN | 656  | 61835 | 11 |
| CPNE3_HUMAN | 93   | 60947 | 1  |
| U2AF2_HUMAN | 630  | 53809 | 9  |
| G6PI_HUMAN  | 594  | 63335 | 8  |
| PUR9_HUMAN  | 585  | 65089 | 16 |
| EIF3L_HUMAN | 534  | 66912 | 12 |
| IMA1_HUMAN  | 508  | 58168 | 9  |
| SYNC_HUMAN  | 490  | 63758 | 12 |
| UTP15_HUMAN | 477  | 58721 | 7  |
| AP2S1_HUMAN | 77   | 17178 | 1  |
| TBL1R_HUMAN | 370  | 56187 | 8  |
| FKBP4_HUMAN | 366  | 52057 | 9  |
| PSMD3_HUMAN | 351  | 61054 | 11 |
| RTCB_HUMAN  | 339  | 55688 | 9  |
| CGAS_HUMAN  | 328  | 59462 | 9  |
| PDIA3_HUMAN | 323  | 57146 | 8  |
| CALR_HUMAN  | 321  | 48283 | 5  |
| IMA5_HUMAN  | 260  | 60925 | 7  |
| EHD1_HUMAN  | 315  | 60646 | 10 |
| EHD3_HUMAN  | 64   | 60906 | 3  |
| NCLN_HUMAN  | 314  | 63106 | 10 |
| LRRF2_HUMAN | 309  | 82349 | 5  |
| SF3A3_HUMAN | 307  | 59154 | 5  |
| MAOM_HUMAN  | 299  | 66029 | 9  |
| SYYC_HUMAN  | 291  | 59448 | 8  |
| SNUT2_HUMAN | 281  | 65739 | 11 |
| 2AAB_HUMAN  | 149  | 66799 | 7  |
| PRS8_HUMAN  | 43   | 45768 | 1  |
| NONO_HUMAN  | 248  | 54311 | 5  |
| RCC2_HUMAN  | 244  | 56790 | 8  |
| AAAS_HUMAN  | 237  | 60392 | 9  |
| UBP14_HUMAN | 237  | 56489 | 4  |
| PTBP1_HUMAN | 236  | 57357 | 8  |
| DDX28_HUMAN | 236  | 59773 | 7  |
| EI2BD_HUMAN | 230  | 58035 | 6  |
| NELFD_HUMAN | 210  | 66832 | 6  |
| LYN_HUMAN   | 206  | 58993 | 9  |
| YES_HUMAN   | 116  | 61276 | 6  |
| IMDH2_HUMAN | 206  | 56226 | 5  |
| IRAK3_HUMAN | 201  | 68864 | 8  |
| HDAC1_HUMAN | 199  | 55638 | 5  |
| HDAC2_HUMAN | 170  | 55899 | 4  |
| CCD86_HUMAN | 197  | 40325 | 4  |
| U3IP2_HUMAN | 197  | 52436 | 2  |
| GRWD1_HUMAN | 194  | 49787 | 7  |
| G3BP1_HUMAN | 178  | 52189 | 7  |
| DD19A_HUMAN | 178  | 54397 | 3  |
| DDX56_HUMAN | 167  | 62007 | 6  |
| WDR1_HUMAN  | 165  | 66836 | 5  |
| CEP63_HUMAN | 160  | 81863 | 4  |
| GSCR2_HUMAN | 160  | 54470 | 4  |
| PRP19_HUMAN | 157  | 55603 | 7  |



|             |     |        |   |
|-------------|-----|--------|---|
| CTSL2_HUMAN | 153 | 53137  | 5 |
| SCOT1_HUMAN | 151 | 56578  | 6 |
| RD23B_HUMAN | 151 | 43202  | 5 |
| SERA_HUMAN  | 144 | 57356  | 5 |
| NELFB_HUMAN | 143 | 66283  | 3 |
| NMT1_HUMAN  | 142 | 57112  | 4 |
| EXOS9_HUMAN | 140 | 49545  | 3 |
| ADCK3_HUMAN | 133 | 72418  | 5 |
| PUF60_HUMAN | 130 | 60009  | 7 |
| ETV6_HUMAN  | 130 | 53252  | 3 |
| SYSC_HUMAN  | 129 | 59253  | 4 |
| RU17_HUMAN  | 118 | 51583  | 3 |
| STAU1_HUMAN | 117 | 63428  | 7 |
| SSF1_HUMAN  | 116 | 53446  | 4 |
| SMRD2_HUMAN | 115 | 59112  | 5 |
| DLDH_HUMAN  | 115 | 54713  | 2 |
| VPS4B_HUMAN | 114 | 49443  | 3 |
| FIGL1_HUMAN | 86  | 74829  | 1 |
| CATA_HUMAN  | 110 | 59947  | 3 |
| RCOR3_HUMAN | 47  | 55661  | 2 |
| HNRH2_HUMAN | 59  | 49517  | 1 |
| DCTN4_HUMAN | 94  | 53216  | 4 |
| APC7_HUMAN  | 90  | 67440  | 2 |
| RRP8_HUMAN  | 85  | 51424  | 5 |
| IKZF1_HUMAN | 85  | 58632  | 2 |
| SF3A2_HUMAN | 77  | 49338  | 3 |
| KHDR2_HUMAN | 21  | 38904  | 1 |
| K1C19_HUMAN | 64  | 44079  | 2 |
| YBOX3_HUMAN | 68  | 40066  | 1 |
| CPSF7_HUMAN | 57  | 52189  | 3 |
| MATK_HUMAN  | 56  | 57003  | 4 |
| ELF1_HUMAN  | 53  | 67684  | 2 |
| MA2B1_HUMAN | 53  | 114357 | 2 |
| DHAK_HUMAN  | 48  | 59252  | 4 |
| GRP2_HUMAN  | 46  | 70060  | 2 |
| PRP31_HUMAN | 45  | 55649  | 1 |
| SUH_HUMAN   | 43  | 56343  | 2 |
| DEK_HUMAN   | 42  | 42933  | 4 |
| TOE1_HUMAN  | 39  | 57367  | 3 |
| ANT3_HUMAN  | 37  | 53025  | 1 |
| RCC1_HUMAN  | 35  | 45397  | 1 |
| SNX27_HUMAN | 32  | 61854  | 1 |
| FBRL_HUMAN  | 29  | 33877  | 1 |
| RL7A_HUMAN  | 26  | 30148  | 1 |
| ATPB_HUMAN  | 23  | 56525  | 1 |
| MTND_HUMAN  | 20  | 21542  | 1 |
| HMCS1_HUMAN | 20  | 57828  | 1 |
| RL7_HUMAN   | 19  | 29264  | 1 |
| SRFB1_HUMAN | 19  | 48718  | 1 |
| HNRPD_HUMAN | 17  | 38581  | 1 |
| CE290_HUMAN | 16  | 290892 | 1 |
| PLMN_HUMAN  | 16  | 93247  | 1 |
| PGK1_HUMAN  | 453 | 44985  | 2 |
| YBOX1_HUMAN | 274 | 35903  | 2 |
| RUVB2_HUMAN | 271 | 51296  | 6 |
| IDHP_HUMAN  | 228 | 51333  | 3 |
| EBP2_HUMAN  | 200 | 34887  | 3 |
| RBMX_HUMAN  | 165 | 42306  | 2 |
| RMXL1_HUMAN | 152 | 42173  | 1 |
| RMXL2_HUMAN | 37  | 42959  | 1 |
| ENOA_HUMAN  | 163 | 47481  | 1 |
| ARP3_HUMAN  | 141 | 47797  | 5 |
| VRK1_HUMAN  | 122 | 45790  | 3 |

|             |     |        |   |
|-------------|-----|--------|---|
| DNJA1_HUMAN | 116 | 45581  | 1 |
| BZW1_HUMAN  | 114 | 48184  | 2 |
| SYDC_HUMAN  | 108 | 57499  | 2 |
| ARP2_HUMAN  | 103 | 45017  | 3 |
| RBBP4_HUMAN | 99  | 47911  | 3 |
| METK2_HUMAN | 97  | 43975  | 3 |
| METK1_HUMAN | 38  | 44190  | 1 |
| CG025_HUMAN | 95  | 46707  | 1 |
| THIL_HUMAN  | 92  | 45456  | 2 |
| ODO2_HUMAN  | 91  | 49067  | 2 |
| UMPS_HUMAN  | 90  | 52645  | 1 |
| RRP15_HUMAN | 83  | 31636  | 2 |
| ILEU_HUMAN  | 83  | 42829  | 2 |
| Z355P_HUMAN | 78  | 51424  | 1 |
| MAK16_HUMAN | 75  | 35689  | 2 |
| EIF3F_HUMAN | 74  | 37654  | 2 |
| TMOD3_HUMAN | 71  | 39741  | 3 |
| TMOD1_HUMAN | 39  | 40658  | 1 |
| PUR6_HUMAN  | 67  | 47790  | 3 |
| STK26_HUMAN | 67  | 46785  | 2 |
| S10A8_HUMAN | 67  | 10885  | 1 |
| ILF2_HUMAN  | 66  | 43263  | 1 |
| PA2G4_HUMAN | 65  | 44101  | 2 |
| F10A1_HUMAN | 65  | 41477  | 1 |
| RTN4_HUMAN  | 64  | 130250 | 1 |
| GNAS1_HUMAN | 64  | 111697 | 2 |
| DHE3_HUMAN  | 61  | 61701  | 1 |
| DNJA2_HUMAN | 56  | 46344  | 1 |
| ROA2_HUMAN  | 54  | 37464  | 1 |
| EFTU_HUMAN  | 53  | 49852  | 1 |
| EIF3E_HUMAN | 52  | 52587  | 1 |
| FLOT2_HUMAN | 52  | 47434  | 1 |
| GNAI2_HUMAN | 49  | 40995  | 1 |
| PSD11_HUMAN | 46  | 47719  | 2 |
| MRRP1_HUMAN | 44  | 47602  | 1 |
| BYST_HUMAN  | 44  | 49798  | 1 |
| CP51A_HUMAN | 40  | 57169  | 1 |
| GALK1_HUMAN | 39  | 42702  | 3 |
| IF4A3_HUMAN | 39  | 47126  | 1 |
| PDIA6_HUMAN | 39  | 48490  | 1 |
| WDR12_HUMAN | 39  | 48191  | 1 |
| TRI27_HUMAN | 38  | 59763  | 1 |
| RL3_HUMAN   | 37  | 46365  | 1 |
| LA_HUMAN    | 36  | 46979  | 1 |
| RPAC1_HUMAN | 35  | 39453  | 1 |
| CI114_HUMAN | 34  | 42496  | 1 |
| FLOT1_HUMAN | 29  | 47554  | 2 |
| DAPK3_HUMAN | 28  | 52674  | 1 |
| EF1G_HUMAN  | 28  | 50429  | 1 |
| DDX47_HUMAN | 27  | 50900  | 1 |
| AMPL_HUMAN  | 26  | 56530  | 1 |
| MKL1_HUMAN  | 25  | 99257  | 1 |
| MMTA2_HUMAN | 24  | 29679  | 1 |
| WDR55_HUMAN | 24  | 42557  | 1 |
| KRR1_HUMAN  | 24  | 43866  | 1 |
| DCA13_HUMAN | 21  | 51996  | 1 |
| PSMD6_HUMAN | 21  | 45787  | 1 |
| GSK3B_HUMAN | 20  | 47228  | 1 |
| RBM34_HUMAN | 18  | 48649  | 1 |
| CQ080_HUMAN | 16  | 68356  | 1 |
| MB211_HUMAN | 22  | 41671  | 1 |
| PP1A_HUMAN  | 965 | 38229  | 9 |
| PP1G_HUMAN  | 807 | 37701  | 8 |
| PP1B_HUMAN  | 780 | 37961  | 7 |
| GNAI3_HUMAN | 377 | 41076  | 4 |
| GNA13_HUMAN | 75  | 44364  | 2 |

|             |     |        |    |
|-------------|-----|--------|----|
| GNAI1_HUMAN | 292 | 40905  | 2  |
| FBLL1_HUMAN | 415 | 34711  | 2  |
| G3P_HUMAN   | 792 | 36201  | 8  |
| RLA0_HUMAN  | 697 | 34423  | 6  |
| RLA0L_HUMAN | 388 | 34514  | 3  |
| ROA3_HUMAN  | 621 | 39799  | 7  |
| MK67I_HUMAN | 507 | 34372  | 9  |
| EF1D_HUMAN  | 425 | 31217  | 6  |
| EIF3I_HUMAN | 372 | 36878  | 6  |
| LDHB_HUMAN  | 362 | 36900  | 5  |
| SERC_HUMAN  | 320 | 40796  | 8  |
| PHB2_HUMAN  | 319 | 33276  | 6  |
| ARC1B_HUMAN | 306 | 41722  | 5  |
| RFC5_HUMAN  | 305 | 38757  | 10 |
| NACAM_HUMAN | 283 | 205979 | 4  |
| CAZA1_HUMAN | 267 | 33073  | 7  |
| CAZA2_HUMAN | 157 | 33157  | 4  |
| CDK6_HUMAN  | 266 | 37257  | 5  |
| DCAF7_HUMAN | 237 | 39528  | 2  |
| RFC4_HUMAN  | 237 | 40170  | 4  |
| CENPV_HUMAN | 226 | 30383  | 4  |
| RCL1_HUMAN  | 221 | 41273  | 6  |
| HNRDL_HUMAN | 216 | 46580  | 6  |
| RALY_HUMAN  | 213 | 32501  | 2  |
| RALYL_HUMAN | 115 | 32425  | 1  |
| LDHA_HUMAN  | 207 | 36950  | 6  |
| TEAD1_HUMAN | 25  | 48314  | 1  |
| NGDN_HUMAN  | 205 | 35872  | 2  |
| HNRH3_HUMAN | 201 | 36960  | 2  |
| PSD13_HUMAN | 198 | 43203  | 7  |
| VDAC1_HUMAN | 195 | 30868  | 5  |
| VDAC3_HUMAN | 74  | 30981  | 1  |
| ROAA_HUMAN  | 194 | 36316  | 5  |
| PCBP2_HUMAN | 193 | 38955  | 4  |
| PCBP3_HUMAN | 186 | 39725  | 3  |
| PCBP1_HUMAN | 183 | 37987  | 4  |
| RL5_HUMAN   | 186 | 34569  | 5  |
| TRA2B_HUMAN | 181 | 33760  | 2  |
| LEG9_HUMAN  | 179 | 39835  | 3  |
| LEG9B_HUMAN | 111 | 39977  | 2  |
| ABT1_HUMAN  | 177 | 31117  | 5  |
| BACH_HUMAN  | 171 | 42454  | 5  |
| VDAC2_HUMAN | 165 | 32060  | 4  |
| CDCA5_HUMAN | 164 | 27755  | 3  |
| PRPS2_HUMAN | 163 | 35146  | 4  |
| PRPS1_HUMAN | 146 | 35325  | 3  |
| PRPS3_HUMAN | 100 | 35387  | 2  |
| RBM4_HUMAN  | 158 | 40688  | 2  |
| RBM4B_HUMAN | 67  | 40466  | 2  |
| RRP7A_HUMAN | 156 | 32485  | 4  |
| ODPB_HUMAN  | 153 | 39550  | 5  |
| CCNY_HUMAN  | 149 | 39825  | 5  |
| IF2A_HUMAN  | 147 | 36374  | 4  |
| ALDOA_HUMAN | 144 | 39851  | 2  |
| IMP4_HUMAN  | 144 | 33850  | 3  |
| AURKB_HUMAN | 137 | 39571  | 5  |
| DNJB1_HUMAN | 137 | 38191  | 5  |
| IDH3A_HUMAN | 127 | 40022  | 3  |
| ADPPT_HUMAN | 123 | 35981  | 4  |
| SNR40_HUMAN | 123 | 39742  | 6  |
| RPF2_HUMAN  | 122 | 35731  | 4  |
| AATM_HUMAN  | 119 | 47886  | 3  |
| STING_HUMAN | 118 | 42736  | 2  |
| PSMD7_HUMAN | 118 | 37060  | 3  |
| TRA2A_HUMAN | 118 | 32726  | 2  |
| GNAQ_HUMAN  | 112 | 42400  | 3  |

|             |     |        |   |
|-------------|-----|--------|---|
| GNA11_HUMAN | 103 | 42382  | 2 |
| DIM1_HUMAN  | 111 | 35499  | 5 |
| ROA0_HUMAN  | 111 | 30993  | 4 |
| AIMP2_HUMAN | 109 | 35668  | 3 |
| MTNA_HUMAN  | 107 | 39467  | 1 |
| AN32E_HUMAN | 105 | 30902  | 3 |
| SETLP_HUMAN | 104 | 34861  | 2 |
| RFC3_HUMAN  | 101 | 41328  | 4 |
| GBB2_HUMAN  | 87  | 38048  | 1 |
| AAKG1_HUMAN | 97  | 37727  | 3 |
| ADHX_HUMAN  | 94  | 40554  | 2 |
| PCID2_HUMAN | 94  | 46627  | 4 |
| AIP_HUMAN   | 94  | 38068  | 4 |
| SRSF5_HUMAN | 91  | 31359  | 2 |
| RNPS1_HUMAN | 90  | 34188  | 2 |
| CDK9_HUMAN  | 89  | 43149  | 3 |
| OTUB1_HUMAN | 85  | 31492  | 3 |
| NB5R3_HUMAN | 82  | 34441  | 1 |
| CA131_HUMAN | 78  | 32804  | 2 |
| TXNL1_HUMAN | 76  | 32630  | 1 |
| PARVG_HUMAN | 75  | 37576  | 2 |
| ANM1_HUMAN  | 73  | 42059  | 2 |
| AK1A1_HUMAN | 73  | 36892  | 3 |
| MTDC_HUMAN  | 72  | 38042  | 3 |
| SGTA_HUMAN  | 72  | 34270  | 1 |
| NDUA9_HUMAN | 69  | 42654  | 2 |
| U2AF1_HUMAN | 69  | 28368  | 1 |
| PSDE_HUMAN  | 68  | 34726  | 2 |
| APEX1_HUMAN | 65  | 35931  | 1 |
| PCNA_HUMAN  | 65  | 29092  | 3 |
| IPYR_HUMAN  | 64  | 33095  | 3 |
| IPYR2_HUMAN | 49  | 38409  | 1 |
| RT29_HUMAN  | 64  | 45880  | 3 |
| PGK2_HUMAN  | 59  | 45166  | 2 |
| ANXA2_HUMAN | 63  | 38808  | 4 |
| FPPS_HUMAN  | 62  | 48758  | 3 |
| LC7L2_HUMAN | 61  | 46942  | 3 |
| SRS10_HUMAN | 61  | 31339  | 2 |
| SRS12_HUMAN | 49  | 30665  | 1 |
| ISY1_HUMAN  | 60  | 33029  | 1 |
| PR38A_HUMAN | 59  | 37681  | 1 |
| MO4L1_HUMAN | 59  | 41562  | 3 |
| MO4L2_HUMAN | 54  | 32345  | 1 |
| KCRB_HUMAN  | 58  | 42902  | 2 |
| THOC3_HUMAN | 57  | 39431  | 2 |
| TALDO_HUMAN | 56  | 37688  | 1 |
| MK14_HUMAN  | 56  | 41495  | 2 |
| BRX1_HUMAN  | 52  | 41660  | 3 |
| ARK72_HUMAN | 52  | 40020  | 1 |
| RFC2_HUMAN  | 50  | 39588  | 1 |
| UCHL5_HUMAN | 50  | 37868  | 2 |
| PINX1_HUMAN | 50  | 37183  | 1 |
| ARHG1_HUMAN | 50  | 103056 | 2 |
| ODPA_HUMAN  | 48  | 43952  | 2 |
| STRAP_HUMAN | 47  | 38756  | 2 |
| SPI1_HUMAN  | 47  | 31177  | 2 |
| NTH_HUMAN   | 45  | 34767  | 1 |
| DJB11_HUMAN | 42  | 40774  | 1 |
| NUP37_HUMAN | 42  | 37140  | 2 |
| TFB1M_HUMAN | 42  | 39860  | 2 |
| RRP1_HUMAN  | 40  | 53035  | 1 |
| MAP11_HUMAN | 39  | 44100  | 2 |
| RPR1A_HUMAN | 38  | 35926  | 1 |
| KC1A_HUMAN  | 37  | 39118  | 2 |
| RL14_HUMAN  | 37  | 23531  | 1 |
| ESTD_HUMAN  | 36  | 31956  | 1 |

|             |      |        |    |
|-------------|------|--------|----|
| TDIF1_HUMAN | 36   | 37275  | 1  |
| CDK7_HUMAN  | 34   | 39299  | 1  |
| VP26A_HUMAN | 34   | 38260  | 2  |
| CMS1_HUMAN  | 34   | 32149  | 1  |
| ZN761_HUMAN | 34   | 90627  | 1  |
| NALP3_HUMAN | 33   | 120662 | 1  |
| SEC13_HUMAN | 32   | 36031  | 1  |
| BIEA_HUMAN  | 32   | 33692  | 1  |
| PDIP3_HUMAN | 31   | 46289  | 1  |
| H1X_HUMAN   | 30   | 22474  | 1  |
| SUCA_HUMAN  | 29   | 36626  | 2  |
| ASNA_HUMAN  | 28   | 39224  | 2  |
| NSDHL_HUMAN | 28   | 42159  | 2  |
| FEN1_HUMAN  | 27   | 42908  | 1  |
| DNJC9_HUMAN | 26   | 30062  | 1  |
| ATPG_HUMAN  | 25   | 33032  | 1  |
| RS3_HUMAN   | 25   | 26842  | 1  |
| BUB3_HUMAN  | 25   | 37587  | 1  |
| DCD_HUMAN   | 25   | 11391  | 1  |
| ELAV1_HUMAN | 24   | 36240  | 1  |
| HEM6_HUMAN  | 23   | 50918  | 1  |
| 3MG_HUMAN   | 22   | 33247  | 1  |
| ACOD_HUMAN  | 21   | 41667  | 1  |
| I20L2_HUMAN | 20   | 39415  | 1  |
| RPB3_HUMAN  | 19   | 31764  | 1  |
| RL19_HUMAN  | 19   | 23565  | 1  |
| IDH3G_HUMAN | 18   | 43166  | 1  |
| ZADH2_HUMAN | 17   | 40457  | 1  |
| RL10L_HUMAN | 16   | 24959  | 1  |
| CD11A_HUMAN | 16   | 91534  | 1  |
| TPM3_HUMAN  | 1112 | 32987  | 5  |
| TPM2_HUMAN  | 803  | 32945  | 3  |
| SRSF1_HUMAN | 1050 | 27842  | 7  |
| RS8_HUMAN   | 954  | 24475  | 6  |
| GBLP_HUMAN  | 735  | 35511  | 10 |
| RL10A_HUMAN | 658  | 24987  | 7  |
| ADT4_HUMAN  | 53   | 35285  | 1  |
| CDK1_HUMAN  | 486  | 34131  | 10 |
| RS6_HUMAN   | 481  | 28834  | 3  |
| MRT4_HUMAN  | 416  | 27657  | 6  |
| RAN_HUMAN   | 401  | 24579  | 5  |
| 1433E_HUMAN | 388  | 29326  | 5  |
| 1433T_HUMAN | 310  | 28032  | 4  |
| 1433Z_HUMAN | 285  | 27899  | 4  |
| 1433B_HUMAN | 277  | 28179  | 2  |
| 1433F_HUMAN | 195  | 28372  | 2  |
| RS2_HUMAN   | 373  | 31590  | 5  |
| RSMB_HUMAN  | 359  | 24765  | 3  |
| RL7L_HUMAN  | 349  | 28757  | 7  |
| ARPC2_HUMAN | 349  | 34426  | 5  |
| DHB12_HUMAN | 342  | 34416  | 7  |
| RS3A_HUMAN  | 325  | 30154  | 5  |
| RU2A_HUMAN  | 313  | 28512  | 5  |
| PHB_HUMAN   | 311  | 29843  | 7  |
| SRSF9_HUMAN | 307  | 25640  | 7  |
| CAPZB_HUMAN | 292  | 31616  | 5  |
| NEP1_HUMAN  | 289  | 26931  | 6  |
| PRDX6_HUMAN | 271  | 25133  | 7  |
| MPCP_HUMAN  | 250  | 40525  | 5  |
| TADBP_HUMAN | 249  | 45053  | 2  |
| IF6_HUMAN   | 243  | 27095  | 4  |
| H11_HUMAN   | 56   | 21829  | 1  |
| THOC4_HUMAN | 237  | 26872  | 3  |
| M2OM_HUMAN  | 236  | 34211  | 4  |
| RAB5C_HUMAN | 226  | 23696  | 3  |
| RAB5A_HUMAN | 141  | 23872  | 2  |

|             |     |       |   |
|-------------|-----|-------|---|
| NSA2_HUMAN  | 226 | 30218 | 6 |
| EF1B_HUMAN  | 220 | 24919 | 2 |
| PNO1_HUMAN  | 215 | 28078 | 3 |
| UTP11_HUMAN | 213 | 30485 | 4 |
| GSTM3_HUMAN | 205 | 26998 | 5 |
| RSSA_HUMAN  | 200 | 32947 | 4 |
| PSA5_HUMAN  | 199 | 26565 | 3 |
| F207A_HUMAN | 197 | 25441 | 4 |
| SRSF7_HUMAN | 186 | 27578 | 2 |
| SRSF3_HUMAN | 130 | 19546 | 2 |
| PGAM1_HUMAN | 184 | 28900 | 4 |
| PGAM2_HUMAN | 42  | 28919 | 1 |
| SPEE_HUMAN  | 182 | 34373 | 5 |
| BOREA_HUMAN | 182 | 31418 | 4 |
| TXTP_HUMAN  | 174 | 34333 | 6 |
| SRPRB_HUMAN | 168 | 29912 | 5 |
| PSA6_HUMAN  | 163 | 27838 | 3 |
| ETFB_HUMAN  | 157 | 28054 | 5 |
| RFA2_HUMAN  | 155 | 29342 | 4 |
| RU2B_HUMAN  | 154 | 25470 | 2 |
| SNRPA_HUMAN | 86  | 31259 | 1 |
| CAH2_HUMAN  | 151 | 29285 | 4 |
| GDIR1_HUMAN | 150 | 23250 | 2 |
| PSA7_HUMAN  | 150 | 28041 | 3 |
| PSA7L_HUMAN | 96  | 28683 | 1 |
| SRSF2_HUMAN | 147 | 25461 | 1 |
| PNPH_HUMAN  | 143 | 32325 | 5 |
| DPM1_HUMAN  | 142 | 29673 | 4 |
| GAR1_HUMAN  | 139 | 22505 | 3 |
| HMGB2_HUMAN | 136 | 24190 | 2 |
| HMGB1_HUMAN | 121 | 25049 | 2 |
| HGB1A_HUMAN | 92  | 24394 | 1 |
| HMGB3_HUMAN | 53  | 23137 | 1 |
| RL10_HUMAN  | 127 | 25044 | 2 |
| DHB11_HUMAN | 123 | 33257 | 4 |
| GDIR2_HUMAN | 120 | 23031 | 3 |
| GHC1_HUMAN  | 119 | 34904 | 3 |
| PSA3_HUMAN  | 118 | 28643 | 2 |
| SARNP_HUMAN | 117 | 23713 | 3 |
| PSA4_HUMAN  | 109 | 29750 | 2 |
| IF4H_HUMAN  | 108 | 27425 | 1 |
| DNJB6_HUMAN | 107 | 36122 | 2 |
| DNJB3_HUMAN | 66  | 16719 | 1 |
| PA1B3_HUMAN | 105 | 25832 | 1 |
| RPP30_HUMAN | 104 | 29702 | 4 |
| RANG_HUMAN  | 103 | 23467 | 1 |
| TPIS_HUMAN  | 103 | 31057 | 5 |
| ERP29_HUMAN | 99  | 29032 | 2 |
| C1QBP_HUMAN | 97  | 31742 | 3 |
| CYBP_HUMAN  | 95  | 26308 | 4 |
| NUDT5_HUMAN | 95  | 24597 | 4 |
| ANXA5_HUMAN | 93  | 35971 | 2 |
| DIC_HUMAN   | 93  | 31718 | 2 |
| BDH_HUMAN   | 92  | 38532 | 4 |
| AN32B_HUMAN | 91  | 28941 | 3 |
| AN32A_HUMAN | 63  | 28682 | 2 |
| AN32C_HUMAN | 30  | 26917 | 1 |
| GSTO1_HUMAN | 91  | 27833 | 3 |
| MYL6B_HUMAN | 87  | 22864 | 1 |
| RAB14_HUMAN | 86  | 24110 | 4 |
| RAB6A_HUMAN | 56  | 23692 | 2 |
| RAB10_HUMAN | 56  | 22755 | 1 |
| SNP23_HUMAN | 86  | 23682 | 2 |
| PSMD8_HUMAN | 82  | 39872 | 2 |
| RAB34_HUMAN | 82  | 29482 | 3 |
| LRC59_HUMAN | 81  | 35308 | 1 |

|             |    |        |   |
|-------------|----|--------|---|
| DCK_HUMAN   | 80 | 30841  | 2 |
| RRP36_HUMAN | 78 | 29862  | 2 |
| CENPP_HUMAN | 77 | 33429  | 2 |
| SC22B_HUMAN | 77 | 24806  | 1 |
| PSA1_HUMAN  | 77 | 29822  | 2 |
| RL24_HUMAN  | 74 | 17882  | 2 |
| FRG1_HUMAN  | 74 | 29439  | 2 |
| PA1B2_HUMAN | 74 | 25724  | 2 |
| ETFPA_HUMAN | 74 | 35400  | 5 |
| NUBP2_HUMAN | 73 | 29206  | 2 |
| ZNF22_HUMAN | 69 | 26583  | 1 |
| EXOS2_HUMAN | 69 | 32996  | 2 |
| COMT_HUMAN  | 67 | 30474  | 2 |
| PSME1_HUMAN | 66 | 28876  | 3 |
| TMA16_HUMAN | 66 | 24078  | 1 |
| GRB2_HUMAN  | 63 | 25304  | 2 |
| PSME3_HUMAN | 63 | 29602  | 2 |
| GNL1_HUMAN  | 63 | 69132  | 1 |
| ECE2_HUMAN  | 62 | 100509 | 1 |
| RT34_HUMAN  | 62 | 25692  | 1 |
| PDC10_HUMAN | 59 | 24686  | 2 |
| IDI1_HUMAN  | 58 | 26645  | 2 |
| RT02_HUMAN  | 58 | 33513  | 1 |
| DCXR_HUMAN  | 56 | 26182  | 1 |
| MEMO1_HUMAN | 56 | 34111  | 2 |
| EXOS6_HUMAN | 55 | 28503  | 2 |
| EXOS4_HUMAN | 55 | 26652  | 2 |
| RPAB1_HUMAN | 54 | 24650  | 2 |
| FBSP1_HUMAN | 53 | 31183  | 1 |
| MTCH2_HUMAN | 52 | 33936  | 1 |
| PGAM5_HUMAN | 49 | 32213  | 2 |
| NOL7_HUMAN  | 48 | 29466  | 1 |
| CDK2_HUMAN  | 48 | 34079  | 1 |
| CN166_HUMAN | 48 | 28165  | 3 |
| SPF30_HUMAN | 48 | 26866  | 1 |
| ML12A_HUMAN | 47 | 19839  | 1 |
| NIT2_HUMAN  | 45 | 30988  | 4 |
| GSTM1_HUMAN | 45 | 25923  | 2 |
| RT07_HUMAN  | 45 | 28230  | 3 |
| VWA8_HUMAN  | 44 | 215716 | 1 |
| SPRE_HUMAN  | 43 | 28316  | 1 |
| NDUS3_HUMAN | 42 | 30337  | 2 |
| RB27A_HUMAN | 42 | 25137  | 1 |
| 6PGL_HUMAN  | 42 | 27815  | 3 |
| COPE_HUMAN  | 42 | 34688  | 2 |
| RS4Y1_HUMAN | 40 | 29665  | 1 |
| PPIA_HUMAN  | 40 | 18229  | 1 |
| LGUL_HUMAN  | 39 | 20992  | 1 |
| RM01_HUMAN  | 38 | 37113  | 2 |
| SUMF2_HUMAN | 38 | 33936  | 2 |
| RSU1_HUMAN  | 37 | 31521  | 1 |
| CC71L_HUMAN | 36 | 26473  | 2 |
| KAD2_HUMAN  | 35 | 26689  | 1 |
| COQ5_HUMAN  | 35 | 37402  | 2 |
| RL22_HUMAN  | 34 | 14835  | 1 |
| DECR_HUMAN  | 33 | 36330  | 1 |
| RL27A_HUMAN | 32 | 16665  | 2 |
| GRIA3_HUMAN | 32 | 101662 | 1 |
| NIPS1_HUMAN | 31 | 33460  | 2 |
| LIMS1_HUMAN | 30 | 39108  | 1 |
| RL17_HUMAN  | 30 | 21611  | 1 |
| TPC_HUMAN   | 29 | 35887  | 2 |
| PSME2_HUMAN | 28 | 27555  | 1 |
| NC2A_HUMAN  | 28 | 22450  | 1 |
| PSMG1_HUMAN | 27 | 33631  | 1 |
| CDK4_HUMAN  | 27 | 33936  | 1 |

|             |     |       |   |
|-------------|-----|-------|---|
| MTHSD_HUMAN | 27  | 42488 | 1 |
| T2FB_HUMAN  | 26  | 28420 | 1 |
| RBM7_HUMAN  | 26  | 30485 | 2 |
| CENPQ_HUMAN | 24  | 30633 | 1 |
| ZCCHL_HUMAN | 24  | 33967 | 1 |
| SERPH_HUMAN | 23  | 46525 | 1 |
| MP2K1_HUMAN | 22  | 43753 | 1 |
| PRS10_HUMAN | 22  | 44430 | 1 |
| WDR74_HUMAN | 20  | 42985 | 1 |
| MCAT_HUMAN  | 20  | 33264 | 1 |
| H2AV_HUMAN  | 18  | 13501 | 1 |
| TAM41_HUMAN | 16  | 51946 | 1 |
| MYL9_HUMAN  | 48  | 19871 | 1 |
| MYL1_HUMAN  | 99  | 21189 | 1 |
| H2A2B_HUMAN | 189 | 13987 | 1 |
| H90B4_HUMAN | 35  | 58855 | 1 |
| RL15_HUMAN  | 364 | 24245 | 1 |
| RL30_HUMAN  | 363 | 12947 | 2 |
| PROF1_HUMAN | 297 | 15216 | 3 |
| RL37A_HUMAN | 280 | 10497 | 1 |
| RL21_HUMAN  | 239 | 18610 | 1 |
| RS15A_HUMAN | 237 | 14944 | 2 |
| RLA2_HUMAN  | 224 | 11658 | 4 |
| H3C_HUMAN   | 207 | 15318 | 2 |
| MIF_HUMAN   | 206 | 12639 | 2 |
| RS16_HUMAN  | 202 | 16549 | 3 |
| RL38_HUMAN  | 194 | 8270  | 2 |
| PEBB_HUMAN  | 190 | 21723 | 1 |
| RS9_HUMAN   | 183 | 22635 | 3 |
| RS14_HUMAN  | 160 | 16434 | 2 |
| PRDX1_HUMAN | 143 | 22324 | 3 |
| PRDX2_HUMAN | 56  | 22049 | 1 |
| APT_HUMAN   | 142 | 19766 | 2 |
| RL12_HUMAN  | 139 | 17979 | 1 |
| PPAC_HUMAN  | 137 | 18487 | 3 |
| NH2L1_HUMAN | 133 | 14393 | 2 |
| HINT1_HUMAN | 123 | 13907 | 1 |
| RL23A_HUMAN | 123 | 17684 | 1 |
| RL18A_HUMAN | 120 | 21034 | 1 |
| RL9_HUMAN   | 120 | 21964 | 1 |
| THIO_HUMAN  | 115 | 12015 | 1 |
| SMD1_HUMAN  | 111 | 13273 | 3 |
| ATPO_HUMAN  | 110 | 23377 | 1 |
| RS20_HUMAN  | 106 | 13478 | 1 |
| USMG5_HUMAN | 102 | 6510  | 1 |
| TEBP_HUMAN  | 100 | 18971 | 1 |
| RS25_HUMAN  | 97  | 13791 | 2 |
| CBX3_HUMAN  | 95  | 20969 | 1 |
| RL27_HUMAN  | 94  | 15788 | 2 |
| R13P3_HUMAN | 92  | 12184 | 1 |
| RL23_HUMAN  | 89  | 14970 | 2 |
| CALM_HUMAN  | 84  | 16827 | 3 |
| PDCD6_HUMAN | 83  | 21912 | 1 |
| RS13_HUMAN  | 83  | 17212 | 1 |
| EIF3K_HUMAN | 77  | 25329 | 1 |
| CIRBP_HUMAN | 75  | 18637 | 1 |
| ARL2_HUMAN  | 75  | 21036 | 1 |
| FABP5_HUMAN | 74  | 15497 | 1 |
| SAR1A_HUMAN | 72  | 22467 | 1 |
| ABHEB_HUMAN | 71  | 22446 | 1 |
| SELH_HUMAN  | 68  | 13503 | 1 |
| PRDX5_HUMAN | 64  | 22301 | 1 |
| RBM8A_HUMAN | 60  | 19934 | 1 |
| NUDC_HUMAN  | 60  | 38276 | 1 |
| RS19_HUMAN  | 59  | 16051 | 1 |
| HBA_HUMAN   | 53  | 15305 | 2 |



|             |    |        |   |
|-------------|----|--------|---|
| ERH_HUMAN   | 51 | 12422  | 1 |
| SPT4H_HUMAN | 51 | 13470  | 1 |
| UB2D2_HUMAN | 48 | 16953  | 1 |
| HMGA1_HUMAN | 45 | 11669  | 1 |
| RAB18_HUMAN | 45 | 23248  | 1 |
| KCY_HUMAN   | 45 | 22436  | 1 |
| TCP4_HUMAN  | 45 | 14386  | 2 |
| SRP09_HUMAN | 41 | 10219  | 1 |
| RS18_HUMAN  | 38 | 17708  | 1 |
| RAP1B_HUMAN | 38 | 21040  | 1 |
| MIP18_HUMAN | 38 | 17766  | 1 |
| RAB2A_HUMAN | 38 | 23702  | 1 |
| TR112_HUMAN | 36 | 14304  | 1 |
| UBE2N_HUMAN | 33 | 17184  | 1 |
| CYTB_HUMAN  | 32 | 11190  | 1 |
| RS24_HUMAN  | 31 | 15413  | 1 |
| BIRC5_HUMAN | 30 | 16720  | 1 |
| CBX1_HUMAN  | 29 | 21519  | 1 |
| DEST_HUMAN  | 29 | 18950  | 1 |
| CX6B1_HUMAN | 28 | 10414  | 1 |
| IMP3_HUMAN  | 23 | 21951  | 1 |
| SMD3_HUMAN  | 23 | 14021  | 1 |
| TCAF1_HUMAN | 23 | 103144 | 1 |
| NOP16_HUMAN | 22 | 21232  | 1 |
| KLOTB_HUMAN | 21 | 120473 | 1 |

---

**Table S1. Identification procedures of HHT specific binding proteins detected by ESI-Q-TOF MS/MS.**

| <b>removed proteins because only one significant peptide that was detected in each protein (691 proteins)</b> |                   |                  |                           |
|---------------------------------------------------------------------------------------------------------------|-------------------|------------------|---------------------------|
| <b>prot_acc</b>                                                                                               | <b>prot_score</b> | <b>prot_mass</b> | <b>prot_sequences_sig</b> |
| PRS4_HUMAN                                                                                                    | 259               | 49325            | 1                         |
| TBA3E_HUMAN                                                                                                   | 728               | 50568            | 1                         |
| TBA1C_HUMAN                                                                                                   | 359               | 50548            | 1                         |
| NP1L1_HUMAN                                                                                                   | 488               | 45631            | 1                         |
| UN45A_HUMAN                                                                                                   | 84                | 104266           | 1                         |
| K1H1_HUMAN                                                                                                    | 315               | 48633            | 1                         |
| ODP2_HUMAN                                                                                                    | 181               | 69466            | 1                         |
| SYFB_HUMAN                                                                                                    | 112               | 66701            | 1                         |
| XPP1_HUMAN                                                                                                    | 51                | 70558            | 1                         |
| RCOR1_HUMAN                                                                                                   | 110               | 53110            | 1                         |
| ECH1_HUMAN                                                                                                    | 334               | 36136            | 1                         |
| SF3A1_HUMAN                                                                                                   | 41                | 88888            | 1                         |
| K2C6B_HUMAN                                                                                                   | 295               | 60315            | 1                         |
| KT33A_HUMAN                                                                                                   | 285               | 47166            | 1                         |
| TBB8_HUMAN                                                                                                    | 182               | 50257            | 1                         |
| ARAF_HUMAN                                                                                                    | 166               | 68341            | 1                         |
| AIFM1_HUMAN                                                                                                   | 135               | 67144            | 1                         |
| POC5_HUMAN                                                                                                    | 104               | 63711            | 1                         |
| SRPR_HUMAN                                                                                                    | 79                | 70223            | 1                         |
| LRC40_HUMAN                                                                                                   | 64                | 68720            | 1                         |
| DESP_HUMAN                                                                                                    | 57                | 334021           | 1                         |
| NXF1_HUMAN                                                                                                    | 54                | 70652            | 1                         |
| SQSTM_HUMAN                                                                                                   | 125               | 48455            | 1                         |
| NUP62_HUMAN                                                                                                   | 73                | 53394            | 1                         |
| NP1L4_HUMAN                                                                                                   | 68                | 42968            | 1                         |
| EGLN_HUMAN                                                                                                    | 78                | 71559            | 1                         |
| KT33B_HUMAN                                                                                                   | 260               | 47325            | 1                         |
| KRT35_HUMAN                                                                                                   | 219               | 51640            | 1                         |
| KRT85_HUMAN                                                                                                   | 139               | 57306            | 1                         |
| SF01_HUMAN                                                                                                    | 107               | 68514            | 1                         |
| PLST_HUMAN                                                                                                    | 102               | 71279            | 1                         |
| SEN3_HUMAN                                                                                                    | 76                | 65596            | 1                         |
| MAGD2_HUMAN                                                                                                   | 63                | 65085            | 1                         |
| T2FA_HUMAN                                                                                                    | 58                | 58262            | 1                         |
| SAMD1_HUMAN                                                                                                   | 30                | 56189            | 1                         |
| KCC2B_HUMAN                                                                                                   | 177               | 73544            | 1                         |
| SDPR_HUMAN                                                                                                    | 110               | 47202            | 1                         |
| EED_HUMAN                                                                                                     | 76                | 50907            | 1                         |
| CAP1_HUMAN                                                                                                    | 67                | 52325            | 1                         |
| BGAL_HUMAN                                                                                                    | 61                | 76483            | 1                         |
| STT3A_HUMAN                                                                                                   | 23                | 81104            | 1                         |
| CEP89_HUMAN                                                                                                   | 120               | 89934            | 1                         |
| CDC5L_HUMAN                                                                                                   | 62                | 92422            | 1                         |
| RAD21_HUMAN                                                                                                   | 55                | 71930            | 1                         |
| SAE2_HUMAN                                                                                                    | 36                | 71749            | 1                         |
| RAGP1_HUMAN                                                                                                   | 28                | 63958            | 1                         |
| SC24C_HUMAN                                                                                                   | 27                | 119789           | 1                         |
| HSP77_HUMAN                                                                                                   | 279               | 40448            | 1                         |
| K2C72_HUMAN                                                                                                   | 45                | 56470            | 1                         |
| K2C7_HUMAN                                                                                                    | 161               | 51411            | 1                         |
| PYRG2_HUMAN                                                                                                   | 99                | 66320            | 1                         |
| PCKGC_HUMAN                                                                                                   | 49                | 69948            | 1                         |
| MTA3_HUMAN                                                                                                    | 45                | 68202            | 1                         |
| KRT36_HUMAN                                                                                                   | 101               | 53354            | 1                         |
| K1H2_HUMAN                                                                                                    | 194               | 51793            | 1                         |
| KRT82_HUMAN                                                                                                   | 98                | 57985            | 1                         |
| PLSL_HUMAN                                                                                                    | 64                | 70814            | 1                         |
| ZWILC_HUMAN                                                                                                   | 100               | 67685            | 1                         |
| CBX2_HUMAN                                                                                                    | 58                | 56388            | 1                         |
| SNX1_HUMAN                                                                                                    | 55                | 59147            | 1                         |
| CTBL1_HUMAN                                                                                                   | 53                | 65588            | 1                         |
| ANM3_HUMAN                                                                                                    | 44                | 60522            | 1                         |
| 2A5D_HUMAN                                                                                                    | 49                | 70289            | 1                         |
| SMCA2_HUMAN                                                                                                   | 42                | 181794           | 1                         |
| SNX2_HUMAN                                                                                                    | 39                | 58549            | 1                         |
| CBX4_HUMAN                                                                                                    | 36                | 61672            | 1                         |

|             |     |        |   |
|-------------|-----|--------|---|
| FIP1_HUMAN  | 34  | 66601  | 1 |
| TOM70_HUMAN | 32  | 68096  | 1 |
| SWP70_HUMAN | 29  | 69354  | 1 |
| CDCA2_HUMAN | 28  | 114146 | 1 |
| P66A_HUMAN  | 26  | 68363  | 1 |
| KCC2A_HUMAN | 108 | 54624  | 1 |
| COR1B_HUMAN | 82  | 54885  | 1 |
| SAAL1_HUMAN | 43  | 54436  | 1 |
| ZC3HF_HUMAN | 38  | 48972  | 1 |
| CLPB_HUMAN  | 32  | 79193  | 1 |
| CENPU_HUMAN | 30  | 47721  | 1 |
| WASP_HUMAN  | 29  | 53108  | 1 |
| G3BP2_HUMAN | 29  | 54145  | 1 |
| ACADS_HUMAN | 67  | 44611  | 1 |
| ABC3G_HUMAN | 56  | 47233  | 1 |
| M4K4_HUMAN  | 45  | 142754 | 1 |
| DNJA3_HUMAN | 35  | 53083  | 1 |
| K1C16_HUMAN | 138 | 51578  | 1 |
| HPRT_HUMAN  | 108 | 24792  | 1 |
| CSK2B_HUMAN | 70  | 25268  | 1 |
| LSM12_HUMAN | 43  | 21972  | 1 |
| GET4_HUMAN  | 42  | 36709  | 1 |
| NUDT8_HUMAN | 35  | 25753  | 1 |
| MCU_HUMAN   | 28  | 40127  | 1 |
| GSTP1_HUMAN | 24  | 23569  | 1 |
| SPTB1_HUMAN | 60  | 247171 | 1 |
| MYO1D_HUMAN | 35  | 116927 | 1 |
| MYO1B_HUMAN | 90  | 132928 | 1 |
| IPO8_HUMAN  | 87  | 120945 | 1 |
| NEB1_HUMAN  | 79  | 123552 | 1 |
| CB072_HUMAN | 30  | 30918  | 1 |
| MYO5B_HUMAN | 44  | 215135 | 1 |
| MYO5C_HUMAN | 39  | 203994 | 1 |
| AT2A3_HUMAN | 114 | 115444 | 1 |
| CROL2_HUMAN | 31  | 33656  | 1 |
| HXK3_HUMAN  | 47  | 100616 | 1 |
| PSAL_HUMAN  | 26  | 54226  | 1 |
| SYNE3_HUMAN | 84  | 112774 | 1 |
| PTPRC_HUMAN | 68  | 148644 | 1 |
| NOL8_HUMAN  | 66  | 132448 | 1 |
| RPA2_HUMAN  | 57  | 129799 | 1 |
| RNBP6_HUMAN | 24  | 126173 | 1 |
| OSBL8_HUMAN | 54  | 101759 | 1 |
| DHX37_HUMAN | 54  | 130547 | 1 |
| EXOC4_HUMAN | 52  | 111170 | 1 |
| DCTN1_HUMAN | 51  | 142348 | 1 |
| RPOM_HUMAN  | 50  | 140300 | 1 |
| CE192_HUMAN | 50  | 215180 | 1 |
| PTSS1_HUMAN | 49  | 56175  | 1 |
| SRGP1_HUMAN | 49  | 125099 | 1 |
| VAV3_HUMAN  | 26  | 99082  | 1 |
| RPTOR_HUMAN | 48  | 150653 | 1 |
| SON_HUMAN   | 46  | 264063 | 1 |
| CE120_HUMAN | 45  | 113198 | 1 |
| FILA2_HUMAN | 45  | 249296 | 1 |
| BRD1_HUMAN  | 44  | 121554 | 1 |
| TTLL7_HUMAN | 43  | 103846 | 1 |
| PCM1_HUMAN  | 43  | 230046 | 1 |
| IREB2_HUMAN | 42  | 106004 | 1 |
| SPTA3_HUMAN | 41  | 21572  | 1 |
| SMRC2_HUMAN | 40  | 133196 | 1 |
| MMS19_HUMAN | 40  | 114928 | 1 |
| KIF14_HUMAN | 37  | 187743 | 1 |
| TCRG1_HUMAN | 37  | 124051 | 1 |
| SSH1_HUMAN  | 36  | 116465 | 1 |
| SPICE_HUMAN | 36  | 96548  | 1 |
| RRS1_HUMAN  | 36  | 41225  | 1 |
| CYFP1_HUMAN | 35  | 146742 | 1 |
| KIF11_HUMAN | 35  | 120111 | 1 |
| PHF14_HUMAN | 34  | 101815 | 1 |

|             |    |        |   |
|-------------|----|--------|---|
| KRI1_HUMAN  | 34 | 83004  | 1 |
| MYADM_HUMAN | 34 | 36049  | 1 |
| WRN_HUMAN   | 33 | 164410 | 1 |
| NU160_HUMAN | 33 | 164355 | 1 |
| NXN_HUMAN   | 33 | 48761  | 1 |
| DREB_HUMAN  | 33 | 71842  | 1 |
| IPO11_HUMAN | 32 | 113489 | 1 |
| FANCI_HUMAN | 31 | 150769 | 1 |
| IDE_HUMAN   | 30 | 118692 | 1 |
| MAP1S_HUMAN | 30 | 113111 | 1 |
| VIGLN_HUMAN | 29 | 141995 | 1 |
| YS043_HUMAN | 28 | 23372  | 1 |
| CKAP5_HUMAN | 28 | 227062 | 1 |
| BAZ1A_HUMAN | 27 | 180246 | 1 |
| DGKZ_HUMAN  | 27 | 125704 | 1 |
| XPO7_HUMAN  | 27 | 125196 | 1 |
| USO1_HUMAN  | 27 | 108740 | 1 |
| WAPL_HUMAN  | 26 | 134516 | 1 |
| CWC22_HUMAN | 26 | 105972 | 1 |
| NCKPL_HUMAN | 26 | 129554 | 1 |
| PI4KA_HUMAN | 25 | 233622 | 1 |
| STRUM_HUMAN | 25 | 135113 | 1 |
| LBR_HUMAN   | 25 | 71057  | 1 |
| VIP2_HUMAN  | 24 | 141573 | 1 |
| JCAD_HUMAN  | 24 | 149343 | 1 |
| LUZP1_HUMAN | 24 | 120772 | 1 |
| CTNB1_HUMAN | 24 | 86069  | 1 |
| ITB1_HUMAN  | 23 | 91664  | 1 |
| VTA1_HUMAN  | 23 | 34143  | 1 |
| AL2SB_HUMAN | 22 | 52748  | 1 |
| RN213_HUMAN | 22 | 598557 | 1 |
| K1875_HUMAN | 22 | 182416 | 1 |
| USP9X_HUMAN | 22 | 295515 | 1 |
| CD34_HUMAN  | 21 | 41091  | 1 |
| E41L2_HUMAN | 21 | 113032 | 1 |
| PRDM1_HUMAN | 20 | 92966  | 1 |
| HXK1_HUMAN  | 20 | 103561 | 1 |
| DEUP1_HUMAN | 20 | 71503  | 1 |
| SMCA4_HUMAN | 20 | 185100 | 1 |
| STT3B_HUMAN | 20 | 94241  | 1 |
| S2548_HUMAN | 19 | 33817  | 1 |
| MFN2_HUMAN  | 19 | 87088  | 1 |
| APC_HUMAN   | 19 | 313622 | 1 |
| OIT3_HUMAN  | 18 | 62206  | 1 |
| CC151_HUMAN | 18 | 69268  | 1 |
| AT12A_HUMAN | 18 | 116292 | 1 |
| CHSS1_HUMAN | 17 | 92353  | 1 |
| AMPN_HUMAN  | 17 | 109870 | 1 |
| UBR5_HUMAN  | 17 | 312352 | 1 |
| ATRX_HUMAN  | 17 | 284863 | 1 |
| PTRF_HUMAN  | 16 | 43450  | 1 |
| LRFN5_HUMAN | 16 | 80421  | 1 |
| PAK2_HUMAN  | 16 | 58291  | 1 |
| TAOK2_HUMAN | 16 | 138964 | 1 |
| SMG7_HUMAN  | 16 | 127886 | 1 |
| TRIPB_HUMAN | 15 | 228131 | 1 |
| TTL13_HUMAN | 15 | 94954  | 1 |
| SYTC2_HUMAN | 98 | 93613  | 1 |
| GYS2_HUMAN  | 95 | 81565  | 1 |
| KS6A5_HUMAN | 46 | 90379  | 1 |
| RFTN1_HUMAN | 89 | 63677  | 1 |
| GMEB1_HUMAN | 48 | 62894  | 1 |
| EI2BE_HUMAN | 68 | 81071  | 1 |
| CIP2A_HUMAN | 66 | 103318 | 1 |
| NUP88_HUMAN | 54 | 84629  | 1 |
| SYCC_HUMAN  | 41 | 86103  | 1 |
| AGAP2_HUMAN | 37 | 125396 | 1 |
| PRC2B_HUMAN | 36 | 243958 | 1 |
| IFT74_HUMAN | 36 | 69310  | 1 |
| KI2L2_HUMAN | 35 | 38961  | 1 |

|             |    |        |   |
|-------------|----|--------|---|
| ROCK2_HUMAN | 35 | 161939 | 1 |
| P3H1_HUMAN  | 33 | 84196  | 1 |
| AGO1_HUMAN  | 32 | 98293  | 1 |
| PDXD1_HUMAN | 32 | 87565  | 1 |
| OS9_HUMAN   | 32 | 75971  | 1 |
| AP1G2_HUMAN | 31 | 87917  | 1 |
| AAR2_HUMAN  | 30 | 43843  | 1 |
| TGFA1_HUMAN | 28 | 98236  | 1 |
| APC4_HUMAN  | 27 | 92856  | 1 |
| VINC_HUMAN  | 27 | 124292 | 1 |
| NAA15_HUMAN | 26 | 102462 | 1 |
| RIN1_HUMAN  | 25 | 84902  | 1 |
| PLOD3_HUMAN | 25 | 85302  | 1 |
| TPRN_HUMAN  | 25 | 75795  | 1 |
| Z280C_HUMAN | 24 | 84867  | 1 |
| ACOC_HUMAN  | 24 | 98850  | 1 |
| NEK9_HUMAN  | 24 | 108868 | 1 |
| EPG5_HUMAN  | 23 | 295201 | 1 |
| PANK4_HUMAN | 23 | 86621  | 1 |
| RUFY1_HUMAN | 23 | 80851  | 1 |
| VILI_HUMAN  | 22 | 93093  | 1 |
| PRIC3_HUMAN | 22 | 70789  | 1 |
| SYF1_HUMAN  | 22 | 100745 | 1 |
| PIBF1_HUMAN | 22 | 90035  | 1 |
| CQ085_HUMAN | 21 | 70663  | 1 |
| C2C4A_HUMAN | 21 | 40346  | 1 |
| MARK2_HUMAN | 20 | 88255  | 1 |
| CACO1_HUMAN | 20 | 77745  | 1 |
| ACAP2_HUMAN | 20 | 88943  | 1 |
| NR3L1_HUMAN | 20 | 51536  | 1 |
| F179B_HUMAN | 20 | 190611 | 1 |
| AFAD_HUMAN  | 19 | 207702 | 1 |
| SCLT1_HUMAN | 19 | 81203  | 1 |
| UBP5_HUMAN  | 18 | 96638  | 1 |
| PI3R4_HUMAN | 18 | 154318 | 1 |
| CP2CJ_HUMAN | 18 | 56636  | 1 |
| ACADV_HUMAN | 18 | 70745  | 1 |
| LRRK2_HUMAN | 18 | 289568 | 1 |
| HEY2_HUMAN  | 17 | 36071  | 1 |
| ZSC30_HUMAN | 17 | 57469  | 1 |
| F91A1_HUMAN | 17 | 94648  | 1 |
| MIO_HUMAN   | 17 | 100232 | 1 |
| PLCL1_HUMAN | 17 | 124360 | 1 |
| MYH7_HUMAN  | 16 | 223757 | 1 |
| SCRN3_HUMAN | 16 | 48969  | 1 |
| COBL_HUMAN  | 16 | 136446 | 1 |
| LAR4B_HUMAN | 15 | 80902  | 1 |
| IQCE_HUMAN  | 15 | 77649  | 1 |
| K2C71_HUMAN | 21 | 57769  | 1 |
| PAP1M_HUMAN | 96 | 22956  | 1 |
| K1C40_HUMAN | 83 | 50046  | 1 |
| LRRK1_HUMAN | 28 | 228385 | 1 |
| BRAF_HUMAN  | 84 | 85125  | 1 |
| KRT81_HUMAN | 87 | 56832  | 1 |
| PLSI_HUMAN  | 41 | 70608  | 1 |
| MBD4_HUMAN  | 96 | 66808  | 1 |
| PPR18_HUMAN | 78 | 68187  | 1 |
| MERL_HUMAN  | 65 | 69874  | 1 |
| MAGD1_HUMAN | 24 | 86221  | 1 |
| PPM1G_HUMAN | 58 | 59919  | 1 |
| HABP2_HUMAN | 26 | 64740  | 1 |
| STAT6_HUMAN | 55 | 94816  | 1 |
| PGM2_HUMAN  | 53 | 68754  | 1 |
| LRC15_HUMAN | 52 | 65238  | 1 |
| NCDN_HUMAN  | 50 | 80239  | 1 |
| KIF2A_HUMAN | 50 | 80589  | 1 |
| ZDH16_HUMAN | 48 | 44574  | 1 |
| STK39_HUMAN | 48 | 59950  | 1 |
| GUF1_HUMAN  | 48 | 74737  | 1 |
| UBS3B_HUMAN | 48 | 73790  | 1 |

|             |    |        |   |
|-------------|----|--------|---|
| FAKD5_HUMAN | 47 | 87488  | 1 |
| KR87P_HUMAN | 47 | 29555  | 1 |
| PTPRG_HUMAN | 46 | 163042 | 1 |
| PRC1_HUMAN  | 46 | 72246  | 1 |
| RBBP5_HUMAN | 41 | 59800  | 1 |
| CPSF3_HUMAN | 41 | 78120  | 1 |
| CHD7_HUMAN  | 41 | 337542 | 1 |
| CAF1B_HUMAN | 40 | 61910  | 1 |
| PGH1_HUMAN  | 39 | 69383  | 1 |
| FACD2_HUMAN | 39 | 165792 | 1 |
| BRAT1_HUMAN | 39 | 89774  | 1 |
| NADE_HUMAN  | 36 | 80545  | 1 |
| LYRIC_HUMAN | 36 | 63856  | 1 |
| PALM_HUMAN  | 35 | 42221  | 1 |
| ASML_HUMAN  | 34 | 69554  | 1 |
| VIP1_HUMAN  | 34 | 161245 | 1 |
| PRP17_HUMAN | 33 | 66164  | 1 |
| GLCNE_HUMAN | 33 | 80193  | 1 |
| ASH2L_HUMAN | 33 | 69307  | 1 |
| ECHP_HUMAN  | 32 | 80072  | 1 |
| AP3B1_HUMAN | 32 | 121815 | 1 |
| NRBP_HUMAN  | 32 | 60377  | 1 |
| HCLS1_HUMAN | 31 | 54095  | 1 |
| ECHB_HUMAN  | 31 | 51547  | 1 |
| IRAK1_HUMAN | 31 | 77458  | 1 |
| ATG7_HUMAN  | 30 | 79050  | 1 |
| ERCC2_HUMAN | 29 | 87652  | 1 |
| NPL4_HUMAN  | 28 | 69046  | 1 |
| WDR76_HUMAN | 28 | 70466  | 1 |
| TAP1_HUMAN  | 27 | 87733  | 1 |
| IQCB1_HUMAN | 27 | 69342  | 1 |
| TNIP1_HUMAN | 26 | 72105  | 1 |
| SCRB1_HUMAN | 26 | 61636  | 1 |
| ERLEC_HUMAN | 25 | 55679  | 1 |
| ASZ1_HUMAN  | 25 | 53938  | 1 |
| DSG4_HUMAN  | 24 | 115462 | 1 |
| MCE1_HUMAN  | 24 | 69425  | 1 |
| UBQL2_HUMAN | 24 | 65655  | 1 |
| VGLU3_HUMAN | 24 | 65861  | 1 |
| SATB2_HUMAN | 24 | 83017  | 1 |
| WDR26_HUMAN | 24 | 73048  | 1 |
| FHOD1_HUMAN | 22 | 127328 | 1 |
| DDX4_HUMAN  | 22 | 80113  | 1 |
| HAUS3_HUMAN | 21 | 70006  | 1 |
| ZSWM5_HUMAN | 21 | 132318 | 1 |
| SYTM_HUMAN  | 21 | 81841  | 1 |
| CSMD3_HUMAN | 20 | 414007 | 1 |
| THOC5_HUMAN | 20 | 79199  | 1 |
| PLCH2_HUMAN | 20 | 155940 | 1 |
| DC1I2_HUMAN | 20 | 71811  | 1 |
| TIRAP_HUMAN | 19 | 24267  | 1 |
| SRRM2_HUMAN | 19 | 300179 | 1 |
| KBP_HUMAN   | 19 | 72453  | 1 |
| GTPB2_HUMAN | 19 | 66468  | 1 |
| DSG1_HUMAN  | 19 | 114702 | 1 |
| GALT1_HUMAN | 19 | 65090  | 1 |
| PXK_HUMAN   | 19 | 65479  | 1 |
| LKHA4_HUMAN | 18 | 69868  | 1 |
| TAF6L_HUMAN | 18 | 68342  | 1 |
| PIEZ2_HUMAN | 18 | 320652 | 1 |
| WASF2_HUMAN | 18 | 54478  | 1 |
| HEAT3_HUMAN | 17 | 75789  | 1 |
| KLC1_HUMAN  | 17 | 65782  | 1 |
| CE170_HUMAN | 17 | 175586 | 1 |
| ITAV_HUMAN  | 17 | 117048 | 1 |
| KI26B_HUMAN | 17 | 226481 | 1 |
| TAP2_HUMAN  | 16 | 76186  | 1 |
| SYLM_HUMAN  | 16 | 102823 | 1 |
| NCPR_HUMAN  | 16 | 77097  | 1 |
| NSMA_HUMAN  | 16 | 48128  | 1 |

|             |    |         |   |
|-------------|----|---------|---|
| KIFC1_HUMAN | 16 | 74272   | 1 |
| CENPI_HUMAN | 16 | 87748   | 1 |
| PIDD1_HUMAN | 15 | 100619  | 1 |
| IMA8_HUMAN  | 35 | 57529   | 1 |
| TBL1Y_HUMAN | 26 | 57280   | 1 |
| ARP5_HUMAN  | 43 | 68825   | 1 |
| RIC8B_HUMAN | 28 | 59586   | 1 |
| PTBP2_HUMAN | 27 | 57569   | 1 |
| HCK_HUMAN   | 41 | 60075   | 1 |
| SCOT2_HUMAN | 19 | 56731   | 1 |
| NMT2_HUMAN  | 70 | 57286   | 1 |
| ATLA2_HUMAN | 26 | 66814   | 1 |
| DPYL1_HUMAN | 36 | 62487   | 1 |
| FAKD3_HUMAN | 74 | 76895   | 1 |
| AL4A1_HUMAN | 74 | 62137   | 1 |
| UAP1L_HUMAN | 60 | 57565   | 1 |
| AAPK2_HUMAN | 23 | 62850   | 1 |
| NCOA5_HUMAN | 57 | 65725   | 1 |
| NASP_HUMAN  | 55 | 85471   | 1 |
| LMAN1_HUMAN | 55 | 57798   | 1 |
| PAK1_HUMAN  | 41 | 60894   | 1 |
| GPTC4_HUMAN | 53 | 50579   | 1 |
| ARMC8_HUMAN | 52 | 76601   | 1 |
| STXB3_HUMAN | 50 | 68633   | 1 |
| ARFG2_HUMAN | 49 | 57027   | 1 |
| TBCE_HUMAN  | 48 | 59936   | 1 |
| TYY1_HUMAN  | 48 | 45141   | 1 |
| STK38_HUMAN | 48 | 54498   | 1 |
| PCYXL_HUMAN | 45 | 54783   | 1 |
| KLHL6_HUMAN | 45 | 71340   | 1 |
| ARI1_HUMAN  | 44 | 65900   | 1 |
| SETD3_HUMAN | 44 | 67557   | 1 |
| INO1_HUMAN  | 44 | 61542   | 1 |
| TMX3_HUMAN  | 43 | 52181   | 1 |
| KDEL2_HUMAN | 38 | 58934   | 1 |
| QRIC1_HUMAN | 37 | 86838   | 1 |
| TF3C1_HUMAN | 35 | 241062  | 1 |
| CSN1_HUMAN  | 35 | 56071   | 1 |
| CNGB3_HUMAN | 34 | 92679   | 1 |
| WIPF1_HUMAN | 33 | 51284   | 1 |
| IRF5_HUMAN  | 33 | 56579   | 1 |
| GEMI5_HUMAN | 33 | 170821  | 1 |
| KAPCB_HUMAN | 33 | 40711   | 1 |
| MTMRE_HUMAN | 32 | 73013   | 1 |
| GAPD1_HUMAN | 32 | 166359  | 1 |
| THUM3_HUMAN | 31 | 57765   | 1 |
| PUR1_HUMAN  | 31 | 58161   | 1 |
| SRRT_HUMAN  | 31 | 101060  | 1 |
| VWA9_HUMAN  | 31 | 58004   | 1 |
| VP33A_HUMAN | 30 | 67967   | 1 |
| APOA_HUMAN  | 30 | 514737  | 1 |
| CNOT2_HUMAN | 30 | 59871   | 1 |
| PIGT_HUMAN  | 29 | 66228   | 1 |
| CO6A1_HUMAN | 29 | 109602  | 1 |
| MOS_HUMAN   | 29 | 38366   | 1 |
| TFCP2_HUMAN | 28 | 57676   | 1 |
| PRI2_HUMAN  | 27 | 59225   | 1 |
| CTR9_HUMAN  | 27 | 134332  | 1 |
| SYPL1_HUMAN | 27 | 28889   | 1 |
| ZN207_HUMAN | 27 | 51002   | 1 |
| PDCD4_HUMAN | 27 | 52102   | 1 |
| CARM1_HUMAN | 27 | 66382   | 1 |
| CFA57_HUMAN | 26 | 145839  | 1 |
| PIGS_HUMAN  | 26 | 61731   | 1 |
| TF3C5_HUMAN | 26 | 59989   | 1 |
| CDYL1_HUMAN | 24 | 66953   | 1 |
| CEP55_HUMAN | 24 | 54487   | 1 |
| PLRG1_HUMAN | 24 | 57500   | 1 |
| TITIN_HUMAN | 24 | 3842904 | 1 |
| CWC27_HUMAN | 23 | 53985   | 1 |

|             |    |        |   |
|-------------|----|--------|---|
| HACL1_HUMAN | 23 | 64429  | 1 |
| PATZ1_HUMAN | 22 | 75438  | 1 |
| LENG9_HUMAN | 22 | 53818  | 1 |
| AKA11_HUMAN | 21 | 212946 | 1 |
| CCDC6_HUMAN | 21 | 53429  | 1 |
| CD019_HUMAN | 21 | 34234  | 1 |
| FRIL_HUMAN  | 20 | 20064  | 1 |
| TF65_HUMAN  | 20 | 60695  | 1 |
| K2C78_HUMAN | 20 | 57629  | 1 |
| VILL_HUMAN  | 20 | 96418  | 1 |
| CDC73_HUMAN | 20 | 60653  | 1 |
| DPOD3_HUMAN | 18 | 51653  | 1 |
| CTDP1_HUMAN | 18 | 105304 | 1 |
| CO3A1_HUMAN | 18 | 139733 | 1 |
| PLK1_HUMAN  | 17 | 68953  | 1 |
| NUP54_HUMAN | 17 | 55515  | 1 |
| BAIP2_HUMAN | 17 | 61115  | 1 |
| RENT2_HUMAN | 17 | 148972 | 1 |
| UBQL1_HUMAN | 17 | 62479  | 1 |
| RSPRY_HUMAN | 17 | 65450  | 1 |
| DOK1_HUMAN  | 17 | 52815  | 1 |
| TLL4_HUMAN  | 16 | 134606 | 1 |
| RHGBA_HUMAN | 16 | 114879 | 1 |
| MPP8_HUMAN  | 16 | 97636  | 1 |
| TRI56_HUMAN | 16 | 83147  | 1 |
| BEND5_HUMAN | 16 | 48551  | 1 |
| TM131_HUMAN | 15 | 205809 | 1 |
| CDC45_HUMAN | 15 | 66211  | 1 |
| YBOX2_HUMAN | 60 | 38552  | 1 |
| BZW2_HUMAN  | 79 | 48360  | 1 |
| 6PGD_HUMAN  | 87 | 53619  | 1 |
| TBG1_HUMAN  | 64 | 51480  | 1 |
| IF2B_HUMAN  | 54 | 38706  | 1 |
| DDX49_HUMAN | 46 | 54819  | 1 |
| CBX8_HUMAN  | 44 | 43483  | 1 |
| NAMPT_HUMAN | 40 | 55772  | 1 |
| SCMC1_HUMAN | 39 | 53548  | 1 |
| LYAR_HUMAN  | 39 | 44044  | 1 |
| KAP2_HUMAN  | 38 | 45832  | 1 |
| NDUS2_HUMAN | 35 | 52911  | 1 |
| CLC11_HUMAN | 35 | 36015  | 1 |
| SPTC1_HUMAN | 35 | 53281  | 1 |
| AL1B1_HUMAN | 33 | 57626  | 1 |
| ERF1_HUMAN  | 33 | 49228  | 1 |
| KAPCA_HUMAN | 32 | 40678  | 1 |
| OLA1_HUMAN  | 31 | 44943  | 1 |
| PLEK_HUMAN  | 30 | 40499  | 1 |
| CTBP1_HUMAN | 29 | 47962  | 1 |
| GALT8_HUMAN | 29 | 73432  | 1 |
| VASP_HUMAN  | 28 | 39976  | 1 |
| AL7A1_HUMAN | 25 | 59020  | 1 |
| MEP50_HUMAN | 23 | 37442  | 1 |
| ARI5B_HUMAN | 22 | 133433 | 1 |
| CO5_HUMAN   | 22 | 189897 | 1 |
| F111A_HUMAN | 20 | 71007  | 1 |
| SAMD5_HUMAN | 20 | 19390  | 1 |
| DPTOR_HUMAN | 18 | 46777  | 1 |
| PRS7_HUMAN  | 18 | 49002  | 1 |
| DAZP1_HUMAN | 17 | 43584  | 1 |
| TRUA_HUMAN  | 16 | 48010  | 1 |
| NUD14_HUMAN | 16 | 24331  | 1 |
| GNA12_HUMAN | 68 | 44422  | 1 |
| NACP1_HUMAN | 33 | 23292  | 1 |
| CCYL1_HUMAN | 61 | 41250  | 1 |
| DNJB4_HUMAN | 40 | 38011  | 1 |
| ENOB_HUMAN  | 43 | 47299  | 1 |
| AAKG2_HUMAN | 91 | 63198  | 1 |
| DHSO_HUMAN  | 82 | 38927  | 1 |
| ALDR_HUMAN  | 37 | 36230  | 1 |
| PLCE_HUMAN  | 68 | 42387  | 1 |



|             |     |        |   |
|-------------|-----|--------|---|
| RING2_HUMAN | 66  | 38088  | 1 |
| MK08_HUMAN  | 52  | 48835  | 1 |
| MAT2B_HUMAN | 54  | 37870  | 1 |
| MINK1_HUMAN | 42  | 150413 | 1 |
| NDK7_HUMAN  | 44  | 42920  | 1 |
| PP2BA_HUMAN | 43  | 59335  | 1 |
| SPSY_HUMAN  | 43  | 41698  | 1 |
| F10A5_HUMAN | 27  | 41579  | 1 |
| PIHD1_HUMAN | 43  | 32513  | 1 |
| PPID_HUMAN  | 40  | 41137  | 1 |
| RTCA_HUMAN  | 37  | 39825  | 1 |
| RUSD3_HUMAN | 37  | 38779  | 1 |
| ADA23_HUMAN | 32  | 94433  | 1 |
| RAE1L_HUMAN | 31  | 41569  | 1 |
| IGBP1_HUMAN | 31  | 39312  | 1 |
| KC1G1_HUMAN | 30  | 48937  | 1 |
| CSK22_HUMAN | 30  | 41358  | 1 |
| DCPS_HUMAN  | 30  | 38756  | 1 |
| PPP6_HUMAN  | 30  | 35806  | 1 |
| SIAS_HUMAN  | 29  | 40738  | 1 |
| TSR1_HUMAN  | 29  | 92151  | 1 |
| CRKL_HUMAN  | 28  | 33870  | 1 |
| STX17_HUMAN | 28  | 33611  | 1 |
| GIPC1_HUMAN | 28  | 36141  | 1 |
| DYN3_HUMAN  | 27  | 98084  | 1 |
| RYR3_HUMAN  | 28  | 557790 | 1 |
| RM04_HUMAN  | 27  | 34954  | 1 |
| GPD1L_HUMAN | 26  | 39021  | 1 |
| NUBP1_HUMAN | 26  | 35140  | 1 |
| KPRB_HUMAN  | 16  | 41299  | 1 |
| SRSF8_HUMAN | 26  | 32382  | 1 |
| GMD5_HUMAN  | 25  | 42265  | 1 |
| THIC_HUMAN  | 24  | 41838  | 1 |
| RIOK3_HUMAN | 23  | 59511  | 1 |
| SPTN5_HUMAN | 22  | 419230 | 1 |
| HDGF_HUMAN  | 22  | 26886  | 1 |
| PDXK_HUMAN  | 21  | 35308  | 1 |
| PP6R1_HUMAN | 21  | 97291  | 1 |
| N2DL2_HUMAN | 21  | 27863  | 1 |
| ASAH1_HUMAN | 21  | 45087  | 1 |
| BST1_HUMAN  | 21  | 36328  | 1 |
| RM39_HUMAN  | 21  | 39200  | 1 |
| HM13_HUMAN  | 20  | 41747  | 1 |
| PEX16_HUMAN | 20  | 38662  | 1 |
| TAP26_HUMAN | 20  | 28880  | 1 |
| LASP1_HUMAN | 20  | 30097  | 1 |
| FA92B_HUMAN | 20  | 35048  | 1 |
| AT10B_HUMAN | 19  | 167679 | 1 |
| EI2BB_HUMAN | 19  | 39193  | 1 |
| RM44_HUMAN  | 18  | 37854  | 1 |
| CD123_HUMAN | 18  | 39566  | 1 |
| PLIN4_HUMAN | 18  | 135204 | 1 |
| PCY1A_HUMAN | 18  | 42047  | 1 |
| B3GT6_HUMAN | 18  | 37513  | 1 |
| LYSC_HUMAN  | 17  | 16982  | 1 |
| UFD1_HUMAN  | 17  | 34763  | 1 |
| DHCR7_HUMAN | 16  | 55195  | 1 |
| ANR26_HUMAN | 16  | 197400 | 1 |
| RT05_HUMAN  | 16  | 48489  | 1 |
| ADA2B_HUMAN | 15  | 50333  | 1 |
| 1433G_HUMAN | 187 | 28456  | 1 |
| ENOPH_HUMAN | 106 | 29086  | 1 |
| SPC24_HUMAN | 85  | 22521  | 1 |
| MLEC_HUMAN  | 69  | 32385  | 1 |
| CY1_HUMAN   | 67  | 35741  | 1 |
| CC124_HUMAN | 66  | 25820  | 1 |
| RB11A_HUMAN | 61  | 24492  | 1 |
| KITH_HUMAN  | 58  | 26079  | 1 |
| AKIP1_HUMAN | 57  | 23328  | 1 |
| RNH2A_HUMAN | 55  | 33716  | 1 |

|             |    |        |   |
|-------------|----|--------|---|
| FA49B_HUMAN | 51 | 37010  | 1 |
| RCD1_HUMAN  | 50 | 33952  | 1 |
| FAH2A_HUMAN | 48 | 34916  | 1 |
| CLN6_HUMAN  | 46 | 36010  | 1 |
| GNPI2_HUMAN | 18 | 31293  | 1 |
| GSTM5_HUMAN | 36 | 25829  | 1 |
| GSTM2_HUMAN | 30 | 25899  | 1 |
| TFAM_HUMAN  | 44 | 29306  | 1 |
| TSN_HUMAN   | 44 | 26281  | 1 |
| BAG2_HUMAN  | 44 | 23928  | 1 |
| RPIA_HUMAN  | 42 | 33533  | 1 |
| GOLP3_HUMAN | 41 | 34075  | 1 |
| CASPG_HUMAN | 41 | 20447  | 1 |
| F186A_HUMAN | 40 | 262994 | 1 |
| BCL2_HUMAN  | 39 | 26363  | 1 |
| DR4L1_HUMAN | 37 | 30816  | 1 |
| SGMR1_HUMAN | 36 | 25169  | 1 |
| CMBL_HUMAN  | 36 | 28372  | 1 |
| SPF27_HUMAN | 36 | 26229  | 1 |
| PIMT_HUMAN  | 34 | 24792  | 1 |
| CC106_HUMAN | 34 | 32241  | 1 |
| RM45_HUMAN  | 32 | 35613  | 1 |
| RL8_HUMAN   | 32 | 28235  | 1 |
| RAD1_HUMAN  | 32 | 32434  | 1 |
| ZCH10_HUMAN | 31 | 21125  | 1 |
| KANK2_HUMAN | 31 | 91916  | 1 |
| PPIE_HUMAN  | 31 | 33695  | 1 |
| HAX1_HUMAN  | 30 | 31601  | 1 |
| SUGT1_HUMAN | 30 | 41284  | 1 |
| NEK6_HUMAN  | 30 | 36261  | 1 |
| WDR82_HUMAN | 28 | 35456  | 1 |
| DTD1_HUMAN  | 28 | 23580  | 1 |
| ZFY16_HUMAN | 27 | 171192 | 1 |
| ZMAT2_HUMAN | 27 | 23768  | 1 |
| ECHD1_HUMAN | 27 | 33848  | 1 |
| PSB1_HUMAN  | 27 | 26700  | 1 |
| TIPRL_HUMAN | 27 | 31652  | 1 |
| PBDC1_HUMAN | 27 | 26155  | 1 |
| PROZ_HUMAN  | 26 | 46026  | 1 |
| NAA10_HUMAN | 25 | 26613  | 1 |
| S28A3_HUMAN | 24 | 77678  | 1 |
| SSU72_HUMAN | 24 | 23016  | 1 |
| CS052_HUMAN | 24 | 29500  | 1 |
| UCK2_HUMAN  | 24 | 29452  | 1 |
| ES1_HUMAN   | 24 | 28495  | 1 |
| CP1B1_HUMAN | 21 | 61263  | 1 |
| 41_HUMAN    | 23 | 97528  | 1 |
| MRGBP_HUMAN | 23 | 22574  | 1 |
| IFT46_HUMAN | 22 | 34436  | 1 |
| EGFL7_HUMAN | 22 | 30739  | 1 |
| SNAA_HUMAN  | 22 | 33667  | 1 |
| INT2_HUMAN  | 22 | 136118 | 1 |
| ARC_HUMAN   | 21 | 45573  | 1 |
| PCDG9_HUMAN | 21 | 102195 | 1 |
| AT2B1_HUMAN | 21 | 139637 | 1 |
| SFXN2_HUMAN | 21 | 36493  | 1 |
| FA60A_HUMAN | 21 | 25464  | 1 |
| NUMB_HUMAN  | 21 | 71444  | 1 |
| NMRL1_HUMAN | 21 | 33494  | 1 |
| GOSR1_HUMAN | 20 | 28709  | 1 |
| ITFG3_HUMAN | 20 | 60249  | 1 |
| CD022_HUMAN | 20 | 26853  | 1 |
| CASP9_HUMAN | 20 | 46993  | 1 |
| SNP29_HUMAN | 20 | 28953  | 1 |
| MMAB_HUMAN  | 20 | 27713  | 1 |
| AKP13_HUMAN | 19 | 310381 | 1 |
| EI2BA_HUMAN | 19 | 33976  | 1 |
| TPD54_HUMAN | 19 | 22281  | 1 |
| RGPD1_HUMAN | 18 | 198022 | 1 |
| SPD16_HUMAN | 18 | 37874  | 1 |

|              |     |        |   |
|--------------|-----|--------|---|
| H1BP3_HUMAN  | 18  | 42868  | 1 |
| HCDH_HUMAN   | 17  | 34329  | 1 |
| PSA2_HUMAN   | 17  | 25996  | 1 |
| FCSD1_HUMAN  | 16  | 77180  | 1 |
| KAD9_HUMAN   | 16  | 222698 | 1 |
| DYST_HUMAN   | 15  | 865259 | 1 |
| CB047_HUMAN  | 15  | 32923  | 1 |
| PRDX4_HUMAN  | 42  | 30749  | 1 |
| ARL1_HUMAN   | 102 | 20518  | 1 |
| ARF4_HUMAN   | 83  | 20612  | 1 |
| ATP5L_HUMAN  | 84  | 11421  | 1 |
| RAB1A_HUMAN  | 69  | 22891  | 1 |
| CGBP1_HUMAN  | 50  | 19094  | 1 |
| RS17L_HUMAN  | 43  | 15597  | 1 |
| LLPH_HUMAN   | 42  | 15329  | 1 |
| T126A_HUMAN  | 42  | 21742  | 1 |
| RAB7A_HUMAN  | 42  | 23760  | 1 |
| ARPC4_HUMAN  | 41  | 19768  | 1 |
| CCHL_HUMAN   | 41  | 30981  | 1 |
| GOGA7_HUMAN  | 40  | 16042  | 1 |
| LEG7_HUMAN   | 39  | 15123  | 1 |
| LTOR1_HUMAN  | 37  | 17848  | 1 |
| NDKB_HUMAN   | 36  | 17401  | 1 |
| RASN_HUMAN   | 35  | 21501  | 1 |
| RS30_HUMAN   | 35  | 6644   | 1 |
| NHP2_HUMAN   | 34  | 17532  | 1 |
| DUS23_HUMAN  | 32  | 16806  | 1 |
| RM22_HUMAN   | 32  | 23797  | 1 |
| TRAIIP_HUMAN | 31  | 53945  | 1 |
| RLP24_HUMAN  | 31  | 19893  | 1 |
| PHF5A_HUMAN  | 30  | 13138  | 1 |
| CQ10B_HUMAN  | 30  | 27509  | 1 |
| CE042_HUMAN  | 29  | 365280 | 1 |
| CTBP2_HUMAN  | 29  | 49427  | 1 |
| PLB1_HUMAN   | 28  | 164859 | 1 |
| CD248_HUMAN  | 28  | 82803  | 1 |
| COPZ1_HUMAN  | 27  | 20242  | 1 |
| COF1_HUMAN   | 27  | 18719  | 1 |
| RS27L_HUMAN  | 27  | 9813   | 1 |
| OR7C1_HUMAN  | 26  | 36122  | 1 |
| PSD10_HUMAN  | 25  | 24697  | 1 |
| SMIM4_HUMAN  | 24  | 8691   | 1 |
| PPIB_HUMAN   | 23  | 23785  | 1 |
| RL32_HUMAN   | 23  | 15964  | 1 |
| TXND2_HUMAN  | 23  | 60709  | 1 |
| CH10_HUMAN   | 22  | 10925  | 1 |
| FKB1A_HUMAN  | 22  | 12000  | 1 |
| FA65A_HUMAN  | 21  | 133423 | 1 |
| PTPM1_HUMAN  | 21  | 23000  | 1 |
| SNX12_HUMAN  | 19  | 19889  | 1 |
| NDKA_HUMAN   | 19  | 17309  | 1 |
| TXD17_HUMAN  | 19  | 14217  | 1 |
| MCEE_HUMAN   | 19  | 18851  | 1 |
| MYDGF_HUMAN  | 18  | 18897  | 1 |
| ZEP3_HUMAN   | 18  | 261129 | 1 |
| UB2V1_HUMAN  | 18  | 16598  | 1 |
| RAP2A_HUMAN  | 18  | 20830  | 1 |
| RGF1A_HUMAN  | 18  | 55148  | 1 |
| TMM97_HUMAN  | 18  | 21005  | 1 |
| SIG15_HUMAN  | 17  | 36086  | 1 |
| VWF_HUMAN    | 17  | 322401 | 1 |
| SYSM_HUMAN   | 16  | 58702  | 1 |
| P5CR2_HUMAN  | 16  | 33958  | 1 |
| ZN404_HUMAN  | 15  | 67264  | 1 |
| KIF12_HUMAN  | 15  | 71813  | 1 |

---

**Table S1. Identification procedures of HHT specific binding proteins detected by ESI-Q-TOF MS/MS.  
removed proteins because their scores were below or equal to 30 (17 proteins)**

| <b>prot_acc</b> | <b>prot_score</b> | <b>prot_mass</b> | <b>prot_sequences_sig</b> |
|-----------------|-------------------|------------------|---------------------------|
| CK5P2_HUMAN     | 30                | 216444           | 3                         |
| IQGA2_HUMAN     | 23                | 181036           | 2                         |
| ERAP1_HUMAN     | 30                | 107736           | 2                         |
| RBP2_HUMAN      | 26                | 362365           | 2                         |
| KS6A2_HUMAN     | 30                | 83642            | 2                         |
| CPT1A_HUMAN     | 27                | 88995            | 2                         |
| THMS2_HUMAN     | 30                | 72801            | 2                         |
| THOP1_HUMAN     | 28                | 79702            | 2                         |
| ERG7_HUMAN      | 27                | 84453            | 2                         |
| BANP_HUMAN      | 28                | 57143            | 2                         |
| EIF2A_HUMAN     | 25                | 65519            | 2                         |
| GALT2_HUMAN     | 19                | 65433            | 2                         |
| WDR5_HUMAN      | 29                | 37136            | 2                         |
| KPRA_HUMAN      | 26                | 39654            | 2                         |
| THOC6_HUMAN     | 20                | 38081            | 2                         |
| CF223_HUMAN     | 30                | 26211            | 2                         |
| TMX1_HUMAN      | 23                | 32170            | 2                         |

**Table S1. Identification procedures of HHT specific binding proteins detected by ESI-Q-TOF MS/MS.**

| removed proteins as they were smeard (11 proteins) |            |                 |                    |           |             |            |            |            |            |            |          |         |  |
|----------------------------------------------------|------------|-----------------|--------------------|-----------|-------------|------------|------------|------------|------------|------------|----------|---------|--|
| prot_acc                                           | prot_score | prot_mass (kDa) | prot_sequences_sig | >100(kDa) | 95-100(kDa) | 72-95(kDa) | 55-72(kDa) | 43-55(kDa) | 34-43(kDa) | 26-34(kDa) | <26(kDa) | Summary |  |
|                                                    |            |                 |                    | Slice1*   | Slice2*     | Slice3*    | Slice4*    | Slice5*    | Slice6*    | Slice7*    | Slice8*  |         |  |
| LONM_HUMAN                                         | 206        | 106.936         | 6                  | 1         | 1           | 1          | 1          | 1          | 1          | 1          | 0        | 6       |  |
| AAAT_HUMAN                                         | 114        | 57.018          | 2                  | 1         | 1           | 1          | 1          | 0          | 0          | 0          | 0        | 4       |  |
| RBBP7_HUMAN                                        | 88         | 48.132          | 2                  | 0         | 1           | 1          | 1          | 0          | 0          | 1          | 0        | 4       |  |
| HUWE1_HUMAN                                        | 80         | 485.523         | 3                  | 1         | 1           | 0          | 1          | 0          | 0          | 0          | 0        | 3       |  |
| EIFCL_HUMAN                                        | 50         | 106.091         | 2                  | 1         | 0           | 1          | 1          | 0          | 0          | 0          | 0        | 3       |  |
| ITPR1_HUMAN                                        | 73         | 317.151         | 3                  | 1         | 1           | 1          | 0          | 0          | 0          | 0          | 0        | 3       |  |
| MYO9B_HUMAN                                        | 49         | 244.846         | 2                  | 0         | 1           | 1          | 0          | 0          | 1          | 0          | 0        | 3       |  |
| ECM29_HUMAN                                        | 64         | 205.985         | 3                  | 1         | 1           | 1          | 0          | 0          | 0          | 0          | 0        | 3       |  |
| CHD1_HUMAN                                         | 31         | 197.707         | 2                  | 1         | 1           | 0          | 1          | 0          | 0          | 0          | 0        | 3       |  |
| RICTR_HUMAN                                        | 36         | 194.207         | 2                  | 1         | 1           | 0          | 1          | 0          | 0          | 0          | 0        | 3       |  |
| ARP3B_HUMAN                                        | 100        | 48.09           | 2                  | 0         | 0           | 1          | 1          | 0          | 1          | 0          | 0        | 3       |  |

\*:1, detected in this Slice; 0, not detected in this Slice

Table S1. Identification procedures of HHT specific binding proteins detected by ESI-Q-TOF MS/MS.

| removed proteins as they appeared in the wrong range region (46 proteins) |             |            |                 |                    |           |             |            |            |            |            |            |          |         |
|---------------------------------------------------------------------------|-------------|------------|-----------------|--------------------|-----------|-------------|------------|------------|------------|------------|------------|----------|---------|
|                                                                           | prot_acc    | prot_score | prot_mass (kDa) | prot_sequences_sig | >100(kDa) | 95-100(kDa) | 72-95(kDa) | 55-72(kDa) | 43-55(kDa) | 34-43(kDa) | 26-34(kDa) | <26(kDa) | Summary |
|                                                                           |             |            |                 |                    | Slice1*   | Slice2*     | Slice3*    | Slice4*    | Slice5*    | Slice6*    | Slice7*    | Slice8*  |         |
| Slice1                                                                    | IQGA3_HUMAN | 62         | 185.268         | 2                  | 0         | 1           | 0          | 0          | 0          | 0          | 0          | 0        | 1       |
| Slice1                                                                    | URB2_HUMAN  | 114        | 172.373         | 4                  | 0         | 1           | 0          | 0          | 0          | 0          | 0          | 0        | 1       |
| Slice1                                                                    | PDS5B_HUMAN | 34         | 165.818         | 2                  | 0         | 1           | 0          | 0          | 0          | 0          | 0          | 0        | 1       |
| Slice1                                                                    | AKNA_HUMAN  | 69         | 155.842         | 2                  | 0         | 1           | 1          | 0          | 0          | 0          | 0          | 0        | 2       |
| Slice1                                                                    | DIAP1_HUMAN | 151        | 141.942         | 7                  | 0         | 1           | 0          | 0          | 0          | 0          | 0          | 0        | 1       |
| Slice1                                                                    | DPOD1_HUMAN | 102        | 125.035         | 6                  | 0         | 1           | 1          | 0          | 0          | 0          | 0          | 0        | 2       |
| Slice1                                                                    | IPO5_HUMAN  | 56         | 125.032         | 5                  | 0         | 1           | 0          | 0          | 0          | 0          | 0          | 0        | 1       |
| Slice1                                                                    | CYTSA_HUMAN | 143        | 124.925         | 7                  | 0         | 1           | 0          | 0          | 0          | 0          | 0          | 0        | 1       |
| Slice1                                                                    | LARP1_HUMAN | 55         | 123.833         | 2                  | 0         | 1           | 0          | 0          | 0          | 0          | 0          | 0        | 1       |
| Slice1                                                                    | MYO1C_HUMAN | 274        | 122.461         | 9                  | 0         | 0           | 1          | 0          | 0          | 0          | 0          | 0        | 1       |
| Slice1                                                                    | GEM14_HUMAN | 35         | 121.728         | 2                  | 0         | 0           | 1          | 0          | 0          | 0          | 0          | 0        | 1       |
| Slice1                                                                    | IPO7_HUMAN  | 551        | 120.751         | 9                  | 0         | 0           | 1          | 0          | 0          | 0          | 0          | 0        | 1       |
| Slice1                                                                    | KIT_HUMAN   | 50         | 111.163         | 2                  | 0         | 0           | 1          | 0          | 0          | 0          | 0          | 0        | 1       |
| Slice2&3                                                                  | EXOC6_HUMAN | 98         | 94.404          | 4                  | 0         | 0           | 0          | 1          | 0          | 0          | 0          | 0        | 1       |
| Slice2&3                                                                  | VPS51_HUMAN | 65         | 86.901          | 3                  | 0         | 0           | 0          | 1          | 0          | 0          | 0          | 0        | 1       |
| Slice2&3                                                                  | EXOC5_HUMAN | 84         | 82.827          | 2                  | 0         | 0           | 0          | 1          | 0          | 0          | 0          | 0        | 1       |
| Slice2&3                                                                  | SUN2_HUMAN  | 145        | 80.49           | 3                  | 1         | 0           | 0          | 0          | 0          | 0          | 0          | 0        | 1       |
| Slice2&3                                                                  | AB11P_HUMAN | 68         | 73.593          | 2                  | 1         | 0           | 0          | 0          | 0          | 0          | 0          | 0        | 1       |
| Slice4                                                                    | SRP68_HUMAN | 215        | 71.199          | 6                  | 1         | 0           | 0          | 0          | 0          | 0          | 0          | 0        | 1       |
| Slice4                                                                    | TBRG4_HUMAN | 36         | 71.15           | 2                  | 0         | 0           | 1          | 0          | 0          | 0          | 0          | 0        | 1       |
| Slice4                                                                    | S27A2_HUMAN | 75         | 71.066          | 3                  | 1         | 0           | 0          | 0          | 0          | 0          | 0          | 0        | 1       |
| Slice4                                                                    | PAP1L_HUMAN | 136        | 68.976          | 2                  | 1         | 0           | 0          | 0          | 0          | 0          | 0          | 0        | 1       |
| Slice4                                                                    | GLMN_HUMAN  | 87         | 68.906          | 3                  | 0         | 0           | 1          | 0          | 0          | 0          | 0          | 0        | 1       |
| Slice4                                                                    | GDS1_HUMAN  | 125        | 67.073          | 5                  | 0         | 0           | 1          | 0          | 0          | 0          | 0          | 0        | 1       |
| Slice4                                                                    | CNOT6_HUMAN | 36         | 63.723          | 2                  | 0         | 0           | 1          | 0          | 0          | 0          | 0          | 0        | 1       |
| Slice4                                                                    | KCC2G_HUMAN | 479        | 63.311          | 7                  | 1         | 0           | 0          | 0          | 0          | 0          | 0          | 0        | 1       |
| Slice4                                                                    | RO60_HUMAN  | 66         | 61.372          | 4                  | 0         | 0           | 1          | 0          | 0          | 0          | 0          | 0        | 1       |
| Slice4                                                                    | EHD4_HUMAN  | 80         | 61.365          | 5                  | 0         | 0           | 1          | 0          | 0          | 0          | 1          | 0        | 2       |
| Slice4                                                                    | IMA7_HUMAN  | 317        | 60.733          | 6                  | 0         | 0           | 1          | 0          | 0          | 0          | 0          | 0        | 1       |
| Slice4                                                                    | K2C75_HUMAN | 216        | 59.809          | 3                  | 1         | 0           | 0          | 0          | 0          | 0          | 0          | 0        | 1       |
| Slice4                                                                    | API5_HUMAN  | 147        | 59.31           | 5                  | 0         | 0           | 1          | 0          | 0          | 0          | 0          | 0        | 1       |
| Slice4                                                                    | TCPB_HUMAN  | 66         | 57.794          | 2                  | 1         | 0           | 0          | 0          | 0          | 0          | 1          | 0        | 2       |
| Slice4                                                                    | CEP57_HUMAN | 97         | 57.396          | 2                  | 0         | 0           | 1          | 0          | 0          | 0          | 0          | 0        | 1       |
| Slice4                                                                    | DNJC7_HUMAN | 143        | 57.203          | 4                  | 0         | 0           | 1          | 0          | 0          | 0          | 0          | 0        | 1       |
| Slice4                                                                    | ERO1A_HUMAN | 65         | 55.213          | 2                  | 0         | 0           | 1          | 0          | 0          | 0          | 0          | 0        | 1       |
| Slice5                                                                    | OST48_HUMAN | 63         | 50.94           | 2                  | 0         | 0           | 1          | 0          | 0          | 0          | 0          | 0        | 1       |
| Slice5                                                                    | TBB4B_HUMAN | 255        | 50.255          | 6                  | 1         | 0           | 0          | 0          | 0          | 0          | 0          | 0        | 1       |
| Slice6                                                                    | IDH3B_HUMAN | 35         | 42.442          | 3                  | 0         | 0           | 0          | 1          | 0          | 0          | 0          | 0        | 1       |
| Slice6                                                                    | TWF2_HUMAN  | 43         | 39.751          | 2                  | 0         | 0           | 0          | 1          | 0          | 0          | 0          | 0        | 1       |
| Slice6                                                                    | GBB1_HUMAN  | 100        | 38.151          | 2                  | 1         | 0           | 0          | 0          | 0          | 0          | 0          | 0        | 1       |
| Slice6                                                                    | MDHC_HUMAN  | 85         | 36.631          | 4                  | 0         | 0           | 1          | 0          | 0          | 0          | 0          | 0        | 1       |
| Slice6                                                                    | PP2AA_HUMAN | 69         | 36.142          | 3                  | 0         | 0           | 0          | 1          | 0          | 0          | 0          | 0        | 1       |
| Slice6                                                                    | GRHPR_HUMAN | 32         | 36.045          | 2                  | 0         | 0           | 0          | 1          | 0          | 0          | 0          | 0        | 1       |
| Slice7                                                                    | RM19_HUMAN  | 38         | 33.799          | 2                  | 0         | 0           | 1          | 0          | 0          | 0          | 0          | 0        | 1       |
| Slice8                                                                    | ARF1_HUMAN  | 90         | 20.741          | 2                  | 0         | 0           | 0          | 0          | 0          | 1          | 0          | 0        | 1       |
| Slice8                                                                    | RS12_HUMAN  | 115        | 14.905          | 3                  | 0         | 0           | 0          | 0          | 0          | 1          | 0          | 0        | 1       |

\*:1, detected in this Slice; 0, not detected in this Slice

Table S1. Identification procedures of HHT specific binding proteins detected by ESI-Q-TOF MS/MS.

| 154 candidate proteins left |             |            |                 |                    |           |             |            |            |            |            |            |          |         |
|-----------------------------|-------------|------------|-----------------|--------------------|-----------|-------------|------------|------------|------------|------------|------------|----------|---------|
|                             | prot_acc    | prot_score | prot_mass (kDa) | prot_sequences_sig | >100(kDa) | 95-100(kDa) | 72-95(kDa) | 55-72(kDa) | 43-55(kDa) | 34-43(kDa) | 26-34(kDa) | <26(kDa) | Summary |
|                             |             |            |                 |                    | Slice1*   | Slice2*     | Slice3*    | Slice4*    | Slice5*    | Slice6*    | Slice7*    | Slice8*  |         |
| Slice1                      | PCNT_HUMAN  | 98         | 380.6           | 4                  | 1         | 0           | 0          | 0          | 0          | 0          | 0          | 0        | 1       |
| Slice1                      | NIPBL_HUMAN | 88         | 317.907         | 5                  | 1         | 0           | 0          | 0          | 0          | 0          | 0          | 0        | 1       |
| Slice1                      | FLNA_HUMAN  | 52         | 283.301         | 2                  | 1         | 0           | 0          | 0          | 0          | 0          | 0          | 0        | 1       |
| Slice1                      | CP250_HUMAN | 134        | 281.88          | 6                  | 1         | 0           | 1          | 0          | 0          | 0          | 0          | 0        | 2       |
| Slice1                      | ACACB_HUMAN | 1631       | 278.361         | 23                 | 1         | 0           | 0          | 1          | 0          | 0          | 0          | 0        | 2       |
| Slice1                      | SPTN2_HUMAN | 328        | 272.526         | 5                  | 1         | 0           | 1          | 0          | 0          | 0          | 0          | 0        | 2       |
| Slice1                      | TPR_HUMAN   | 44         | 267.53          | 2                  | 1         | 1           | 0          | 0          | 0          | 0          | 0          | 0        | 2       |
| Slice1                      | NU205_HUMAN | 138        | 230.171         | 5                  | 1         | 0           | 0          | 0          | 0          | 0          | 0          | 0        | 1       |
| Slice1                      | CHD3_HUMAN  | 62         | 227.989         | 2                  | 1         | 0           | 0          | 0          | 0          | 0          | 0          | 0        | 1       |
| Slice1                      | MICA3_HUMAN | 60         | 225.297         | 4                  | 1         | 0           | 0          | 0          | 0          | 0          | 0          | 0        | 1       |
| Slice1                      | DOCK2_HUMAN | 305        | 213.123         | 13                 | 1         | 0           | 0          | 0          | 0          | 0          | 0          | 0        | 1       |
| Slice1                      | EIF3A_HUMAN | 97         | 166.867         | 2                  | 1         | 0           | 0          | 0          | 0          | 0          | 0          | 0        | 1       |
| Slice1                      | SSH2_HUMAN  | 32         | 159.77          | 2                  | 1         | 0           | 0          | 0          | 0          | 0          | 0          | 0        | 1       |
| Slice1                      | CND1_HUMAN  | 108        | 158.508         | 4                  | 1         | 0           | 0          | 0          | 0          | 0          | 0          | 0        | 1       |
| Slice1                      | SSFA2_HUMAN | 149        | 139.554         | 3                  | 1         | 0           | 0          | 0          | 0          | 0          | 0          | 0        | 1       |
| Slice1                      | XPO5_HUMAN  | 158        | 138.332         | 3                  | 1         | 0           | 0          | 0          | 0          | 0          | 0          | 0        | 1       |
| Slice1                      | CAND1_HUMAN | 218        | 137.999         | 7                  | 1         | 0           | 0          | 0          | 0          | 0          | 0          | 0        | 1       |
| Slice1                      | TBCD_HUMAN  | 84         | 134.283         | 4                  | 1         | 0           | 1          | 0          | 0          | 0          | 0          | 0        | 2       |
| Slice1                      | AP3D1_HUMAN | 54         | 131.159         | 2                  | 1         | 0           | 0          | 1          | 0          | 0          | 0          | 0        | 1       |
| Slice1                      | PYC_HUMAN   | 1408       | 130.293         | 24                 | 1         | 0           | 0          | 0          | 0          | 0          | 0          | 0        | 1       |
| Slice1                      | IPO4_HUMAN  | 34         | 120.179         | 2                  | 1         | 0           | 0          | 0          | 0          | 0          | 0          | 0        | 1       |
| Slice1                      | RB12B_HUMAN | 40         | 118.372         | 2                  | 0         | 1           | 0          | 0          | 0          | 0          | 0          | 0        | 1       |
| Slice1                      | IPO9_HUMAN  | 59         | 116.858         | 2                  | 0         | 0           | 1          | 0          | 0          | 0          | 0          | 0        | 1       |
| Slice1                      | HLTF_HUMAN  | 40         | 114.883         | 3                  | 0         | 0           | 1          | 0          | 0          | 0          | 0          | 0        | 1       |
| Slice1                      | SYIM_HUMAN  | 45         | 114.688         | 2                  | 0         | 1           | 0          | 0          | 0          | 0          | 0          | 0        | 1       |
| Slice1                      | NNTM_HUMAN  | 64         | 114.564         | 2                  | 0         | 0           | 1          | 0          | 0          | 0          | 0          | 0        | 1       |
| Slice1                      | AT1A2_HUMAN | 64         | 113.505         | 2                  | 1         | 0           | 0          | 0          | 0          | 0          | 0          | 0        | 1       |
| Slice1                      | GTF2I_HUMAN | 45         | 112.859         | 2                  | 0         | 0           | 1          | 0          | 0          | 0          | 0          | 0        | 1       |
| Slice1                      | ARHG2_HUMAN | 81         | 112.386         | 5                  | 1         | 0           | 0          | 0          | 0          | 0          | 0          | 0        | 1       |
| Slice1                      | HYOU1_HUMAN | 187        | 111.494         | 7                  | 0         | 0           | 1          | 0          | 0          | 0          | 0          | 0        | 1       |
| Slice1                      | RAI14_HUMAN | 74         | 110.601         | 4                  | 0         | 0           | 1          | 0          | 0          | 0          | 0          | 0        | 1       |
| Slice1                      | XRN2_HUMAN  | 57         | 109.426         | 4                  | 0         | 0           | 1          | 0          | 0          | 0          | 0          | 0        | 1       |
| Slice1                      | SYAC_HUMAN  | 98         | 107.484         | 4                  | 0         | 0           | 1          | 0          | 0          | 0          | 0          | 0        | 1       |
| Slice1                      | XPC_HUMAN   | 55         | 106.743         | 4                  | 0         | 0           | 1          | 0          | 0          | 0          | 0          | 0        | 1       |
| Slice1                      | ACTN4_HUMAN | 451        | 105.245         | 9                  | 1         | 0           | 0          | 0          | 0          | 0          | 0          | 0        | 1       |
| Slice1                      | ACTN2_HUMAN | 151        | 104.358         | 4                  | 1         | 0           | 0          | 1          | 0          | 0          | 0          | 0        | 2       |
| Slice1                      | ACTN3_HUMAN | 61         | 103.917         | 3                  | 0         | 1           | 0          | 0          | 0          | 0          | 0          | 0        | 1       |
| Slice1                      | PSA_HUMAN   | 134        | 103.895         | 5                  | 0         | 0           | 1          | 0          | 0          | 0          | 0          | 0        | 1       |
| Slice1                      | HXK2_HUMAN  | 203        | 103.739         | 4                  | 0         | 0           | 1          | 0          | 0          | 0          | 0          | 0        | 1       |
| Slice1                      | SRRM1_HUMAN | 45         | 102.331         | 2                  | 0         | 0           | 1          | 1          | 0          | 0          | 0          | 0        | 2       |
| Slice2&3                    | VAV_HUMAN   | 48         | 99.677          | 2                  | 1         | 0           | 0          | 0          | 0          | 0          | 0          | 0        | 1       |
| Slice2&3                    | COPG2_HUMAN | 58         | 98.7            | 2                  | 1         | 0           | 0          | 0          | 0          | 0          | 0          | 0        | 1       |
| Slice2&3                    | DYN2_HUMAN  | 49         | 98.345          | 3                  | 1         | 0           | 0          | 0          | 0          | 0          | 0          | 0        | 1       |
| Slice2&3                    | VPS16_HUMAN | 39         | 95.66           | 2                  | 0         | 0           | 1          | 0          | 0          | 0          | 0          | 0        | 1       |
| Slice2&3                    | NSMA3_HUMAN | 40         | 94.033          | 3                  | 0         | 0           | 1          | 0          | 0          | 0          | 0          | 0        | 1       |
| Slice2&3                    | TELO2_HUMAN | 57         | 92.43           | 2                  | 0         | 1           | 0          | 1          | 0          | 0          | 0          | 0        | 2       |
| Slice2&3                    | STA5B_HUMAN | 132        | 90.323          | 6                  | 1         | 0           | 0          | 0          | 0          | 0          | 0          | 0        | 1       |
| Slice2&3                    | TBCD5_HUMAN | 63         | 89.519          | 3                  | 0         | 0           | 1          | 0          | 0          | 0          | 0          | 0        | 1       |
| Slice2&3                    | STAT1_HUMAN | 72         | 87.85           | 4                  | 0         | 0           | 1          | 0          | 0          | 1          | 0          | 0        | 2       |
| Slice2&3                    | SC23A_HUMAN | 80         | 87.018          | 3                  | 0         | 1           | 0          | 0          | 0          | 0          | 0          | 0        | 1       |
| Slice2&3                    | A16A1_HUMAN | 89         | 86.1            | 3                  | 0         | 0           | 1          | 1          | 0          | 0          | 0          | 0        | 2       |
| Slice2&3                    | APC5_HUMAN  | 71         | 85.707          | 4                  | 0         | 0           | 1          | 0          | 0          | 0          | 0          | 0        | 1       |
| Slice2&3                    | ELMO1_HUMAN | 118        | 84.517          | 5                  | 0         | 0           | 1          | 0          | 0          | 0          | 0          | 0        | 1       |
| Slice2&3                    | KS6A3_HUMAN | 63         | 84.025          | 4                  | 0         | 0           | 1          | 0          | 0          | 0          | 0          | 0        | 1       |
| Slice2&3                    | SYG_HUMAN   | 209        | 83.854          | 5                  | 0         | 0           | 1          | 0          | 0          | 0          | 0          | 0        | 1       |
| Slice2&3                    | EXOC7_HUMAN | 82         | 83.729          | 3                  | 0         | 0           | 1          | 0          | 0          | 0          | 0          | 0        | 1       |
| Slice2&3                    | ABCD1_HUMAN | 45         | 83.398          | 2                  | 0         | 0           | 1          | 0          | 0          | 0          | 0          | 0        | 1       |
| Slice2&3                    | CSTF3_HUMAN | 39         | 83.325          | 2                  | 0         | 0           | 1          | 0          | 0          | 0          | 0          | 0        | 1       |
| Slice2&3                    | ORC3_HUMAN  | 70         | 83.285          | 2                  | 0         | 0           | 1          | 1          | 0          | 0          | 0          | 0        | 2       |
| Slice2&3                    | ELMO2_HUMAN | 172        | 83.018          | 7                  | 0         | 1           | 0          | 1          | 0          | 0          | 0          | 0        | 2       |
| Slice2&3                    | CAN1_HUMAN  | 128        | 82.465          | 7                  | 0         | 0           | 1          | 0          | 0          | 0          | 0          | 0        | 1       |
| Slice2&3                    | PLAK_HUMAN  | 105        | 82.434          | 6                  | 0         | 0           | 1          | 0          | 0          | 0          | 0          | 0        | 1       |
| Slice2&3                    | CEP83_HUMAN | 48         | 82.18           | 4                  | 0         | 0           | 1          | 0          | 0          | 0          | 0          | 0        | 1       |
| Slice2&3                    | ACPH_HUMAN  | 55         | 82.142          | 3                  | 0         | 0           | 1          | 0          | 0          | 0          | 0          | 0        | 1       |
| Slice2&3                    | PPCE_HUMAN  | 91         | 81.56           | 5                  | 0         | 0           | 1          | 1          | 0          | 0          | 0          | 0        | 2       |
| Slice2&3                    | ABCF3_HUMAN | 172        | 80.094          | 5                  | 1         | 0           | 1          | 0          | 0          | 0          | 0          | 0        | 2       |
| Slice2&3                    | PTCD3_HUMAN | 107        | 79.184          | 3                  | 0         | 1           | 0          | 0          | 0          | 0          | 0          | 0        | 1       |
| Slice2&3                    | NKRF_HUMAN  | 54         | 78.308          | 2                  | 0         | 1           | 1          | 0          | 0          | 0          | 0          | 0        | 2       |
| Slice2&3                    | KPCB_HUMAN  | 100        | 77.96           | 2                  | 0         | 1           | 0          | 0          | 0          | 0          | 0          | 0        | 1       |
| Slice2&3                    | KPCA_HUMAN  | 136        | 77.841          | 3                  | 0         | 0           | 1          | 0          | 0          | 0          | 0          | 0        | 1       |
| Slice2&3                    | SHKB1_HUMAN | 64         | 76.923          | 3                  | 0         | 0           | 1          | 1          | 0          | 0          | 0          | 0        | 2       |
| Slice2&3                    | SHCBP_HUMAN | 69         | 76.726          | 4                  | 0         | 0           | 1          | 1          | 0          | 0          | 0          | 0        | 1       |
| Slice2&3                    | AKAP8_HUMAN | 56         | 76.631          | 3                  | 0         | 0           | 1          | 1          | 0          | 0          | 0          | 0        | 2       |
| Slice2&3                    | ABCD3_HUMAN | 114        | 75.941          | 6                  | 1         | 0           | 1          | 0          | 0          | 0          | 0          | 0        | 2       |
| Slice2&3                    | SCFD2_HUMAN | 77         | 75.877          | 4                  | 0         | 0           | 1          | 1          | 0          | 0          | 0          | 0        | 2       |
| Slice2&3                    | CMC1_HUMAN  | 324        | 75.114          | 9                  | 0         | 0           | 1          | 0          | 0          | 0          | 0          | 0        | 1       |
| Slice2&3                    | DGLB_HUMAN  | 33         | 74.882          | 2                  | 0         | 0           | 1          | 1          | 0          | 0          | 0          | 0        | 2       |
| Slice2&3                    | CMC2_HUMAN  | 219        | 74.528          | 8                  | 0         | 0           | 1          | 0          | 0          | 1          | 0          | 0        | 2       |
| Slice2&3                    | DEF16_HUMAN | 94         | 74.435          | 2                  | 0         | 0           | 1          | 0          | 0          | 0          | 0          | 0        | 1       |
| Slice2&3                    | TEC_HUMAN   | 102        | 74.389          | 3                  | 0         | 0           | 0          | 1          | 0          | 0          | 0          | 0        | 1       |
| Slice2&3                    | FAF1_HUMAN  | 40         | 74.364          | 3                  | 0         | 0           | 0          | 1          | 0          | 0          | 0          | 0        | 1       |
| Slice2&3                    | RAF1_HUMAN  | 89         | 73.803          | 2                  | 0         | 0           | 1          | 0          | 0          | 0          | 0          | 0        | 1       |
| Slice2&3                    | SDHA_HUMAN  | 125        | 73.672          | 2                  | 1         | 1           | 0          | 0          | 0          | 0          | 0          | 0        | 2       |
| Slice2&3                    | AMPB_HUMAN  | 178        | 73.234          | 7                  | 0         | 0           | 1          | 1          | 0          | 0          | 0          | 0        | 2       |
| Slice2&3                    | SAMH1_HUMAN | 79         | 72.896          | 5                  | 0         | 0           | 0          | 1          | 0          | 0          | 0          | 0        | 1       |
| Slice2&3                    | SCFD1_HUMAN | 56         | 72.676          | 2                  | 0         | 0           | 1          | 0          | 0          | 0          | 0          | 0        | 1       |
| Slice2&4                    | TR125_HUMAN | 170        | 72.581          | 6                  | 1         | 0           | 1          | 0          | 0          | 0          | 0          | 0        | 2       |
| Slice4                      | TRXR1_HUMAN | 31         | 71.832          | 2                  | 0         | 0           | 0          | 1          | 0          | 0          | 0          | 0        | 1       |
| Slice4                      | CLPX_HUMAN  | 158        | 69.922          | 6                  | 0         | 0           | 1          | 1          | 0          | 0          | 0          | 0        | 2       |
| Slice4                      | CDC23_HUMAN | 76         | 69.588          | 4                  | 0         | 0           | 0          | 1          | 0          | 0          | 0          | 0        | 1       |
| Slice4                      | ACAD9_HUMAN | 152        | 69.344          | 3                  | 0         | 0           | 0          | 1          | 0          | 0          | 0          | 0        | 1       |
| Slice4                      | ILVBL_HUMAN | 138        | 68.452          | 7                  | 0         | 0           | 0          | 1          | 0          | 0          | 0          | 0        | 1       |
| Slice4                      | INT11_HUMAN | 43         | 68.36           | 2                  | 0         | 0           | 1          | 1          | 0          | 0          | 0          | 0        | 2       |
| Slice4                      | PTN6_HUMAN  | 38         | 67.918          | 2                  | 0         | 0           | 0          | 1          | 0          | 0          | 0          | 0        | 1       |
| Slice4                      | SAC1_HUMAN  | 111        | 67.437          | 5                  | 0         | 0           | 0          | 1          | 0          | 0          | 0          | 0        | 1       |
| Slice4                      | PAPD1_HUMAN | 65         | 66.985          | 3                  | 0         | 0           | 0          | 1          | 0          | 0          | 0          | 0        | 1       |
| Slice4                      | PARP2_HUMAN | 136        | 66.734          | 4                  | 0         | 0           | 0          | 1          | 0          | 1          | 0          | 0        | 2       |
| Slice4                      | 2AAA_HUMAN  | 274        | 66.065          | 9                  | 0         | 0           | 0          | 1          | 0          | 0          | 0          | 0        | 1       |
| Slice4                      | ASNS_HUMAN  | 72         | 64.899          | 3                  | 0         | 0           | 0          | 1          | 0          | 0          | 0          | 0        | 1       |
| Slice4                      | AAPK1_HUMAN | 59         | 64.596          | 5                  | 0         | 0           | 0          | 1          | 0          | 0          | 0          | 0        | 1       |
| Slice4                      | DJC11_HUMAN | 172        | 63.524          | 6                  | 0         | 0           | 0          | 1          | 0          | 0          | 0          | 0        | 1       |
| Slice4                      | TBL1X_HUMAN | 71         | 63.255          | 2                  | 0         | 0           | 0          | 1          | 0          | 0          | 0          | 0        | 1       |
| Slice4                      | TRI26_HUMAN | 50         | 62.925          | 2                  | 0         | 0           | 0          | 1          | 0          | 0          | 0          | 0        | 1       |
| Slice4                      | ELP3_HUMAN  | 131        | 62.789          | 5                  | 0         | 0           | 0          | 1          | 0          | 0          | 0          | 0        | 1       |
| Slice4                      | DPYL2_HUMAN | 108        | 62.711          | 5                  | 0         | 0           | 0          | 1          | 0          | 0          | 0          | 0        | 1       |
| Slice4                      | COASY_HUMAN | 136        | 62.632          | 4                  | 0         | 0           | 0          | 1          | 0          | 0          | 0          | 0        | 1       |
| Slice4                      | MUS81_HUMAN | 49         | 61.705          | 2                  | 0         | 0           | 0          | 1          | 0          | 0          | 0          | 0        | 1       |
| Slice4                      | PGM1_HUMAN  | 102        | 61.696          | 3                  | 0         | 0           | 0          | 1          | 0          | 0          | 0          | 0        | 1       |
| Slice4                      | MPP6_HUMAN  | 54         | 61.364          | 3                  | 0         | 0           | 0          | 1          | 0          | 0          | 0          | 0        | 1       |
| Slice4                      | FYN_HUMAN   | 53         | 61.237          | 2                  | 0         | 0           | 0          | 1          | 0          | 0          | 0          | 0        | 1       |

|        |              |     |        |    |   |   |   |   |   |   |   |   |   |
|--------|--------------|-----|--------|----|---|---|---|---|---|---|---|---|---|
| Slice4 | TCHP_HUMAN   | 76  | 61.148 | 4  | 0 | 0 | 0 | 1 | 0 | 0 | 0 | 0 | 1 |
| Slice4 | GLYR1_HUMAN  | 43  | 61.088 | 2  | 0 | 0 | 1 | 1 | 0 | 0 | 0 | 0 | 2 |
| Slice4 | IMA6_HUMAN   | 235 | 61.052 | 4  | 0 | 0 | 0 | 1 | 0 | 0 | 0 | 0 | 1 |
| Slice4 | SRC_HUMAN    | 57  | 60.31  | 3  | 0 | 0 | 1 | 0 | 0 | 0 | 0 | 0 | 1 |
| Slice4 | ATLA3_HUMAN  | 124 | 60.96  | 4  | 0 | 0 | 0 | 1 | 0 | 0 | 0 | 0 | 1 |
| Slice4 | ULA1_HUMAN   | 42  | 60.665 | 2  | 0 | 0 | 0 | 1 | 0 | 0 | 0 | 0 | 1 |
| Slice4 | COR2A_HUMAN  | 81  | 60.239 | 3  | 0 | 0 | 0 | 1 | 0 | 0 | 0 | 0 | 1 |
| Slice4 | RIC8A_HUMAN  | 337 | 60.185 | 10 | 0 | 0 | 0 | 1 | 0 | 0 | 0 | 0 | 1 |
| Slice4 | CPNE1_HUMAN  | 89  | 59.649 | 3  | 0 | 0 | 0 | 1 | 0 | 0 | 0 | 0 | 1 |
| Slice4 | PRP4_HUMAN   | 62  | 59.097 | 4  | 0 | 0 | 0 | 1 | 0 | 0 | 0 | 0 | 1 |
| Slice4 | PSPC1_HUMAN  | 32  | 58.82  | 2  | 0 | 0 | 0 | 1 | 0 | 0 | 1 | 0 | 2 |
| Slice4 | IMA3_HUMAN   | 101 | 58.364 | 3  | 0 | 0 | 0 | 1 | 0 | 0 | 0 | 0 | 1 |
| Slice4 | IMA4_HUMAN   | 237 | 58.288 | 7  | 0 | 0 | 0 | 1 | 0 | 0 | 0 | 0 | 1 |
| Slice4 | OXS1_HUMAN   | 401 | 58.271 | 6  | 0 | 0 | 0 | 1 | 0 | 0 | 0 | 0 | 1 |
| Slice4 | REN3B_HUMAN  | 57  | 57.841 | 3  | 0 | 0 | 0 | 1 | 0 | 0 | 0 | 0 | 1 |
| Slice4 | COPD_HUMAN   | 367 | 57.63  | 8  | 1 | 1 | 0 | 0 | 0 | 0 | 0 | 0 | 2 |
| Slice4 | SYFA_HUMAN   | 407 | 57.585 | 6  | 1 | 1 | 0 | 0 | 0 | 0 | 0 | 0 | 2 |
| Slice4 | PNKP_HUMAN   | 71  | 57.554 | 2  | 0 | 0 | 0 | 1 | 0 | 0 | 0 | 0 | 1 |
| Slice4 | PPP5_HUMAN   | 61  | 57.412 | 3  | 0 | 0 | 0 | 1 | 0 | 0 | 0 | 0 | 1 |
| Slice4 | DC1L1_HUMAN  | 190 | 56.829 | 7  | 0 | 0 | 0 | 1 | 0 | 0 | 0 | 0 | 1 |
| Slice4 | EDC3_HUMAN   | 38  | 56.784 | 3  | 0 | 0 | 0 | 1 | 0 | 0 | 0 | 0 | 1 |
| Slice4 | CCD47_HUMAN  | 32  | 56.123 | 2  | 0 | 0 | 0 | 1 | 0 | 0 | 0 | 0 | 1 |
| Slice4 | FA98A_HUMAN  | 107 | 55.823 | 3  | 0 | 0 | 0 | 1 | 0 | 0 | 0 | 0 | 1 |
| Slice4 | STK4_HUMAN   | 66  | 55.823 | 3  | 0 | 0 | 0 | 1 | 0 | 0 | 0 | 0 | 1 |
| Slice4 | HSP7E_HUMAN  | 73  | 55.444 | 2  | 0 | 0 | 0 | 1 | 0 | 0 | 0 | 0 | 1 |
| Slice4 | WDR37_HUMAN  | 41  | 55.316 | 2  | 0 | 0 | 0 | 1 | 0 | 0 | 0 | 0 | 1 |
| Slice5 | QCR2_HUMAN   | 93  | 48.584 | 2  | 0 | 0 | 0 | 1 | 0 | 0 | 0 | 0 | 1 |
| Slice5 | SAHH_HUMAN   | 143 | 48.255 | 2  | 0 | 0 | 0 | 1 | 0 | 0 | 1 | 0 | 2 |
| Slice6 | EIF3M_HUMAN  | 48  | 42.932 | 2  | 0 | 0 | 0 | 0 | 1 | 0 | 0 | 0 | 1 |
| Slice6 | RT22_HUMAN   | 49  | 41.425 | 4  | 0 | 0 | 0 | 0 | 1 | 0 | 0 | 0 | 1 |
| Slice6 | TIM50_HUMAN  | 47  | 39.85  | 2  | 0 | 0 | 0 | 0 | 1 | 0 | 0 | 0 | 1 |
| Slice6 | AXA2L_HUMAN  | 60  | 38.806 | 3  | 0 | 0 | 1 | 0 | 0 | 0 | 0 | 0 | 1 |
| Slice6 | GLRX3_HUMAN  | 51  | 37.693 | 2  | 0 | 0 | 0 | 0 | 0 | 1 | 0 | 0 | 1 |
| Slice6 | PRKRA_HUMAN  | 35  | 34.839 | 2  | 0 | 0 | 0 | 0 | 0 | 1 | 0 | 0 | 1 |
| Slice6 | AIMP1_HUMAN  | 151 | 34.616 | 3  | 0 | 0 | 0 | 0 | 0 | 1 | 0 | 0 | 1 |
| Slice6 | GHC2_HUMAN   | 95  | 34.34  | 2  | 0 | 0 | 0 | 0 | 0 | 1 | 0 | 0 | 1 |
| Slice7 | WDR61_HUMAN  | 122 | 33.731 | 2  | 0 | 0 | 0 | 0 | 0 | 1 | 0 | 0 | 1 |
| Slice7 | GNP11_HUMAN  | 46  | 32.819 | 3  | 0 | 0 | 0 | 0 | 0 | 1 | 0 | 0 | 1 |
| Slice7 | DEC2_HUMAN   | 42  | 31.1   | 2  | 0 | 0 | 0 | 0 | 0 | 1 | 0 | 0 | 1 |
| Slice7 | CLIC4_HUMAN  | 76  | 28.982 | 3  | 0 | 0 | 0 | 0 | 0 | 1 | 1 | 0 | 2 |
| Slice7 | PGAM4_HUMAN  | 47  | 28.93  | 2  | 0 | 0 | 0 | 0 | 0 | 1 | 0 | 0 | 1 |
| Slice7 | HCD2_HUMAN   | 214 | 27.134 | 6  | 0 | 0 | 0 | 0 | 0 | 0 | 1 | 0 | 1 |
| Slice7 | CPSF5_HUMAN  | 133 | 26.268 | 4  | 0 | 0 | 0 | 0 | 0 | 1 | 0 | 0 | 1 |
| Slice8 | ARPF5L_HUMAN | 123 | 16.931 | 2  | 0 | 0 | 0 | 0 | 0 | 0 | 1 | 0 | 1 |

\*:1, detected in this Slice; 0, not detected in this Slice



**Table S2. Primers used in this study**

| Primers                                       | Primer sequence (5'→3')                                           |
|-----------------------------------------------|-------------------------------------------------------------------|
| <b>Human <i>NKRF</i> gene transcription</b>   |                                                                   |
| <i>NKRF</i> F                                 | GTCAAAAACGCCACCTCTCAA                                             |
| <i>NKRF</i> R                                 | CTCGCATGGAATTTGGAACCG                                             |
| <b>Human <i>MYC</i> gene transcription</b>    |                                                                   |
| <i>MYC</i> F                                  | AGCCACAGCATACATCCT                                                |
| <i>MYC</i> R                                  | CGCACAAAGAGTTCCGTAG                                               |
| <b>Human <i>CTNNB1</i> gene transcription</b> |                                                                   |
| <i>CTNNB1</i> F                               | AGCCGACACCAAGAAGCAGAGA                                            |
| <i>CTNNB1</i> R                               | TGCGGGACAAAGGGCAAGATTT                                            |
| <b>Human <i>MCL1</i> gene transcription</b>   |                                                                   |
| <i>MCL1</i> F                                 | GTGCCTTTGTGGCTAAACACT                                             |
| <i>MCL1</i> R                                 | AGTCCCCTTTTGTCCCTTACGA                                            |
| <b>Human <i>MYC</i> promoter</b>              |                                                                   |
| <i>MYC</i> F                                  | GAAGTTGGCATTGGCTTT                                                |
| <i>MYC</i> R                                  | CAGGAGAATCGGACACATC                                               |
| <b>Human <i>KIT</i> gene transcription</b>    |                                                                   |
| <i>KIT</i> F                                  | CGTTCTGCTCCTACTGCTTCG                                             |
| <i>KIT</i> R                                  | CCCACGCGGACTATTAAGTCT                                             |
| <b>Human <i>GAPDH</i> gene transcription</b>  |                                                                   |
| <i>GAPDH</i> F                                | GAAGGTGAAGGTCGGAGTC                                               |
| <i>GAPDH</i> R                                | GAAGATGGTGATGGGATTTTC                                             |
| <b><i>NKRF</i> deletion mutants</b>           |                                                                   |
| <i>NKRF</i> ΔDSRM1 F                          | GTCATTACAGAAAATGCAAATGATAAAACACAGCCCACTTATCCATC                   |
| <i>NKRF</i> ΔDSRM1 R                          | GATGGATAAGTGGGCTGTGTTTTATCATTTCATTTCTGTAATGAC                     |
| <i>NKRF</i> ΔDSRM2 F                          | CAGTTGGCTGGGTCTTATTTGAAGAATTCTCATAAACTACAAGATC                    |
| <i>NKRF</i> ΔDSRM2 R                          | GATCTTGTAGTTTATGAGAATTCTTCAATAAGACCCAGCCAACTG                     |
| <b><i>NKRF</i> point mutants</b>              |                                                                   |
| <i>NKRF</i> -L476A F                          | GATGACAGGCGCCCGCTGGAAATGCAAAGTGATTCTAGA                           |
| <i>NKRF</i> -L476A R                          | TTTCCAGCGGGCGCCTGTCATCCTTTCATAGACATACTCAACTG                      |
| <i>NKRF</i> -R477A F                          | GACAGGCCTCGCCTGGAATGCAAAGTGATTCTAGAGAGTGAAG                       |
| <i>NKRF</i> -R477A R                          | GCATTTCCAGGCGAGGCCTGTCATCCTTTCATAGACATACTC                        |
| <i>NKRF</i> -W478A F                          | AGGCCTCCGCGCGAAATGCAAAGTGATTCTAGAGAGTGAAGTAATTG                   |
| <i>NKRF</i> -W478A R                          | TTTGCATTTGCGCGGGAGGCCTGTCATCCTTTCATA                              |
| <i>NKRF</i> -K479A F                          | CCTCCGCTGGGCATGCAAAGTGATTCTAGAGAGTGAAGTAATTGCA                    |
| <i>NKRF</i> -K479A R                          | CACTTTGCATGCCACGCGGAGGCCTGTCATCCTTT                               |
| <i>NKRF</i> -C480A F                          | CCGCTGGAAAGCCAAAGTGATTCTAGAGAGTGAAGTAATTGCAGAAG                   |
| <i>NKRF</i> -C480A R                          | AATCACTTTGGCTTTCCAGCGGAGGCCTGTCATC                                |
| <i>NKRF</i> -K479AC480A F                     | CCTCCGCTGGGCAGCCAAAGTGATTCTAGAGAGTGAAGTAATTGCAGAAG                |
| <i>NKRF</i> -K479AC480A R                     | AATCACTTTGGCTGCCAGCGGAGGCCTGTCATCCTTT                             |
| <b><i>NKRF</i> shRNA</b>                      |                                                                   |
| <i>NKRF</i> shRNA F                           | GATCCGGATGTAGAGAGGGTGAATAATTCAAGAGATTATTCACCCCTCTACATCCTTTTTTG    |
| <i>NKRF</i> shRNA R                           | AATTCAAAAAAGGATGTAGAGAGGGTGAATAATCTCTTGAATTATTCACCCCTCTACAT CCG   |
| shSCR F                                       | GATCCAGCGTGTAGCTAGCAGAGGTTCAAGAGACCTCTGCTAGCTACACGCTTTTTTTACGCGTG |
| shSCR R                                       | AATTCACGCGTAAAAAAGCGTGTAGCTAGCAGAGGTTCTTGAACCTCTGCTAGCTACACGCTG   |
